# Supplementary material for: A method for accessing sulfanylfurans from homopropargylic alcohols and sulfonyl hydrazides
Source: Royal Society of Chemistry journal article supplement (doi:10.1039/c7ob00566k), 2017-01-01

## Supporting Information

### Method for Accessing Sulfanylfurans from Homopropargylic

### Alcohols and Sulfonyl Hydrazides

Xiaodong Yang, Rulong Yan\*

State Key Laboratory of Applied Organic Chemistry, Key laboratory of Nonferrous Metal Chemistry and Resources Utilization of Gansu Province, Department of Chemistry, Lanzhou University, Lanzhou, Gansu, China

|                                   |         |
|-----------------------------------|---------|
| General remark                    | S2      |
| The x-ray structure of <b>3ag</b> | S2-S3   |
| Experimental Section              | S3-S5   |
| The data of products              | S5-S26  |
| Reference                         | S26     |
| NMR spectra                       | S27-S92 |

## General remark

$^1\text{H}$  NMR and  $^{13}\text{C}$  NMR spectra were recorded on 400MHz and 100MHz in  $\text{CDCl}_3$  (BRUKER 400M or JNM-ECS 400M). All chemical shifts are given as  $\delta$  value (ppm) with reference to tetramethylsilane (TMS) as an internal standard. All compounds were further characterized by HRMS; copies of their  $^1\text{H}$  NMR and  $^{13}\text{C}$  NMR spectra are provided. Products were purified by flash chromatography on 200–300 mesh silica gels. All melting points were determined without correction. Unless otherwise noted, commercially available reagents and solvents were used without further purification.

## The x-ray structure of **3ag**

### Crystal **3ag** Growth with the Volatilization Method

An amount of 20 mg **3ag** were dissolved in tetrahydrofuran (2 mL) on the brown small reagent bottle (5 mL), which acted as good solvent, and a layer of ether was injected on the surface of tetrahydrofuran, and the cap is covered with a thin film, white crystals will be presented after three days.

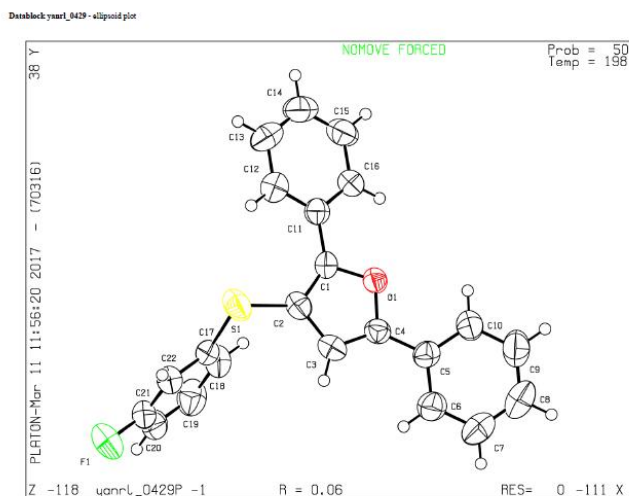

**Datablock: yanrl\_0429**

|                                                               |                   |                                  |                 |
|---------------------------------------------------------------|-------------------|----------------------------------|-----------------|
| Bond precision: C-C = 0.0050 Å                                |                   | Wavelength=0.71073               |                 |
| Cell:                                                         | a=5.7144 (13)     | b=12.030 (3)                     | c=12.5875 (12)  |
|                                                               | alpha=92.050 (14) | beta=92.677 (13)                 | gamma=90.37 (2) |
| Temperature:                                                  | 198 K             |                                  |                 |
|                                                               | Calculated        | Reported                         |                 |
| Volume                                                        | 863.8 (3)         | 863.8 (3)                        |                 |
| Space group                                                   | P -1              | P -1                             |                 |
| Hall group                                                    | -P 1              | -P 1                             |                 |
| Moiety formula                                                | C22 H15 F O S     | C22 H15 F O S                    |                 |
| Sum formula                                                   | C22 H15 F O S     | C22 H15 F O S                    |                 |
| Mr                                                            | 346.40            | 346.40                           |                 |
| Dx, g cm-3                                                    | 1.332             | 1.332                            |                 |
| Z                                                             | 2                 | 2                                |                 |
| Mu (mm-1)                                                     | 0.203             | 0.203                            |                 |
| F000                                                          | 360.0             | 360.0                            |                 |
| F000'                                                         | 360.41            |                                  |                 |
| h,k,lmax                                                      | 7,14,15           | 7,14,15                          |                 |
| Nref                                                          | 3398              | 3389                             |                 |
| Tmin,Tmax                                                     | 0.966,0.976       | 0.650,1.000                      |                 |
| Tmin'                                                         | 0.958             |                                  |                 |
| Correction method= # Reported T Limits: Tmin=0.650 Tmax=1.000 |                   |                                  |                 |
| AbsCorr = MULTI-SCAN                                          |                   |                                  |                 |
| Data completeness= 0.997                                      |                   | Theta(max)= 26.022               |                 |
| R(reflections)= 0.0619 ( 1775)                                |                   | wR2(reflections)= 0.1656 ( 3389) |                 |
| S = 1.061                                                     |                   | Npar= 226                        |                 |

**General procedure for the synthesis of homopropargylic alcohols<sup>[1-2]</sup>:**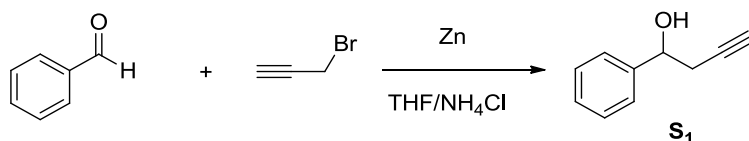

- 1) Aldehyde (1.0 equiv.) was dissolved in anhydrous THF. A sample was taken out for analysis and propargyl bromide (2.0 equiv.) was added. Another sample was taken out for analysis and saturated aqueous NH<sub>4</sub>Cl was added. Portions of activated zinc dust (2.0 equiv.) were added slowly on at 0°C and the resulting suspension was stirred overnight at this temperature. The THF layer was separated from the aqueous layer, which was extracted with diethyl ether for 3 times. The combined organic layers were washed with brine, dried over Na<sub>2</sub>SO<sub>4</sub>, filtered and concentrated in vacuo. The crude product was directly used in the next step

without further purification; the residue was purified by column chromatography (silica gel, appropriate mixture of *n*-hexane/ethyl acetate) to obtain **S<sub>1</sub>**.

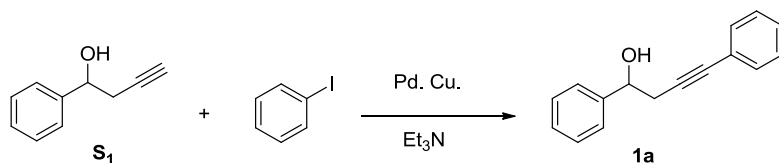

- 2) To a dried schlenk flask was added Pd(PPh<sub>3</sub>)<sub>2</sub>Cl<sub>2</sub> (0.2 mmol), CuI (0.2 mmol), iodoarene (11.0 mmol), **S<sub>1</sub>** (10.0 mmol) and freshly distilled Et<sub>3</sub>N under argon. The resulting mixture was stirred for 16 h at rt. 50 mL of EtOAc were added and the mixture filtered. After removal of solvent using rotary evaporator, the crude compound was purified by SiO<sub>2</sub> chromatography to give **1a-1u**.

**1v** were prepared in the method<sup>[3]</sup>

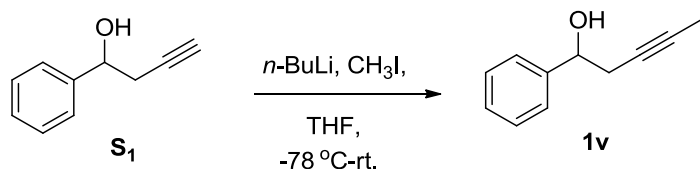

*n*-BuLi (2.5 M in hexanes, 6 mL, 15 mmol) was slowly added to a stirred solution of the propargyl alcohol (876 mg, 6 mmol) prepared in dry THF (20 mL) at -78 °C under Ar. After being stirred at -78 °C for 1 h, the reaction mixture was treated with CH<sub>3</sub>I (1.12 mL, 18 mmol) and then allowed to warm to rt over night. The reaction mixture was then cooled to -78 °C again, quenched with sat NH<sub>4</sub>Cl (aq) (10 mL) and extracted with Et<sub>2</sub>O (3 \* 20 mL). The combined organic phases were dried over Na<sub>2</sub>SO<sub>4</sub>, filtered and concentrated in vacuo. The residue was purified by column chromatography on silica gel to give **1t** as yellow oil.

**1w** were prepared in the method<sup>[4]</sup>

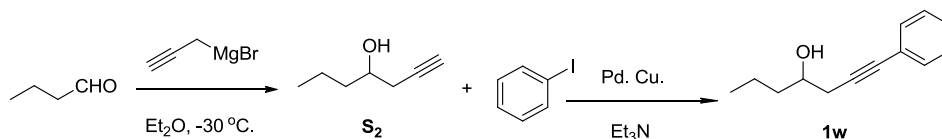

Under an argon atmosphere, magnesium turnings (0.67 g, 27.5 mmol) and mercury chloride (0.34 g, 1.3 mmol) were mixed in dry diethyl ether (40 mL) in a 250 mL round-bottom flask. To the solution, propargyl bromide (2.0 mL, 25 mmol) was then

added dropwise at 60 °C over about 1 h. The reaction was kept at the same temperature until the yellow solution turned cloudy. This solution was cooled to -30 °C and a solution of butyraldehyde (6 mmol) in Et<sub>2</sub>O (12 ml) was added dropwise. After addition the reaction was moved to room temperature for further 30 min then quenched with sat. NH<sub>4</sub>Cl (aq). The aqueous layer was extracted with ether and the extracts were combined with the above organic layer. The combined solution was dried over Na<sub>2</sub>SO<sub>4</sub>. After evaporation of the solvent the residue was purified by column chromatography (silica gel, appropriate mixture of *n*-hexane/ethyl acetate) to afford S<sub>2</sub>.

To a dried schlenk flask was added S<sub>2</sub> (10.0 mmol), Pd(PPh<sub>3</sub>)<sub>2</sub>Cl<sub>2</sub> (0.2 mmol), CuI (0.4 mmol), iodoarene (11.0 mmol) and freshly distilled Et<sub>3</sub>N (50 ml) under argon. The resulting mixture was stirred for 16 h at rt. The reaction mixture was quenched with sat. NH<sub>4</sub>Cl (aq) and 50 mL of ethyl acetate were added and the mixture filtered. After removal of solvent using rotary evaporator, the crude compound was purified by column chromatography on silica gel to give **1w**.

### General procedure for synthesis of *S*-substituted furans from homopropargylic alcohols and sulfonylhydrazines:

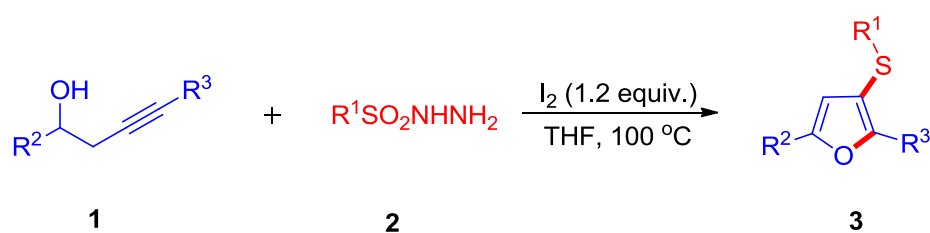

The homopropargylic alcohols (**1**, 0.3 mmol), sulfonylhydrazines (**2**, 0.45 mmol), iodine (0.36 mmol), were mixed in THF (2 mL) and this mixture was carried out under N<sub>2</sub> at 100 °C for 12 h. The reaction mixture was cooled to room temperature and then washed with saturated sodium thiosulfate (5 mL), extracted with ethyl acetate (15 ml×3). The combined organic phase was dried over anhydrous Na<sub>2</sub>SO<sub>4</sub>. The solvent was evaporated in vacuo and the crude product was purified by column

chromatography, eluting with petroleum ether/EtOAc (40:1) to afford the desired Sulfanylfurans **3**.

### The data of products:

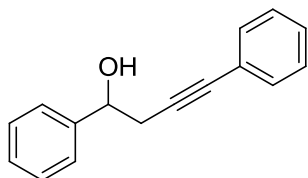

#### 1,4-diphenylbut-3-yn-1-ol (**1a**)

Yellow solid.  $^1\text{H}$  NMR (400 MHz,  $\text{CDCl}_3$ , ppm):  $\delta$  = 7.42-7.25 (m, 10 H), 4.92-4.89 (m, 1 H), 2.82 (d,  $J$  = 4.0 Hz, 2 H), 2.61 (s, 1 H);  $^{13}\text{C}$  NMR (100 MHz,  $\text{CDCl}_3$ , ppm):  $\delta$  = 142.78, 131.72, 128.49, 128.31, 128.04, 127.96, 125.88, 123.33, 86.12, 83.24, 72.66, 30.61.

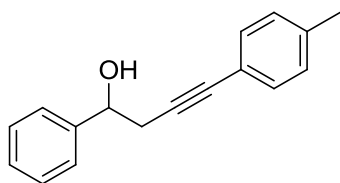

#### 1-phenyl-4-(p-tolyl)but-3-yn-1-ol (**1b**)

Yellow solid.  $^1\text{H}$  NMR (400 MHz,  $\text{CDCl}_3$ , ppm):  $\delta$  = 7.43-7.41 (m, 2 H), 7.38-7.34 (m, 2 H), 7.31-7.28 (m, 3 H), 7.08 (d,  $J$  = 8.0 Hz, 2 H), 4.94-4.90 (m, 1 H), 2.83 (d,  $J$  = 4.0 Hz, 2 H), 2.59 (d,  $J$  = 4.0 Hz, 1 H), 2.33 (s, 3 H);  $^{13}\text{C}$  NMR (100 MHz,  $\text{CDCl}_3$ , ppm):  $\delta$  = 142.85, 138.16, 131.70, 131.63, 129.16, 129.08, 128.56, 127.98, 125.93, 120.27, 85.32, 83.43, 72.81, 30.77, 21.57.

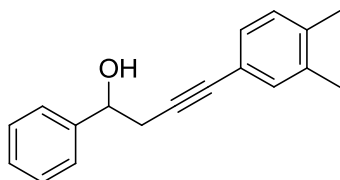

#### 4-(3,4-dimethylphenyl)-1-phenylbut-3-yn-1-ol (**1c**)

Yellow solid.  $^1\text{H}$  NMR (400 MHz,  $\text{CDCl}_3$ , ppm):  $\delta$  = 7.44-7.41 (m, 2 H), 7.38-7.36 (m, 2 H), 7.35-7.30 (m, 1 H), 7.17-7.10 (m, 1 H), 7.14-7.12 (m, 1 H) 7.04 (d,  $J$  = 8.0 Hz, 1 H), 4.93-4.91 (m, 1 H), 2.84-2.82 (m, 2 H), 2.57 (s, 1 H), 2.24 (s, 3 H), 2.21 (s, 3 H);  $^{13}\text{C}$  NMR (100 MHz,  $\text{CDCl}_3$ , ppm):  $\delta$  = 142.85, 136.97, 136.66, 132.82, 129.67,

129.18, 128.53, 127.97, 125.92, 120.54, 84.99, 83.57, 72.77, 30.81, 19.82, 19.67.

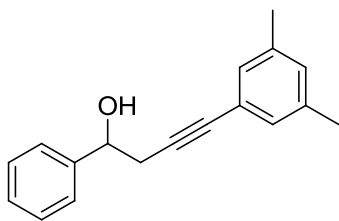

**4-(3,5-dimethylphenyl)-1-phenylbut-3-yn-1-ol (1d)**

Yellow solid.  $^1\text{H}$  NMR (400 MHz,  $\text{CDCl}_3$ , ppm):  $\delta$  = 7.41 (d,  $J$  = 4.0 Hz, 2 H), 7.37-7.34 (m, 2 H), 7.31-7.29 (m, 1 H), 7.02 (s, 2 H), 6.91 (s, 1 H), 4.92-4.84 (m, 1 H), 2.82 (d,  $J$  = 4.0 Hz, 2 H), 2.58-2.55 (m, 1 H), 2.26 (s, 6 H);  $^{13}\text{C}$  NMR (100 MHz,  $\text{CDCl}_3$ , ppm):  $\delta$  = 142.84, 137.91, 130.04, 129.47, 128.54, 127.98, 125.92, 122.94, 85.30, 83.63, 72.76, 30.77, 21.20.

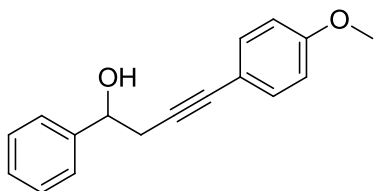

**4-(4-methoxyphenyl)-1-phenylbut-3-yn-1-ol (1e)**

Yellow solid.  $^1\text{H}$  NMR (400 MHz,  $\text{CDCl}_3$ , ppm):  $\delta$  = 7.43-7.41 (m, 2 H), 7.37-7.32 (m, 2 H), 7.30-7.23 (m, 3 H), 6.80 (d,  $J$  = 8.8 Hz, 2 H), 4.93-4.89 (m, 1 H), 3.77 (s, 3 H), 2.83-2.81 (m, 2 H), 2.54 (d,  $J$  = 3.2 Hz, 1 H);  $^{13}\text{C}$  NMR (100 MHz,  $\text{CDCl}_3$ , ppm):  $\delta$  = 159.39, 142.79, 133.06, 128.44, 127.89, 125.83, 115.39, 113.90, 84.40, 83.08, 72.66, 55.28, 30.70.

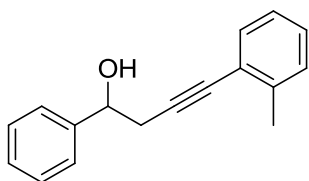

**1-phenyl-4-(o-tolyl)but-3-yn-1-ol (1f)**

Yellow solid.  $^1\text{H}$  NMR (400 MHz,  $\text{CDCl}_3$ , ppm):  $\delta$  = 7.43 (d,  $J$  = 8.0 Hz, 2 H), 7.37-7.28 (m, 3 H), 7.22-7.19 (m, 1 H), 7.17-7.10 (m, 2 H), 7.09-7.07 (m, 1 H), 4.95-4.91 (m, 1 H), 2.91 (d,  $J$  = 6.0 Hz, 2 H), 2.49 (d,  $J$  = 3.2 Hz, 1 H), 2.32 (s, 3 H);  $^{13}\text{C}$  NMR (100 MHz,  $\text{CDCl}_3$ , ppm):  $\delta$  = 142.73, 140.16, 132.02, 129.38, 128.48, 128.00, 127.94, 125.92, 125.50, 123.06, 89.75, 82.16, 72.70, 30.64, 20.71.

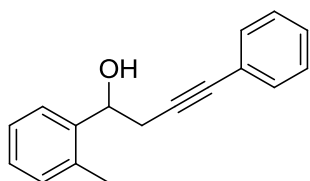

**4-phenyl-1-(o-tolyl)but-3-yn-1-ol (1g)**

Yellow solid.  $^1\text{H}$  NMR (400 MHz,  $\text{CDCl}_3$ , ppm):  $\delta$  = 7.46 (d,  $J$  = 8.0 Hz, 1 H), 7.31-7.29 (m, 2 H), 7.19-7.04 (m, 6 H), 5.09-5.06 (m, 1 H), 2.72 (d,  $J$  = 4.0 Hz, 2 H), 2.51 (s, 1 H), 2.28 (s, 3 H);  $^{13}\text{C}$  NMR (100 MHz,  $\text{CDCl}_3$ , ppm):  $\delta$  = 140.92, 134.75, 131.87, 131.74, 130.60, 130.42, 128.32, 126.38, 125.37, 125.42, 86.40, 83.06, 69.25, 29.51, 19.32.

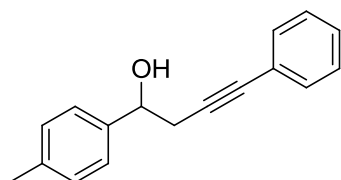

**4-phenyl-1-(p-tolyl)but-3-yn-1-ol (1h)**

Yellow solid.  $^1\text{H}$  NMR (400 MHz,  $\text{CDCl}_3$ , ppm):  $\delta$  = 7.40-7.37 (m, 2 H), 7.32 (d,  $J$  = 8.0 Hz, 2 H), 7.29-7.27 (m, 3 H), 7.24-7.17 (m, 2 H), 4.94-4.92 (m, 1 H), 2.84 (d,  $J$  = 8.0 Hz, 2 H), 2.42 (d,  $J$  = 4.0 Hz, 1 H), 2.35 (s, 3 H);  $^{13}\text{C}$  NMR (100 MHz,  $\text{CDCl}_3$ , ppm):  $\delta$  = 139.85, 137.72, 131.93, 131.59, 129.45, 128.99, 128.55, 128.13, 127.85, 126.02, 125.64, 123.39, 86.21, 83.21, 72.82, 30.69.

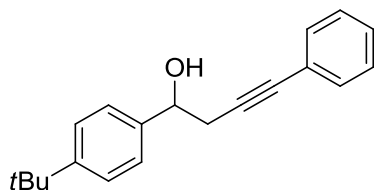

**1-(4-(tert-butyl)phenyl)-4-phenylbut-3-yn-1-ol (1i)**

Yellow solid.  $^1\text{H}$  NMR (400 MHz,  $\text{CDCl}_3$ , ppm):  $\delta$  = 7.41-7.36 (m, 6 H), 7.29-7.27 (m, 3 H), 4.95-4.91 (m, 1 H), 2.86 (d,  $J$  = 6.4 Hz, 2 H), 2.40 (d,  $J$  = 3.6 Hz, 1 H), 1.32 (s, 9 H);  $^{13}\text{C}$  NMR (100 MHz,  $\text{CDCl}_3$ , ppm):  $\delta$  = 150.92, 139.3, 131.68, 128.24, 127.97, 125.55, 125.39, 123.34, 86.26, 83.13, 72.45, 34.57, 31.36, 30.48.

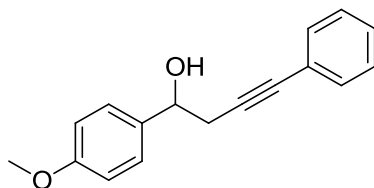

**1-(4-methoxyphenyl)-4-phenylbut-3-yn-1-ol (1j)**

Yellow solid.  $^1\text{H}$  NMR (400 MHz,  $\text{CDCl}_3$ , ppm):  $\delta$  = 7.40-7.35 (m, 4 H), 7.29-7.27 (m, 3 H), 6.92-6.89 (m, 2 H), 4.93-4.89 (m, 1 H), 3.81 (s, 3 H), 2.85-2.83 (m, 2 H), 2.41 (s, 1 H);  $^{13}\text{C}$  NMR (100 MHz,  $\text{CDCl}_3$ , ppm):  $\delta$  = 159.38, 135.00, 131.79, 128.36, 127.20, 127.10, 113.95, 113.87, 86.21, 83.21, 72.48, 55.46, 30.67.

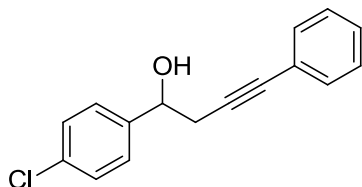**1-(4-chlorophenyl)-4-phenylbut-3-yn-1-ol (1k)**

Yellow solid.  $^1\text{H}$  NMR (400 MHz,  $\text{CDCl}_3$ , ppm):  $\delta$  = 7.36-7.26 (m, 9 H), 4.90-4.87 (m, 1 H), 2.80 (d,  $J$  = 6.4 Hz, 2 H), 2.67 (d,  $J$  = 2.0 Hz, 1 H);  $^{13}\text{C}$  NMR (100 MHz,  $\text{CDCl}_3$ , ppm):  $\delta$  = 141.20, 133.59, 131.67, 128.58, 128.33, 128.15, 127.28, 123.11, 85.54, 83.51, 71.94, 30.58.

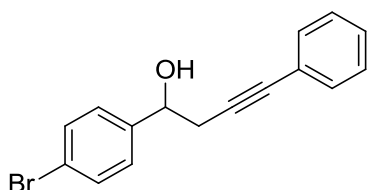**1-(4-bromophenyl)-4-phenylbut-3-yn-1-ol (1l)**

Yellow solid.  $^1\text{H}$  NMR (400 MHz,  $\text{CDCl}_3$ , ppm):  $\delta$  = 7.49 (d,  $J$  = 8.4 Hz, 2 H), 7.38-7.36 (m, 2 H), 7.31-7.27 (m, 5 H), 4.93-4.87 (m, 1 H), 2.83-2.81 (m, 2 H), 2.53 (d,  $J$  = 3.6 Hz, 1 H);  $^{13}\text{C}$  NMR (100 MHz,  $\text{CDCl}_3$ , ppm):  $\delta$  = 141.68, 131.67, 131.53, 128.32, 128.15, 127.59, 123.07, 121.75, 85.41, 83.57, 71.97, 30.56.

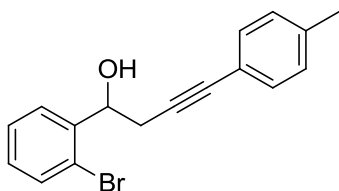**1-(2-bromophenyl)-4-(p-tolyl)but-3-yn-1-ol (1m)**

Yellow solid.  $^1\text{H}$  NMR (400 MHz,  $\text{CDCl}_3$ , ppm):  $\delta$  = 7.68-7.65 (m, 1 H), 7.55-7.53 (m, 1 H), 7.39-7.35 (m, 1 H), 7.31 (d,  $J$  = 8.0 Hz, 2 H), 7.19-7.17 (m, 1 H), 7.16-7.09 (m, 2 H), 5.32-5.28 (m, 1 H), 3.06-3.00 (m, 1 H), 2.79 (s, 3 H), 2.64-2.63 (m, 1 H), 2.34 (s, 3 H);  $^{13}\text{C}$  NMR (100 MHz,  $\text{CDCl}_3$ , ppm):  $\delta$  = 141.55, 138.23, 132.82, 132.63, 131.81, 131.54, 129.27, 128.97, 127.56, 121.90, 120.13, 84.66, 83.67, 71.14, 29.02, 21.59.

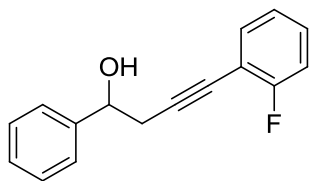

**4-(2-fluorophenyl)-1-phenylbut-3-yn-1-ol (1n)**

Yellow solid.  $^1\text{H}$  NMR (400 MHz,  $\text{CDCl}_3$ , ppm):  $\delta$  = 7.45-7.31 (m, 7 H), 7.01- 6.96 (m, 2 H), 4.97-4.93 (m, 1 H), 2.95 (d,  $J$  = 6.4 Hz, 2 H), 2.47 (d,  $J$  = 2.4 Hz, 1 H);  $^{13}\text{C}$  NMR (100 MHz,  $\text{CDCl}_3$ , ppm):  $\delta$  = 162.32 (d,  $J$  = 248 Hz, 1 C), 142.69, 133.50 (d,  $J$  = 8 Hz, 2 C), 128.49, 127.99, 125.80, 119.36, 119.33, 115.50 (d,  $J$  = 23 Hz, 2 C), 85.70 (d,  $J$  = 2 Hz, 1 C), 82.11, 72.63, 30.49.

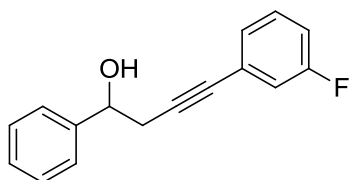

**4-(3-fluorophenyl)-1-phenylbut-3-yn-1-ol (1o)**

Yellow solid.  $^1\text{H}$  NMR (400 MHz,  $\text{CDCl}_3$ , ppm):  $\delta$  = 7.43-7.37 (m, 4 H), 7.35-7.31 (m, 1 H), 7.29-7.20 (m, 1 H), 7.15 (d,  $J$  = 8.0 Hz, 1 H), 7.06 (d,  $J$  = 2.4 Hz, 1 H) 7.01-6.97 (m, 1 H), 4.95-4.91 (m, 1 H), 2.85 (d,  $J$  = 8.0 Hz, 2 H), 2.60 (s, 1 H), 2.02 (s, 3 H);  $^{13}\text{C}$  NMR (100 MHz,  $\text{CDCl}_3$ , ppm):  $\delta$  = 162.41 (d,  $J$  = 245 Hz, 1 C), 142.74, 129.90, 128.60, 128.12, 127.61, 125.92, 125.25 (d,  $J$  = 10 Hz, 1 C), 118.74, 118.63, 118.46 (d,  $J$  = 10 Hz, 1 C), 115.43 (d,  $J$  = 25 Hz, 1 C), 87.36, 82.04, 72.68 (d,  $J$  = 5 Hz, 1 C), 30.51.

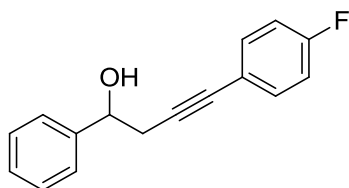

**4-(4-fluorophenyl)-1-phenylbut-3-yn-1-ol (1p)**

Yellow solid.  $^1\text{H}$  NMR (400 MHz,  $\text{CDCl}_3$ , ppm):  $\delta$  = 7.45-7.31 (m, 7 H), 7.01- 6.96 (m, 2 H), 4.97-4.93 (m, 1 H), 2.85 (d,  $J$  = 6.4 Hz, 2 H), 2.47 (d,  $J$  = 2.4 Hz, 1 H);  $^{13}\text{C}$  NMR (100 MHz,  $\text{CDCl}_3$ , ppm):  $\delta$  = 162.32 (d,  $J$  = 248 Hz, 1 C), 142.69, 133.50 (d,  $J$  = 8 Hz, 1 C), 128.49, 127.99, 125.80, 119.34 (d,  $J$  = 3 Hz, 1 C), 115.49 (d,  $J$  = 23 Hz, 2 C), 85.70 (d,  $J$  = 2 Hz, 1 C), 82.11, 72.63, 30.49.

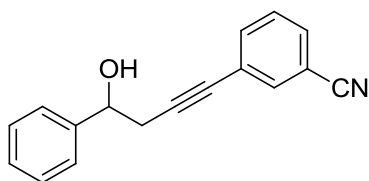

**3-(4-hydroxy-4-phenylbut-1-yn-1-yl)benzonitrile (1q)**

Yellow solid.  $^1\text{H}$  NMR (400 MHz,  $\text{CDCl}_3$ , ppm):  $\delta$  = 7.60 (d,  $J$ =12.0 Hz, 1 H), 7.44-7.55(m, 2 H), 7.37-7.42 (m, 5 H), 7.31-7.34(m, 1 H), 4.95-4.98 (m, 1 H), 2.87-2.89 (m, 2 H), 2.46(s, 1 H);  $^{13}\text{C}$  NMR (100 MHz,  $\text{CDCl}_3$ , ppm):  $\delta$  = 142.64, 135.82, 135.14, 135.04, 131.19, 129.17, 128.55, 125.95, 125.04, 118.22, 112.76, 89.20, 80.88, 72.74, 30.40.

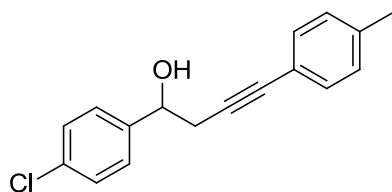

**1-(4-chlorophenyl)-4-(p-tolyl)but-3-yn-1-ol (1r)**

Yellow solid.  $^1\text{H}$  NMR (400 MHz,  $\text{CDCl}_3$ , ppm):  $\delta$  = 7.35-7.32 (m, 4 H), 7.27 (d,  $J$  = 8.0 Hz, 2 H), 7.10 (d,  $J$  = 8.0 Hz, 2 H), 4.93-4.91 (m, 1 H), 2.82-2.80 (m, 2 H), 2.58 (s, 1 H), 2.34 (s, 3 H);  $^{13}\text{C}$  NMR (100 MHz,  $\text{CDCl}_3$ , ppm):  $\delta$  = 141.27, 138.31, 133.63, 131.74, 131.49, 129.29, 129.02, 128.77, 128.51, 127.45, 127.20, 120.04, 84.72, 83.73, 72.16, 30.76, 21.59.

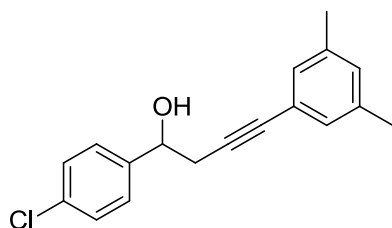

**1-(4-chlorophenyl)-4-(3,5-dimethylphenyl)but-3-yn-1-ol (1s)**

Yellow solid.  $^1\text{H}$  NMR (400 MHz,  $\text{CDCl}_3$ , ppm):  $\delta$  = 7.38-7.32 (m, 4 H), 7.01 (s, 2 H), 6.94 (s, 1 H), 4.92-4.88 (m, 1 H), 2.82-2.80 (m, 2 H), 2.54 (s, 1 H), 2.28 (s, 3 H);  $^{13}\text{C}$  NMR (100 MHz,  $\text{CDCl}_3$ , ppm):  $\delta$  = 141.26, 137.96, 133.63, 130.20, 129.49, 129.38, 128.66, 127.31, 122.71, 84.70, 83.95, 72.35, 30.75, 21.20.

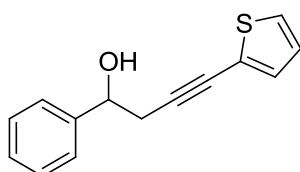

1-phenyl-4-(thiophen-2-yl)but-3-yn-1-ol (**1t**)

Yellow solid.  $^1\text{H}$  NMR (400 MHz,  $\text{CDCl}_3$ , ppm):  $\delta$  = 7.44-7.31 (m, 5 H), 7.20-7.14 (m, 2 H), 6.95-6.93 (m, 1 H), 4.94-4.92 (m, 1 H), 2.87 (d,  $J$  = 6.0 Hz, 1 H), 2.54 (s, 1 H);  $^{13}\text{C}$  NMR (100 MHz,  $\text{CDCl}_3$ , ppm):  $\delta$  = 142.64, 131.64, 128.51, 128.00, 126.85, 126.53, 125.80, 95.23, 90.23, 72.55, 30.86.

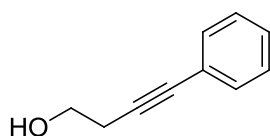

4-phenylbut-3-yn-1-ol (**1u**)

Colorless oil.  $^1\text{H}$  NMR (400 MHz,  $\text{CDCl}_3$ , ppm):  $\delta$  = 7.43-7.40 (m, 2 H), 7.29-7.28 (m, 3 H), 3.82-4.79 (m, 2 H), 2.70-2.67 (m, 2 H), 2.11 (s, 1 H);  $^{13}\text{C}$  NMR (100 MHz,  $\text{CDCl}_3$ , ppm):  $\delta$  = 131.67, 128.27, 127.95, 123.35, 86.40, 82.46, 61.17, 23.82.

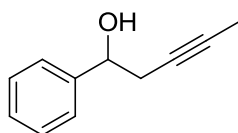

1-phenylpent-3-yn-1-ol (**1v**)

Colorless oil.  $^1\text{H}$  NMR (400 MHz,  $\text{CDCl}_3$ , ppm):  $\delta$  = 7.38-7.32 (m, 4 H), 7.30-7.27 (m, 1 H), 4.81-4.78 (m, 1 H), 2.58-2.54 (m, 2 H), 2.51 (s, 1 H), 1.81-1.79 (s, 3 H);  $^{13}\text{C}$  NMR (100 MHz,  $\text{CDCl}_3$ , ppm):  $\delta$  = 142.81, 128.35, 127.71, 125.68, 78.63, 75.23, 72.58, 29.96, 3.49.

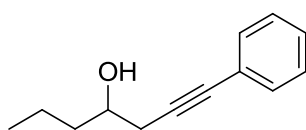

1-phenylhept-1-yn-4-ol (**1w**)

Colorless oil.  $^1\text{H}$  NMR (400 MHz,  $\text{CDCl}_3$ , ppm):  $\delta$  = 7.42-7.40 (m, 2 H), 7.29-7.27 (m, 3 H), 3.87-3.81 (m, 1 H), 2.67-2.51 (m, 2 H), 2.06 (d,  $J$  = 4.4 Hz, 1 H), 1.61-1.34 (m, 4 H), 0.97-0.94 (m, 3 H);  $^{13}\text{C}$  NMR (100 MHz,  $\text{CDCl}_3$ , ppm):  $\delta$  = 131.67, 128.26, 127.91, 123.43, 86.26, 83.01, 69.97, 38.55, 28.44, 18.88, 14.03.

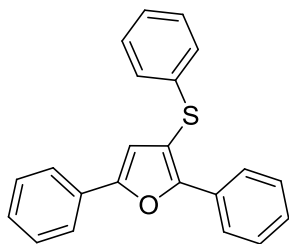

**2,5-diphenyl-3-(phenylthio)furan (3aa)**

colorless oil.  $^1\text{H}$  NMR (400 MHz,  $\text{CDCl}_3$ , ppm):  $\delta$  = 8.09-8.07 (m, 2 H), 7.73-7.71 (m, 2 H), 7.43-7.39 (m, 4 H), 7.33-7.24 (m, 6 H), 7.17-7.14 (m, 1 H), 6.71 (s, 1 H);  $^{13}\text{C}$  NMR (100 MHz,  $\text{CDCl}_3$ , ppm):  $\delta$  = 153.60, 152.84, 136.77, 130.10, 129.99, 129.13, 128.81, 128.72, 128.54, 128.18, 127.98, 125.97, 125.86, 123.91, 112.68, 111.63; HRMS calcd for  $\text{C}_{22}\text{H}_{16}\text{OS}$   $[\text{M}+\text{H}]^+$  329.0995; found: 329.0999.

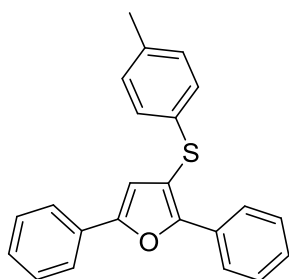

**2,5-diphenyl-3-(p-tolylthio)furan (3ab)**

Colorless oil.  $^1\text{H}$  NMR (400 MHz,  $\text{CDCl}_3$ , ppm):  $\delta$  = 8.07 (d,  $J$  = 7.2 Hz, 2 H), 7.69 (d,  $J$  = 7.2 Hz, 2 H), 7.42-7.36 (m, 4 H), 7.31-7.29 (m, 2 H), 7.25-7.19 (m, 2 H), 7.07 (d,  $J$  = 8.0 Hz, 2 H), 6.66 (s, 1 H), 2.29 (s, 3 H);  $^{13}\text{C}$  NMR (100 MHz,  $\text{CDCl}_3$ , ppm):  $\delta$  = 152.87, 152.71, 136.08, 132.85, 130.23, 130.05, 129.94, 128.79, 128.54, 128.16, 128.03, 127.92, 125.90, 123.89, 112.76, 112.39, 21.00; HRMS calcd for  $\text{C}_{23}\text{H}_{18}\text{OS}$   $[\text{M}+\text{H}]^+$  343.1151; found: 343.1157.

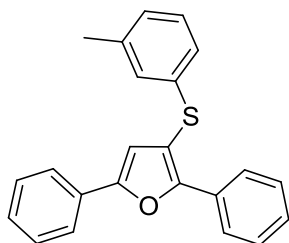

**2,5-diphenyl-3-(m-tolylthio)furan (3ac)**

Colorless oil.  $^1\text{H}$  NMR (400 MHz,  $\text{CDCl}_3$ , ppm):  $\delta$  = 8.09-8.07 (m, 2 H), 7.73-7.71 (m, 2 H), 7.42-7.27 (m, 6 H), 7.22-7.07 (m, 3 H), 6.96 (d,  $J$  = 8.0 Hz, 1 H), 6.71 (s, 1 H), 2.28 (s, 3 H);  $^{13}\text{C}$  NMR (100 MHz,  $\text{CDCl}_3$ , ppm):  $\delta$  = 153.56, 152.87, 139.11, 136.55, 130.24, 130.12, 128.96, 128.81, 128.16, 127.92, 127.05, 126.81, 126.00,

124.72, 123.99, 112.87, 112.76, 111.90, 21.49; HRMS calcd for  $C_{23}H_{18}OS$   $[M+H]^+$  343.1151; found: 343.1156.

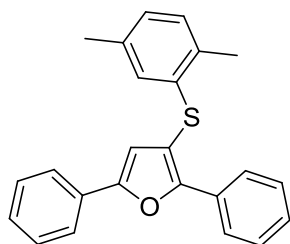

**3-((2,5-dimethylphenyl)thio)-2,5-diphenylfuran (3ad)**

Colorless oil.  $^1H$  NMR (400 MHz,  $CDCl_3$ , ppm):  $\delta$  = 8.06-8.04 (m, 2 H), 7.71-7.69 (m, 2 H), 7.41-7.39 (m, 4 H), 7.37-7.30 (m, 2 H), 7.28-7.22 (m, 1 H), 7.21 (s, 1 H), 7.05 (d,  $J$  = 8.0 Hz, 1 H), 6.61 (s, 1 H), 2.38 (s, 3 H), 2.19 (s, 3 H);  $^{13}C$  NMR (100 MHz,  $CDCl_3$ , ppm):  $\delta$  = 152.98, 152.87, 136.46, 135.04, 133.68, 130.35, 130.16, 128.83, 128.55, 128.42, 128.01, 127.07, 125.96, 123.99, 112.41, 112.27, 21.15, 19.86; HRMS calcd for  $C_{24}H_{20}OS$   $[M+H]^+$  357.1308; found: 357.1301.

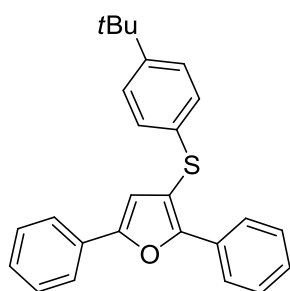

**3-((4-(tert-butyl)phenyl)thio)-2,5-diphenylfuran (3ae)**

Colorless oil.  $^1H$  NMR (400 MHz,  $CDCl_3$ , ppm):  $\delta$  = 8.10 (d,  $J$  = 8.0 Hz, 2 H), 7.71 (d,  $J$  = 8.0 Hz, 2 H), 7.43-7.40 (m, 4 H), 7.31-7.28 (m, 4 H), 7.24-7.22 (m, 2 H), 6.70 (s, 1 H), 1.28 (s, 9 H);  $^{13}C$  NMR (100 MHz,  $CDCl_3$ , ppm):  $\delta$  = 153.2, 152.80, 149.29, 133.12, 130.31, 128.88, 128.61, 128.15, 128.00, 127.60, 126.30, 126.02, 123.98, 112.68, 112.44, 34.55, 31.38; HRMS calcd for  $C_{26}H_{24}OS$   $[M+H]^+$  385.1621; found: 385.1618.

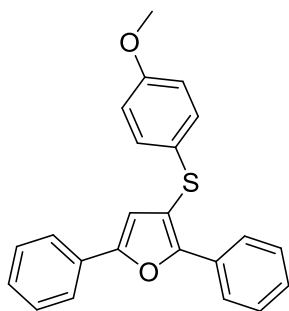

**3-((4-methoxyphenyl)thio)-2,5-diphenylfuran (3af)**

Colorless oil.  $^1\text{H}$  NMR (400 MHz,  $\text{CDCl}_3$ , ppm):  $\delta$  = 8.07 (d,  $J$  = 7.2 Hz, 2 H), 7.68 (d,  $J$  = 7.2 Hz, 2 H), 7.45-7.40 (m, 4 H), 7.38-7.31 (m, 3 H), 7.28 (d,  $J$  = 7.6 Hz, 1 H), 6.84 (d,  $J$  = 8.8 Hz, 2 H), 6.59 (s, 1 H), 3.77 (s, 3 H);  $^{13}\text{C}$  NMR (100 MHz,  $\text{CDCl}_3$ , ppm):  $\delta$  = 158.88, 152.58, 151.53, 131.21, 130.36, 130.05, 128.76, 128.54, 127.86, 127.84, 126.39, 125.76, 123.87, 114.89, 114.59, 111.67, 55.38; HRMS calcd for  $\text{C}_{23}\text{H}_{18}\text{O}_2\text{S}$   $[\text{M}+\text{H}]^+$  359.1101; found: 359.1107.

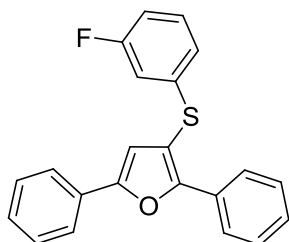

**3-((3-fluorophenyl)thio)-2,5-diphenylfuran (3ag)**

White solid. melting point: 84-86 °C.  $^1\text{H}$  NMR (400 MHz,  $\text{CDCl}_3$ , ppm):  $\delta$  = 8.06 (d,  $J$  = 7.2 Hz, 2 H), 7.73 (d,  $J$  = 7.2 Hz, 2 H), 7.44-7.40 (m, 4 H), 7.34-7.29 (m, 2 H), 7.24-7.18 (m, 1 H), 7.05-7.04 (m, 1 H), 7.03-6.93 (m, 1 H), 6.85-6.80 (m, 1 H), 6.75 (s, 1 H);  $^{13}\text{C}$  NMR (100 MHz,  $\text{CDCl}_3$ , ppm):  $\delta$  = 163.19 (d,  $J$  = 247 Hz, 1 C), 154.33, 153.11, 139.55 (d,  $J$  = 7 Hz, 1 C), 130.41, 130.32, 129.84, 128.84, 128.59, 128.44, 128.13, 136.05, 123.96, 122.31 (d,  $J$  = 3 Hz, 1 C), 113.66 (d,  $J$  = 24 Hz, 2 C), 112.74 (d,  $J$  = 4 Hz, 1 C), 110.18; HRMS calcd for  $\text{C}_{22}\text{H}_{15}\text{FOS}$   $[\text{M}+\text{H}]^+$  347.0901; found: 347.0905.

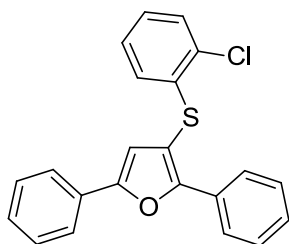

**3-((2-chlorophenyl)thio)-2,5-diphenylfuran (3ah)**

Colorless oil.  $^1\text{H}$  NMR (400 MHz,  $\text{CDCl}_3$ , ppm):  $\delta$  = 8.06-8.04 (m, 2 H), 7.44-7.42 (m, 2 H), 7.40-7.32 (m, 5 H), 7.31-7.29 (m, 2 H), 7.08-7.01 (m, 3 H), 6.74 (s, 1 H);  $^{13}\text{C}$  NMR (100 MHz,  $\text{CDCl}_3$ , ppm):  $\delta$  = 154.96, 153.20, 136.42, 131.20, 129.85, 129.78, 129.65, 128.78, 128.62, 128.49, 128.14, 127.35, 127.00, 126.28, 126.04, 123.94, 113.00, 109.46; HRMS calcd for  $\text{C}_{22}\text{H}_{15}\text{ClOS}$   $[\text{M}+\text{H}]^+$  363.0605; found: 363.0601.

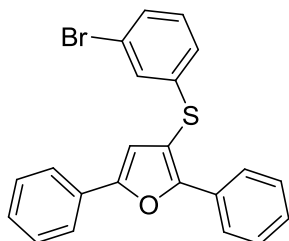

**3-((3-bromophenyl)thio)-2,5-diphenylfuran (3ai)**

Colorless oil.  $^1\text{H}$  NMR (400 MHz,  $\text{CDCl}_3$ , ppm):  $\delta$  = 8.07-8.05 (m, 2 H), 7.75-7.73 (m, 2 H), 7.45-7.32 (m, 8 H), 7.17-7.11 (m, 2 H), 6.74 (s, 1 H);  $^{13}\text{C}$  NMR (100 MHz,  $\text{CDCl}_3$ , ppm):  $\delta$  = 154.35, 153.21, 139.54, 130.49, 129.90, 129.37, 128.94, 128.86, 128.69, 128.53, 128.22, 126.12, 125.42, 124.04, 123.81, 123.23, 112.69, 110.21; HRMS calcd for  $\text{C}_{22}\text{H}_{15}\text{BrOS}$   $[\text{M}+\text{H}]^+$  407.0100; found: 407.0108.

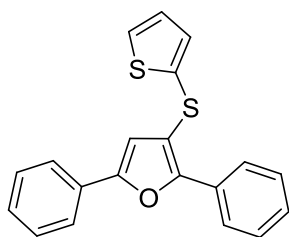

**2,5-diphenyl-3-(thiophen-2-ylthio)furan (3ak)**

Colorless oil.  $^1\text{H}$  NMR (400 MHz,  $\text{CDCl}_3$ , ppm):  $\delta$  = 8.06 (d,  $J$  = 7.2 Hz, 2 H), 7.67 (d,  $J$  = 7.2 Hz, 2 H), 7.49-7.40 (m, 2 H), 7.38-7.29 (m, 4 H), 7.27-7.26 (m, 1 H), 7.24-7.23 (m, 1 H), 7.10-6.99 (m, 1 H), 6.61 (s, 1 H);  $^{13}\text{C}$  NMR (100 MHz,  $\text{CDCl}_3$ , ppm):  $\delta$  = 152.49, 150.23, 133.34, 132.88, 130.26, 129.98, 129.49, 128.72, 128.57, 127.88, 127.59, 125.82, 123.89, 116.19, 110.60; HRMS calcd for  $\text{C}_{20}\text{H}_{14}\text{OS}_2$   $[\text{M}+\text{H}]^+$  335.0559; found: 335.0553.

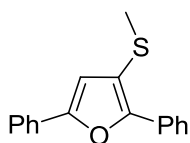

**3-(methylthio)-2,5-diphenylfuran (3al)**

Colorless oil.  $^1\text{H}$  NMR (400 MHz,  $\text{CDCl}_3$ , ppm):  $\delta$  = 8.03-8.01 (m, 2 H), 7.74-7.72 (m,

2 H), 7.46-7.39 (m, 5 H), 7.31-7.27 (m, 1 H), 6.78 (s, 1 H), 2.47 (s, 3 H);  $^{13}\text{C}$  NMR (100 MHz,  $\text{CDCl}_3$ , ppm):  $\delta$  = 152.42, 149.49, 130.71, 128.78, 128.75, 128.50, 127.79, 127.37, 125.46, 123.84, 116.95, 109.75, 18.27; HRMS calcd for  $\text{C}_{17}\text{H}_{14}\text{OS}$   $[\text{M}+\text{H}]^+$  267.0838; found: 267.0839.

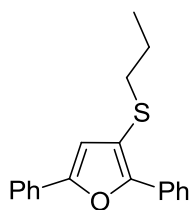

**2,5-diphenyl-3-(propylthio)furan (3am)**

Colorless oil.  $^1\text{H}$  NMR (400 MHz,  $\text{CDCl}_3$ , ppm):  $\delta$  = 8.11-8.09 (m, 2 H), 7.73-7.71 (m, 2 H), 7.45-7.38 (m, 4 H), 7.31-7.27 (m, 2 H), 6.76 (s, 1 H), 2.84-2.80 (m, 2 H), 1.71-1.61 (m, 2 H), 7.31-7.27 (m, 3 H);  $^{13}\text{C}$  NMR (100 MHz,  $\text{CDCl}_3$ , ppm):  $\delta$  = 152.26, 150.86, 130.78, 130.21, 128.77, 128.43, 127.76, 127.45, 125.64, 123.84, 115.64, 111.17, 107.23, 37.45, 22.90, 13.33; HRMS calcd for  $\text{C}_{19}\text{H}_{18}\text{OS}$   $[\text{M}+\text{H}]^+$  295.1151; found: 295.1157.

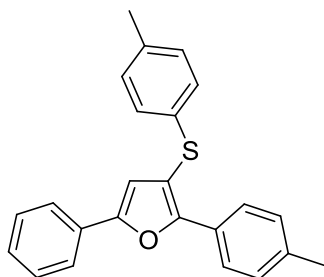

**5-phenyl-2-(p-tolyl)-3-(p-tolylthio)furan (3bb)**

Colorless oil.  $^1\text{H}$  NMR (400 MHz,  $\text{CDCl}_3$ , ppm):  $\delta$  = 8.01 (d,  $J$  = 8.4 Hz, 2 H), 7.74 (d,  $J$  = 7.2 Hz, 2 H), 7.45-7.41 (m, 2 H), 7.33-7.32 (m, 5 H), 7.11 (d,  $J$  = 8.0 Hz, 2 H), 6.71 (s, 1 H), 2.41 (s, 3 H), 2.33 (s, 3 H);  $^{13}\text{C}$  NMR (100 MHz,  $\text{CDCl}_3$ , ppm):  $\delta$  = 153.42, 152.36, 138.08, 135.89, 133.11, 130.13, 129.88, 129.22, 128.76, 127.91, 127.78, 127.47, 125.88, 123.81, 112.44, 111.69, 21.39, 20.98; HRMS calcd for  $\text{C}_{24}\text{H}_{20}\text{OS}$   $[\text{M}+\text{H}]^+$  357.1308; found: 357.1304.

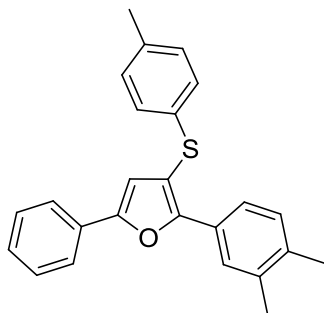

**2-(3,4-dimethylphenyl)-5-phenyl-3-(p-tolylthio)furan (3cb)**

Colorless oil.  $^1\text{H}$  NMR (400 MHz,  $\text{CDCl}_3$ , ppm):  $\delta$  = 7.82 (d,  $J$  = 8.0 Hz, 2 H), 7.71-7.69 (m, 2 H), 7.41-7.37 (m, 3 H), 7.29-7.27 (m, 1 H), 7.23-7.16 (m, 3 H), 7.10-7.07 (m, 2 H), 6.67 (s, 1 H), 2.29-2.28 (m, 9 H);  $^{13}\text{C}$  NMR (100 MHz,  $\text{CDCl}_3$ , ppm):  $\delta$  = 153.54, 152.36, 136.95, 135.97, 135.29, 130.26, 130.11, 129.66, 129.01, 128.69, 128.35, 127.88, 127.62, 127.06, 123.89, 112.60, 111.80, 21.09, 20.08, 19.80; HRMS calcd for  $\text{C}_{25}\text{H}_{22}\text{OS}$   $[\text{M}+\text{H}]^+$  371.1464; found: 371.1469.

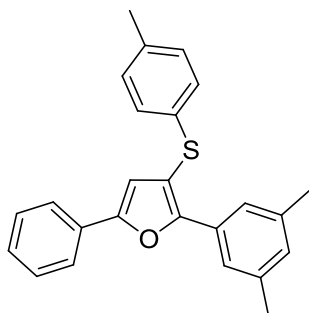

**2-(3,5-dimethylphenyl)-5-phenyl-3-(p-tolylthio)furan (3db)**

Colorless oil.  $^1\text{H}$  NMR (400 MHz,  $\text{CDCl}_3$ , ppm):  $\delta$  = 7.71-7.69 (m, 4 H), 7.41-7.36 (m, 2 H), 7.28 (d,  $J$  = 8.0 Hz, 1 H), 7.22 (d,  $J$  = 8.0 Hz, 2 H), 7.09 (d,  $J$  = 6.8 Hz, 2 H), 6.95 (s, 1 H), 6.64 (s, 1 H), 2.35 (s, 6 H), 2.30 (s, 3 H);  $^{13}\text{C}$  NMR (100 MHz,  $\text{CDCl}_3$ , ppm):  $\delta$  = 152.99, 152.45, 138.00, 136.09, 133.00, 130.15, 130.09, 129.89, 129.84, 128.76, 128.47, 127.80, 123.87, 123.76, 112.78, 112.23, 21.51, 21.01; HRMS calcd for  $\text{C}_{25}\text{H}_{22}\text{OS}$   $[\text{M}+\text{H}]^+$  371.1464; found: 371.1468.

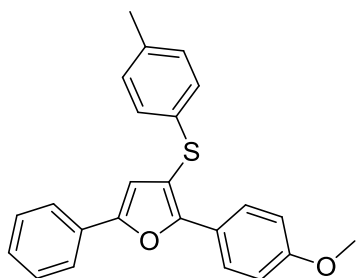

**2-(4-methoxyphenyl)-5-phenyl-3-(p-tolylthio)furan (3eb)**

Colorless oil.  $^1\text{H}$  NMR (400 MHz,  $\text{CDCl}_3$ , ppm):  $\delta$  = 8.02-8.00 (m, 2 H), 7.69-7.67 (m, 2 H), 7.40-7.36 (m, 2 H), 7.28-7.23 (m, 1 H), 7.17 (d,  $J$  = 8.4 Hz, 2 H), 7.06 (d,  $J$  = 8.0 Hz, 2 H), 6.93 (d,  $J$  = 9.2 Hz, 2 H), 6.67 (s, 1 H), 3.82 (s, 3 H), 2.28 (s, 3 H);  $^{13}\text{C}$  NMR (100 MHz,  $\text{CDCl}_3$ , ppm):  $\delta$  = 159.54, 153.65, 152.09, 135.75, 133.32, 130.17, 129.89, 128.77, 127.69, 127.59, 127.51, 123.74, 123.11, 113.99, 112.58, 110.36, 55.33, 20.97; HRMS calcd for  $\text{C}_{24}\text{H}_{20}\text{O}_2\text{S}$   $[\text{M}+\text{H}]^+$  373.1257; found: 373.1261.

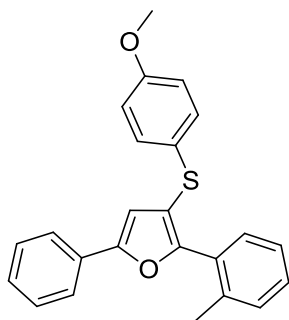

**3-((4-methoxyphenyl)thio)-5-phenyl-2-(o-tolyl)furan (3ff)**

Colorless oil.  $^1\text{H}$  NMR (400 MHz,  $\text{CDCl}_3$ , ppm):  $\delta$  = 7.65 (d,  $J$  = 7.6 Hz, 2 H), 7.51 (d,  $J$  = 7.6 Hz, 1 H), 7.38 (d,  $J$  = 7.6 Hz, 2 H), 7.30-7.26 (m, 6 H), 6.82 (d,  $J$  = 8.8 Hz, 2 H), 6.65 (s, 1 H), 3.78 (s, 3 H), 2.47 (s, 3 H), ;  $^{13}\text{C}$  NMR (100 MHz,  $\text{CDCl}_3$ , ppm):  $\delta$  = 158.68, 154.01, 153.19, 137.50, 130.91, 130.75, 130.40, 130.26, 129.27, 128.99, 128.75, 127.75, 127.06, 125.48, 123.68, 115.35, 114.74, 110.29, 55.37, 20.89; HRMS calcd for  $\text{C}_{24}\text{H}_{20}\text{O}_2\text{S}$   $[\text{M}+\text{H}]^+$  373.1257; found: 373.1251.

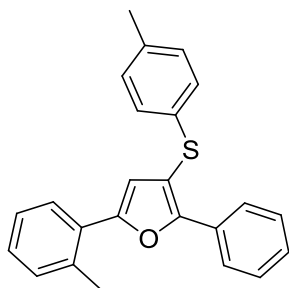

**2-phenyl-5-(o-tolyl)-3-(p-tolylthio)furan (3gb)**

Colorless oil.  $^1\text{H}$  NMR (400 MHz,  $\text{CDCl}_3$ , ppm):  $\delta$  = 8.08 (d,  $J$  = 7.2 Hz, 2 H), 7.77 (d,  $J$  = 7.6 Hz, 1 H), 7.42-7.38 (m, 2 H), 7.32-7.27 (m, 2 H), 7.24-7.19 (m, 4 H), 7.07 (d,  $J$  = 8.0 Hz, 2 H), 6.59 (s, 1 H), 2.52 (s, 3 H), 2.29 (s, 3 H);  $^{13}\text{C}$  NMR (100 MHz,  $\text{CDCl}_3$ , ppm):  $\delta$  = 152.85, 152.46, 135.88, 134.73, 133.08, 131.37, 130.22, 129.92, 129.34, 128.55, 128.05, 127.96, 127.76, 126.87, 126.14, 125.91, 116.02, 111.93, 22.09, 20.98; HRMS calcd for  $\text{C}_{24}\text{H}_{20}\text{OS}$   $[\text{M}+\text{H}]^+$  357.1308; found: 357.1302.

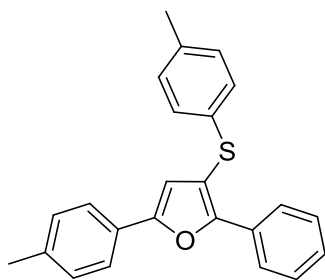

**2-phenyl-5-(p-tolyl)-3-(p-tolylthio)furan (3hb)**

Colorless oil.  $^1\text{H}$  NMR (400 MHz,  $\text{CDCl}_3$ , ppm):  $\delta$  = 8.09-8.07 (m, 2 H), 7.60 (d,  $J$  = 8.4 Hz, 2 H), 7.44-7.40 (m, 2 H), 7.32 (d,  $J$  = 7.6 Hz, 1 H), 7.23-7.19 (m, 4 H), 7.09 (d,  $J$  = 8.0 Hz, 2 H), 6.62 (s, 1 H), 2.38 (s, 3 H), 2.31 (s, 3 H);  $^{13}\text{C}$  NMR (100 MHz,  $\text{CDCl}_3$ , ppm):  $\delta$  = 152.96, 152.51, 137.87, 136.00, 132.93, 130.31, 129.90, 129.46, 128.50, 128.10, 127.89, 127.37, 125.83, 123.86, 112.59, 111.67, 21.35, 20.98; HRMS calcd for  $\text{C}_{24}\text{H}_{20}\text{OS}$   $[\text{M}+\text{H}]^+$  357.1308; found: 357.1314.

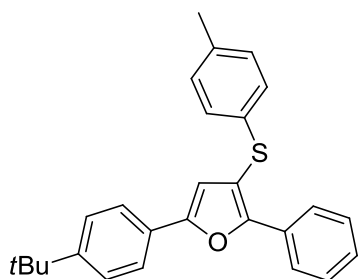

**5-(4-(tert-butyl)phenyl)-2-phenyl-3-(p-tolylthio)furan (3ib)**

Colorless oil.  $^1\text{H}$  NMR (400 MHz,  $\text{CDCl}_3$ , ppm):  $\delta$  = 8.07 (d,  $J$  = 7.2 Hz, 2 H), 7.64 (d,  $J$  = 8.4 Hz, 2 H), 7.44-7.39 (m, 4 H), 7.34-7.28 (m, 1 H), 7.20 (d,  $J$  = 8.4 Hz, 2 H), 7.07 (d,  $J$  = 8.0 Hz, 2 H), 6.63 (s, 1 H), 2.30 (s, 3 H), 1.34 (s, 9 H);  $^{13}\text{C}$  NMR (100 MHz,  $\text{CDCl}_3$ , ppm):  $\delta$  = 152.93, 152.66, 151.14, 135.93, 132.99, 130.31, 129.88, 128.50, 127.95, 127.89, 127.33, 125.83, 125.70, 123.72, 112.47, 111.85, 34.71, 31.26, 20.97; HRMS calcd for  $\text{C}_{27}\text{H}_{26}\text{OS}$   $[\text{M}+\text{H}]^+$  399.1777; found: 399.1782.

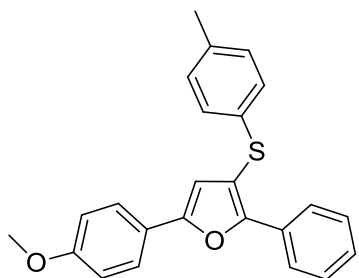

**5-(4-methoxyphenyl)-2-phenyl-3-(p-tolylthio)furan (3jb)**

Colorless oil.  $^1\text{H}$  NMR (400 MHz,  $\text{CDCl}_3$ , ppm):  $\delta$  = 8.02 (d,  $J$  = 8.8 Hz, 2 H), 7.69 (d,  $J$  = 8.0 Hz, 2 H), 7.41-7.37 (m, 2 H), 7.27-7.24 (m, 1 H), 7.18 (d,  $J$  = 8.0 Hz, 2 H),

7.07 (d,  $J = 8.0$  Hz, 2 H), 6.94 (d,  $J = 8.0$  Hz, 2 H), 6.68 (s, 1 H), 3.83 (s, 3 H), 2.29 (s, 3 H);  $^{13}\text{C}$  NMR (100 MHz,  $\text{CDCl}_3$ , ppm):  $\delta = 159.54, 153.65, 152.09, 135.75, 133.31, 130.17, 129.89, 128.77, 127.69, 127.59, 127.51, 123.74, 123.11, 113.99, 112.58, 110.36, 55.33, 20.97$ ; HRMS calcd for  $\text{C}_{24}\text{H}_{20}\text{O}_2\text{S}$   $[\text{M}+\text{H}]^+$  373.1257; found: 373.1251.

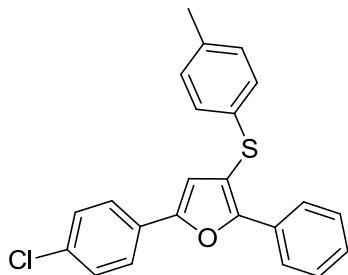

**5-(4-chlorophenyl)-2-phenyl-3-(p-tolylthio)furan (3kb)**

Colorless oil.  $^1\text{H}$  NMR (400 MHz,  $\text{CDCl}_3$ , ppm):  $\delta = 8.06$  (d,  $J = 7.2$  Hz, 2 H), 7.60 (d,  $J = 8.4$  Hz, 2 H), 7.43-7.39 (m, 2 H), 7.37-7.31 (m, 3 H), 7.21 (d,  $J = 8.4$  Hz, 2 H), 7.08 (d,  $J = 8.0$  Hz, 2 H), 6.63 (s, 1 H), 2.30 (s, 3 H);  $^{13}\text{C}$  NMR (100 MHz,  $\text{CDCl}_3$ , ppm):  $\delta = 152.98, 151.61, 136.27, 133.56, 132.60, 129.98, 129.02, 128.58, 128.38, 128.19, 125.91, 125.09, 124.92, 123.79, 113.13, 112.72, 21.03$ ; HRMS calcd for  $\text{C}_{23}\text{H}_{17}\text{ClOS}$   $[\text{M}+\text{H}]^+$  377.0762; found: 377.0768.

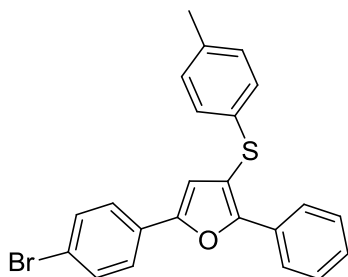

**5-(4-bromophenyl)-2-phenyl-3-(p-tolylthio)furan (3lb)**

Colorless oil.  $^1\text{H}$  NMR (400 MHz,  $\text{CDCl}_3$ , ppm):  $\delta = 8.07$ -8.04 (m, 2 H), 7.52-7.50 (m, 4 H), 7.43-7.36 (m, 2 H), 7.34-7.30 (m, 1 H), 7.21 (d,  $J = 8.4$  Hz, 2 H), 7.10-7.07 (m, 2 H), 6.65 (s, 1 H), 2.23 (s, 3 H);  $^{13}\text{C}$  NMR (100 MHz,  $\text{CDCl}_3$ , ppm):  $\delta = 153.02, 151.61, 136.28, 132.55, 131.93, 129.96, 129.79, 128.94, 128.56, 128.38, 128.19, 125.91, 125.33, 121.69, 113.17, 112.80, 21.00$ ; HRMS calcd for  $\text{C}_{23}\text{H}_{17}\text{BrOS}$   $[\text{M}+\text{H}]^+$  421.0256; found: 421.0250.

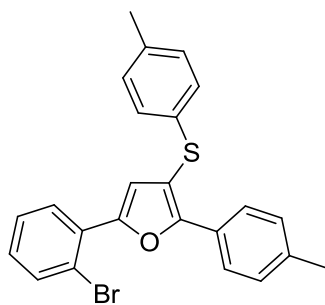

**5-(2-bromophenyl)-2-(p-tolyl)-3-(p-tolylthio)furan (3mb)**

Colorless oil.  $^1\text{H}$  NMR (400 MHz,  $\text{CDCl}_3$ , ppm):  $\delta$  = 7.98 (d,  $J$  = 8.0 Hz, 2 H), 7.89-7.87 (m, 1 H), 7.65-7.63 (m, 1 H), 7.40-7.36 (m, 1 H), 7.22-7.18 (m, 5 H), 7.15-7.11 (m, 1 H), 7.07 (d,  $J$  = 8.0 Hz, 2 H), 2.37 (s, 3 H), 2.29 (s, 3 H);  $^{13}\text{C}$  NMR (100 MHz,  $\text{CDCl}_3$ , ppm):  $\delta$  = 153.82, 149.70, 138.38, 135.78, 134.29, 133.15, 130.54, 129.89, 129.26, 128.71, 128.55, 127.63, 127.43, 127.23, 126.07, 119.67, 118.15, 111.13, 21.41, 20.97; HRMS calcd for  $\text{C}_{24}\text{H}_{19}\text{BrOS}$   $[\text{M}+\text{H}]^+$  435.0413; found: 435.0416.

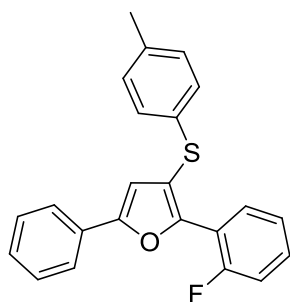

**2-(2-fluorophenyl)-5-phenyl-3-(p-tolylthio)furan (3nb)**

Colorless oil.  $^1\text{H}$  NMR (400 MHz,  $\text{CDCl}_3$ , ppm):  $\delta$  = 7.76-7.74 (m, 3 H), 7.72-7.68 (m, 4 H), 7.40-7.29 (m, 4 H), 7.23-7.7.07 (m, 2 H), 6.68 (s, 1 H), 2.30 (s, 3 H);  $^{13}\text{C}$  NMR (100 MHz,  $\text{CDCl}_3$ , ppm):  $\delta$  = 159.65 (d,  $J$  = 244 Hz, 1 C), 154.12, 149.17, 136.16, 132.92, 130.42 (d,  $J$  = 3 Hz, 1 C), 130.31, 130.01, 129.87, 128.77, 128.52, 128.03, 123.94 (d,  $J$  = 5 Hz, 1 C), 118.13 (d,  $J$  = 13 Hz, 1 C), 116.32 (d,  $J$  = 24 Hz, 2 C), 115.68, 111.04, 21.00; HRMS calcd for  $\text{C}_{23}\text{H}_{17}\text{FOS}$   $[\text{M}+\text{H}]^+$  361.1057; found: 361.1062.

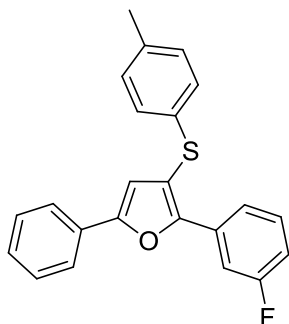

**2-(3-fluorophenyl)-5-phenyl-3-(p-tolylthio)furan (3ob)**

White solid. melting point: 93-95 °C.  $^1\text{H}$  NMR (400 MHz,  $\text{CDCl}_3$ , ppm):  $\delta$  = 7.92-7.88 (m, 1 H), 7.83-7.79 (m, 1 H), 7.71-7.68 (m, 2 H), 7.42-7.38 (m, 3 H), 7.36-7.34 (m, 1 H), 7.32-7.28 (m, 2 H), 7.23 (d,  $J$  = 8.0 Hz, 2 H), 7.10-7.08 (m, 1 H), 7.02-6.97 (m, 1 H), 6.65 (s, 1 H), 2.31 (s, 3 H);  $^{13}\text{C}$  NMR (100 MHz,  $\text{CDCl}_3$ , ppm):  $\delta$  = 162.88 (d,  $J$  = 244 Hz, 1 C), 153.06, 150.99, 136.46, 132.18, 130.09 (d,  $J$  = 9 Hz, 2 C), 130.00, 129.78, 128.82, 128.60, 128.15, 123.99, 121.37 (d,  $J$  = 3 Hz, 1 C), 114.71 (d,  $J$  = 22 Hz, 1 C), 114.46, 112.41 (d,  $J$  = 24 Hz, 1 C), 112.29, 21.00; HRMS calcd for  $\text{C}_{23}\text{H}_{17}\text{FOS}$   $[\text{M}+\text{H}]^+$  361.1057; found: 361.1050.

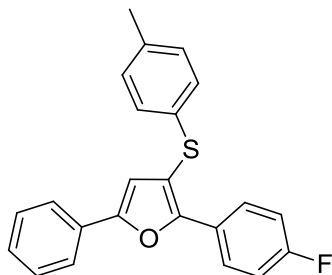

**2-(4-fluorophenyl)-5-phenyl-3-(p-tolylthio)furan (3pb)**

Colorless oil.  $^1\text{H}$  NMR (400 MHz,  $\text{CDCl}_3$ , ppm):  $\delta$  = 8.08-8.04 (m, 2 H), 7.71-7.68 (m, 2 H), 7.42-7.38 (m, 2 H), 7.31-7.28 (m, 1 H), 7.19 (d,  $J$  = 8.0 Hz, 2 H), 7.12-7.07 (m, 4 H), 6.68 (s, 1 H), 2.30 (s, 3 H);  $^{13}\text{C}$  NMR (100 MHz,  $\text{CDCl}_3$ , ppm):  $\delta$  = 162.39 (d,  $J$  = 248 Hz, 1 C), 152.64, 152.19, 136.08, 132.66, 129.90 (d,  $J$  = 5 Hz, 1 C), 128.77, 127.91, 127.83 (d,  $J$  = 10 Hz, 2 C), 127.81, 126.49, 126.46, 123.82, 115.55 (d,  $J$  = 21 Hz, 2 C), 112.39, 112.14, 20.94; HRMS calcd for  $\text{C}_{23}\text{H}_{17}\text{FOS}$   $[\text{M}+\text{H}]^+$  361.1057; found: 361.1063.

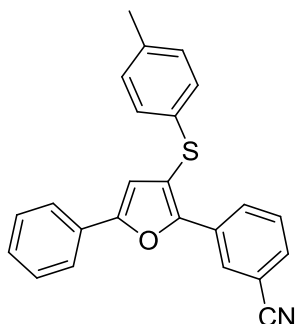

**3-(5-phenyl-3-(p-tolylthio)furan-2-yl)benzonitrile (3qb)**

White solid. melting point: 75-77 °C.  $^1\text{H}$  NMR (400 MHz,  $\text{CDCl}_3$ , ppm):  $\delta$  = 8.35 (s, 1 H), 8.31 (d,  $J$  = 8.0 Hz, 1 H), 7.70-7.54 (m, 2 H), 7.52-7.48 (m, 2 H), 7.43-7.39 (m, 2 H), 7.33-7.30 (m, 1 H), 7.25-7.21 (m, 3 H), 7.10 (d,  $J$  = 8.0 Hz, 2 H), 6.65 (s, 1 H), 2.31 (s, 3 H);  $^{13}\text{C}$  NMR (100 MHz,  $\text{CDCl}_3$ , ppm):  $\delta$  = 153.73, 149.43, 136.86, 131.53, 131.40, 130.74, 130.12, 129.49, 129.44, 129.38, 128.95, 128.89, 128.45, 124.09, 118.72, 115.96, 112.89, 112.22, 21.02; HRMS calcd for  $\text{C}_{24}\text{H}_{17}\text{NOS}$   $[\text{M}+\text{H}]^+$  368.1204; found: 368.1209.

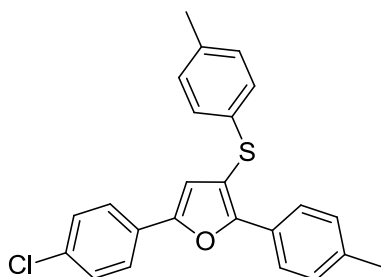

**5-(4-chlorophenyl)-2-(p-tolyl)-3-(p-tolylthio)furan (3rb)**

Colorless oil.  $^1\text{H}$  NMR (400 MHz,  $\text{CDCl}_3$ , ppm):  $\delta$  = 7.95 (d,  $J$  = 8.0 Hz, 2 H), 7.62-7.59 (m, 2 H), 7.36-7.34 (m, 2 H), 7.23-7.20 (m, 4 H), 7.18-7.08 (m, 2 H), 6.64 (s, 1 H), 2.37 (s, 3 H), 2.29 (s, 3 H);  $^{13}\text{C}$  NMR (100 MHz,  $\text{CDCl}_3$ , ppm):  $\delta$  = 153.63, 151.35, 138.35, 136.15, 133.48, 132.93, 130.06, 129.95, 129.39, 129.28, 129.01, 128.68, 128.12, 127.35, 125.96, 125.07, 112.87, 112.13, 21.51, 21.06; HRMS calcd for  $\text{C}_{24}\text{H}_{19}\text{ClOS}$   $[\text{M}+\text{H}]^+$  391.0918; found: 391.0923.

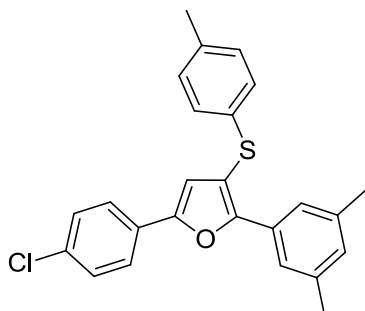

**5-(4-chlorophenyl)-2-(3,5-dimethylphenyl)-3-(p-tolylthio)furan (3sb)**

White solid. melting point: 112-113 °C.  $^1\text{H}$  NMR (400 MHz,  $\text{CDCl}_3$ , ppm):  $\delta$  = 7.67 (s, 2 H), 7.65 (d,  $J$  = 8.8 Hz, 2 H), 7.39 (d,  $J$  = 8.4 Hz, 2 H), 7.27 (d,  $J$  = 6.4 Hz, 2 H), 7.12 (d,  $J$  = 8.0 Hz, 2 H), 7.00 (s, 1 H), 6.65 (s, 1 H), 2.39 (s, 3 H), 2.34 (s, 3 H);  $^{13}\text{C}$  NMR (100 MHz,  $\text{CDCl}_3$ , ppm):  $\delta$  = 153.11, 151.35, 138.03, 136.27, 133.42, 132.72, 129.97, 129.90, 129.88, 128.96, 128.68, 128.62, 125.07, 123.75, 113.14, 112.53, 21.48, 21.00; HRMS calcd for  $\text{C}_{25}\text{H}_{21}\text{ClOS}$   $[\text{M}+\text{H}]^+$  405.1076; found: 405.1069.

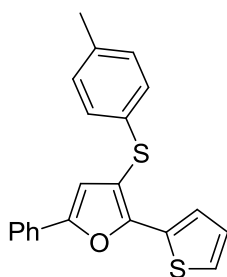

**5-phenyl-2-(thiophen-2-yl)-3-(p-tolylthio)furan (3tb)**

Colorless oil.  $^1\text{H}$  NMR (400 MHz,  $\text{CDCl}_3$ , ppm):  $\delta$  = 7.71-7.66 (m, 3 H), 7.42-7.38 (m, 3 H), 7.31-7.29 (m, 2 H), 7.20 (d,  $J$  = 8.0 Hz, 2 H), 7.07 (d,  $J$  = 7.6 Hz, 2 H), 6.70 (s, 1 H), 2.30 (s, 3 H);  $^{13}\text{C}$  NMR (100 MHz,  $\text{CDCl}_3$ , ppm):  $\delta$  = 152.50, 150.44, 136.06, 132.58, 131.81, 131.33, 129.89, 128.79, 127.97, 127.33, 126.84, 125.93, 125.02, 123.84, 112.11, 111.47, 20.97; HRMS calcd for  $\text{C}_{21}\text{H}_{16}\text{OS}_2$   $[\text{M}+\text{H}]^+$  349.0716; found: 349.0711.

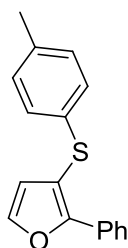

**2-phenyl-3-(p-tolylthio)furan (3ub)**

Colorless oil.  $^1\text{H}$  NMR (400 MHz,  $\text{CDCl}_3$ , ppm):  $\delta$  = 7.99 (d,  $J$  = 7.6 Hz, 2 H), 7.47 (d,  $J$  = 1.6 Hz, 1 H), 7.41-7.37 (m, 2 H), 7.31-7.27 (m, 1 H), 7.15 (d,  $J$  = 8.0 Hz, 2 H), 7.07 (d,  $J$  = 8.4 Hz, 2 H), 6.42 (d,  $J$  = 2.0 Hz, 1H), 2.29 (s, 3 H);  $^{13}\text{C}$  NMR (100 MHz,  $\text{CDCl}_3$ , ppm):  $\delta$  = 153.76, 141.68, 135.91, 133.07, 130.21, 129.85, 128.47, 128.05, 127.93, 125.95, 117.29, 110.39, 20.96; HRMS calcd for  $\text{C}_{17}\text{H}_{14}\text{OS}$   $[\text{M}+\text{H}]^+$  267.0838; found: 267.0842.

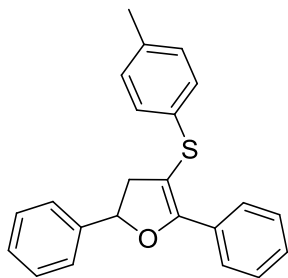

**2,5-diphenyl-4-(p-tolylthio)-2,3-dihydrofuran (4ab)**

Colorless oil.  $^1\text{H}$  NMR (400 MHz,  $\text{CDCl}_3$ , ppm):  $\delta$  = 8.04-8.01 (m, 2 H), 7.41-7.32 (m, 7 H), 7.31-7.28 (m, 1 H), 7.18 (d,  $J$  = 8.4 Hz, 2 H), 7.06 (d,  $J$  = 8.0 Hz, 2 H), 5.71-5.66 (m, 1 H), 3.38-3.31 (m, 1 H), 2.91-2.85 (m, 1 H), 2.29 (s, 3 H);  $^{13}\text{C}$  NMR (100 MHz,  $\text{CDCl}_3$ , ppm):  $\delta$  = 157.19, 142.33, 135.78, 132.25, 130.18, 129.83, 129.27, 128.64, 128.10, 127.88, 127.78, 127.62, 125.58, 98.48, 80.92, 44.15, 20.96; HRMS calcd for  $\text{C}_{23}\text{H}_{20}\text{OS}$   $[\text{M}+\text{H}]^+$  345.1307; found: 345.1303.

**Reference:**

- [1] P. Gao, Y. -W. Shen, R. Fang, X.-H. Hao, Z.-H. Qiu, F. Yang, X.-B. Yan, Q. Wang, X.-J. Gong, X.-Y. Liu and Y. -M. Liang, *Angew. Chem., Int. Ed.* **2014**, *53*, 7629.
- [2] D.-Q. Chen, P. Gao, P.-X. Zhou, X.-R. Song, Y.-F. Qiu, X.-Y. Liu and Y.-M. Liang, *Chem. Commun.* **2015**, *51*, 6637.
- [3]. Y.-Z. Chen, L.-Z. Wu, M.-L. Peng, D. Zhang, L.-P. Zhang and C.-H. Tung, *Tetrahedron*. **2006**, *62*, 10688.
- [4]. A. Arrault, F. Touzeau, G. Guillaumet, J.-Y. M érou, *Synthesis*. **1999**, *7*, 1241.

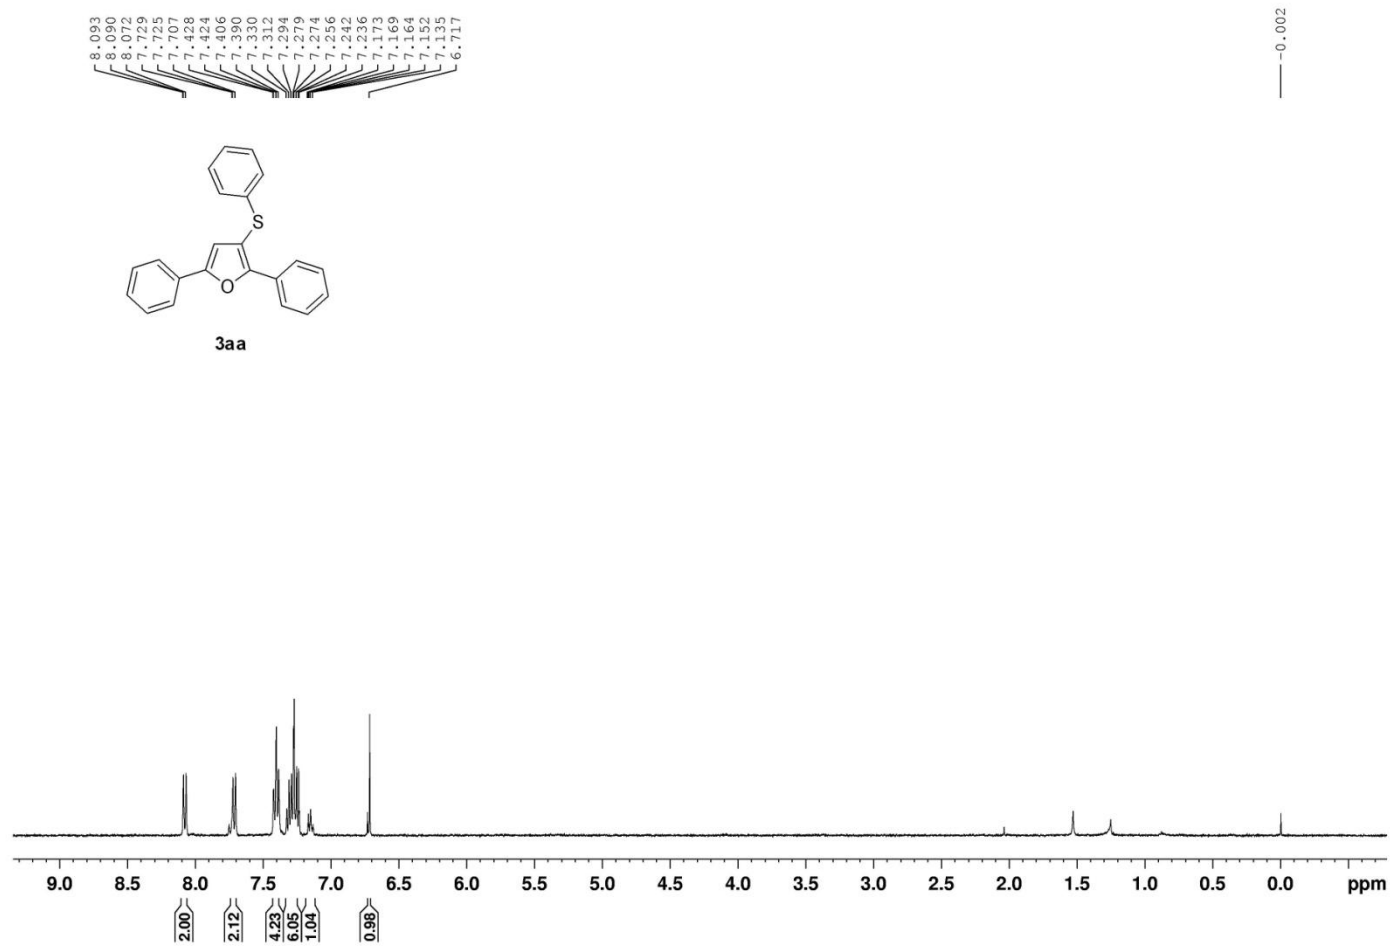

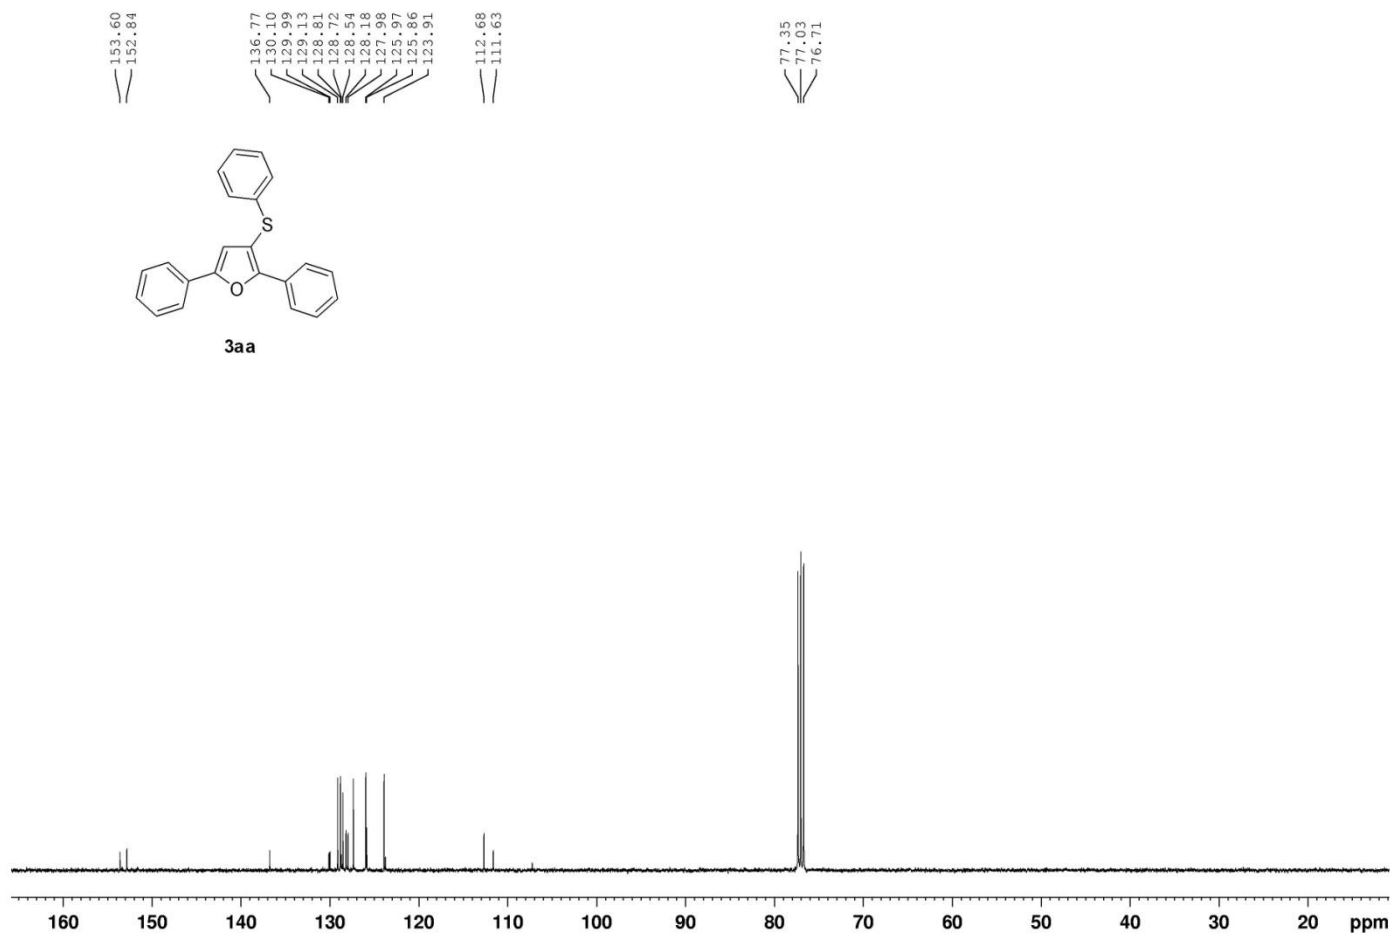

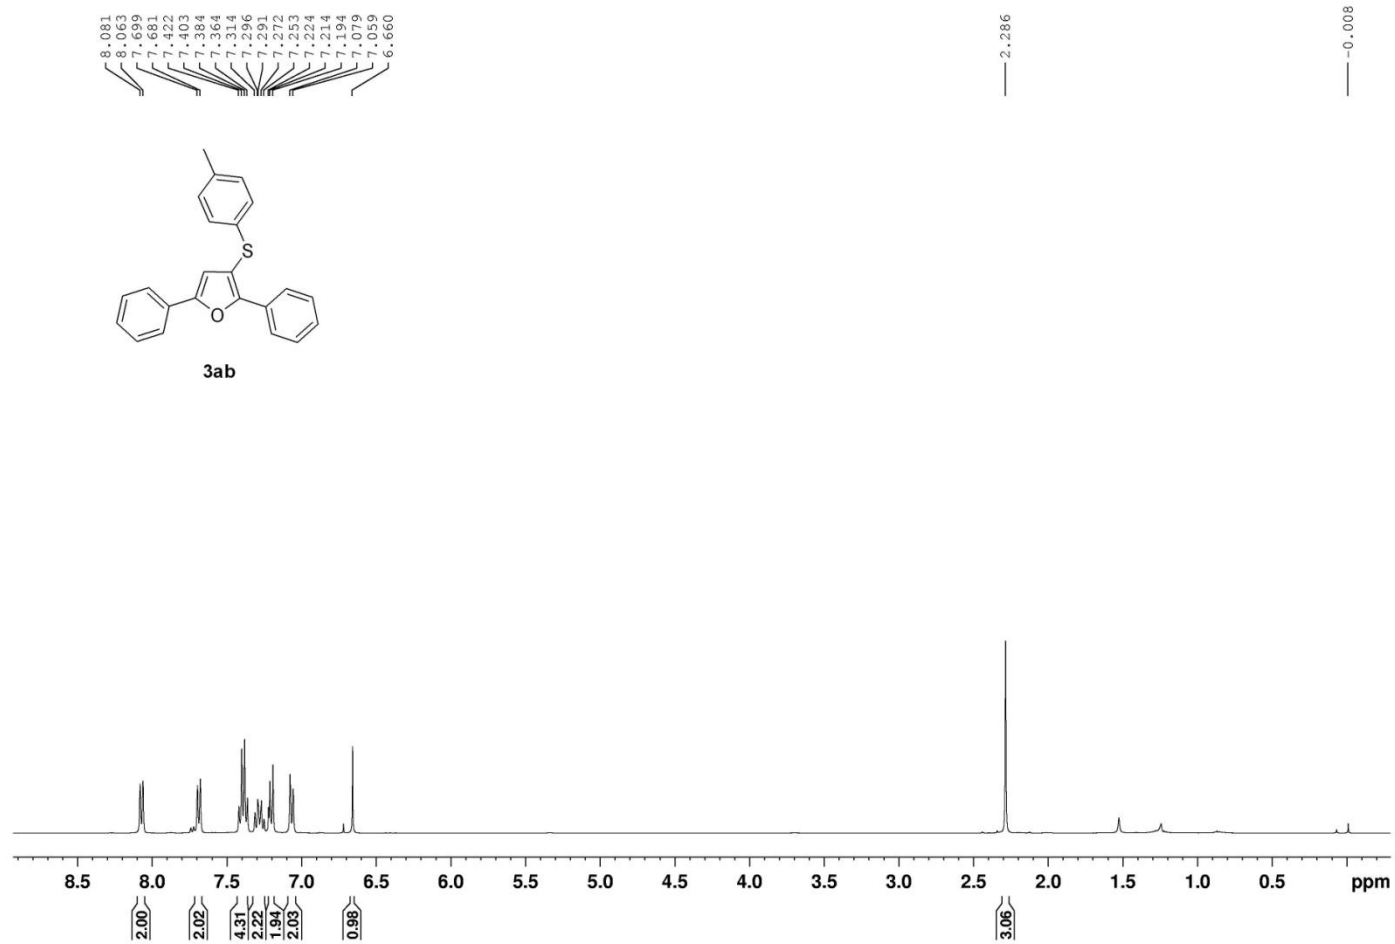

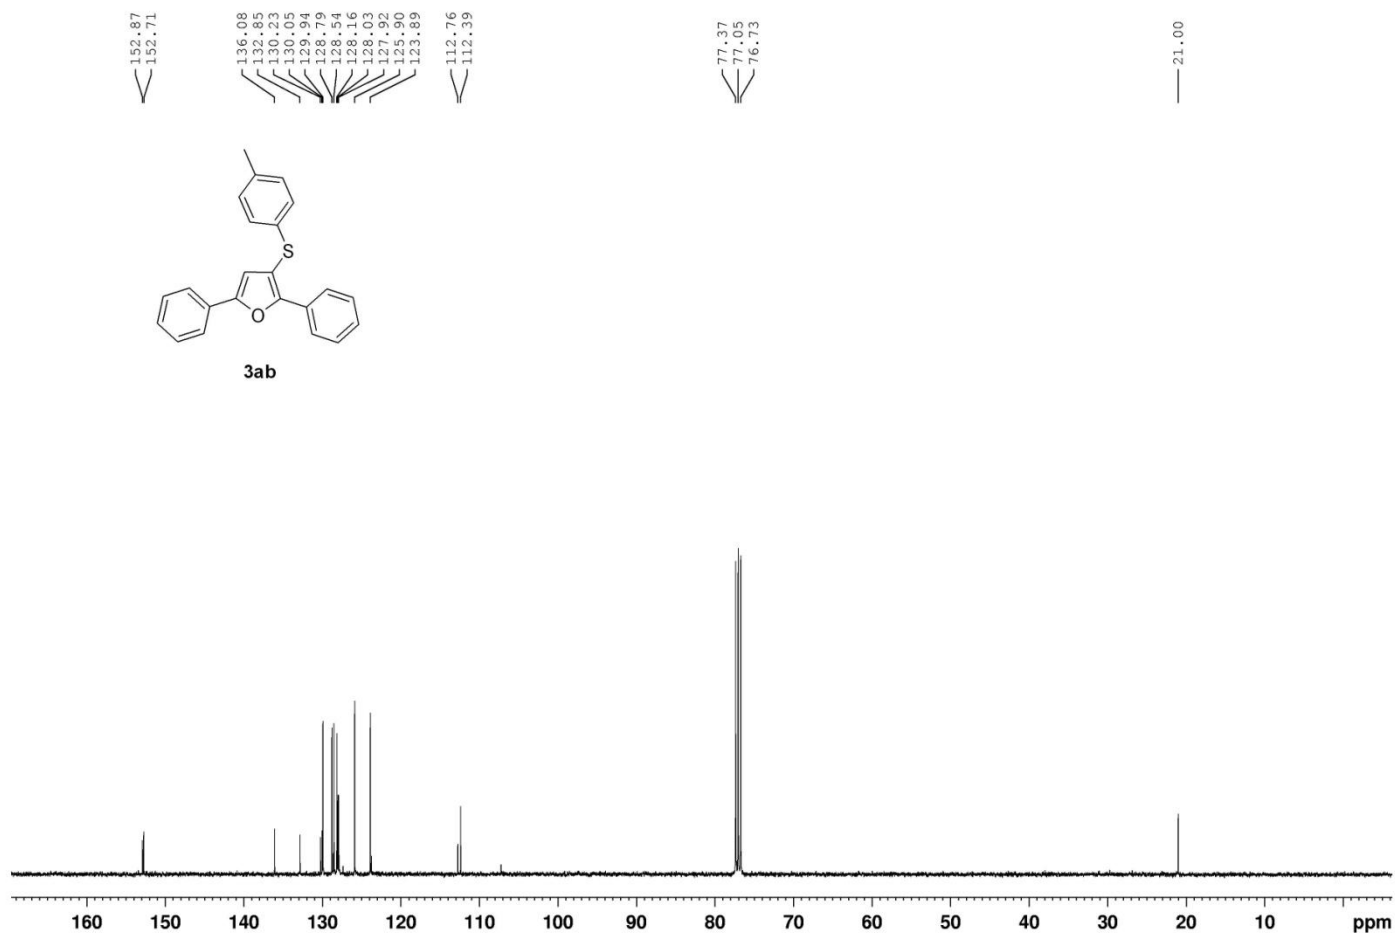

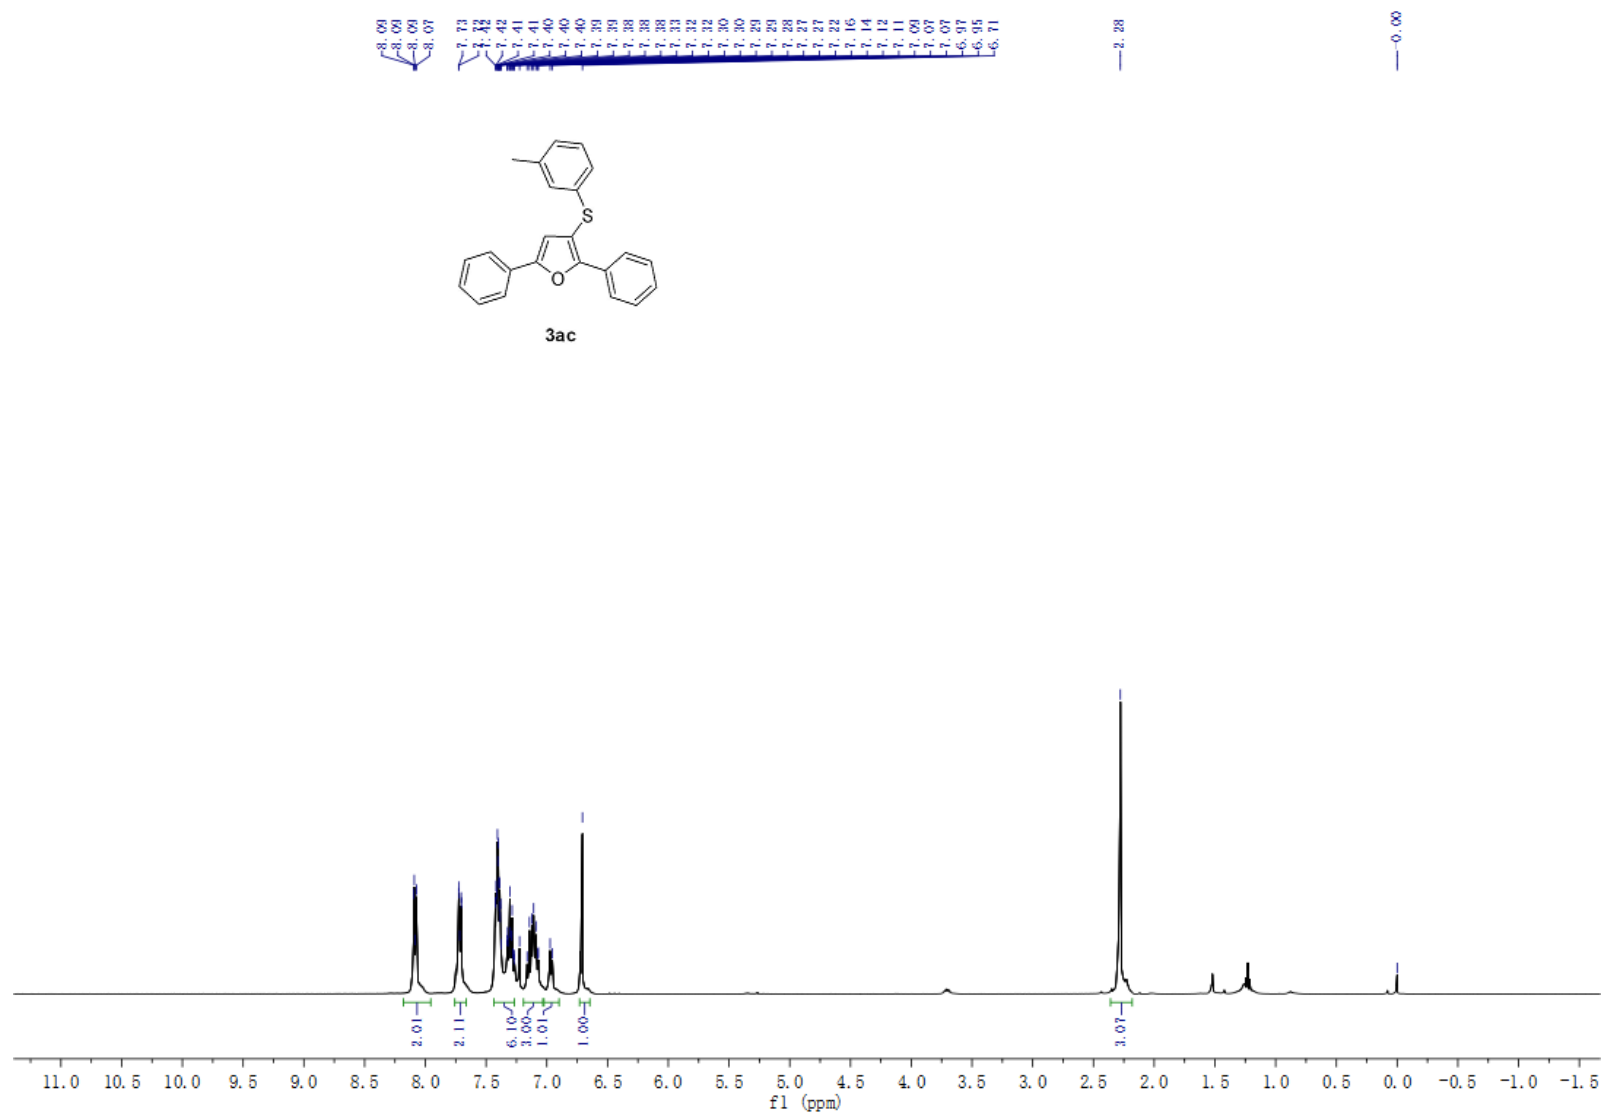

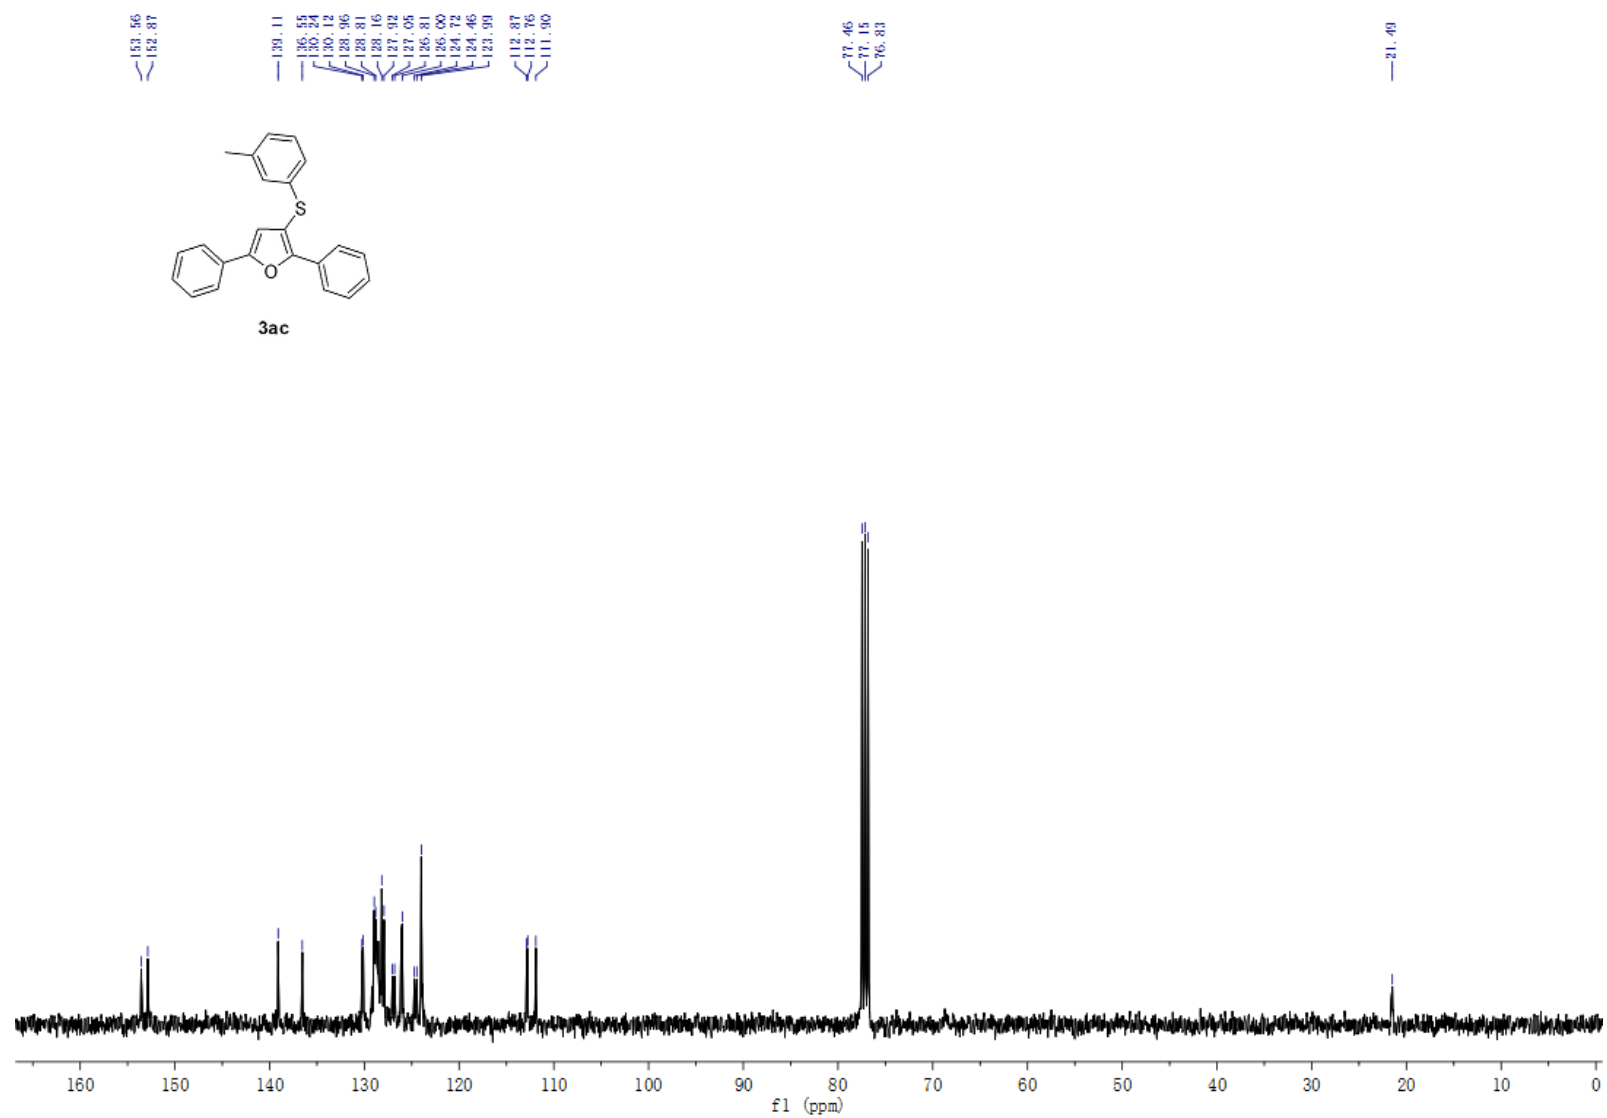

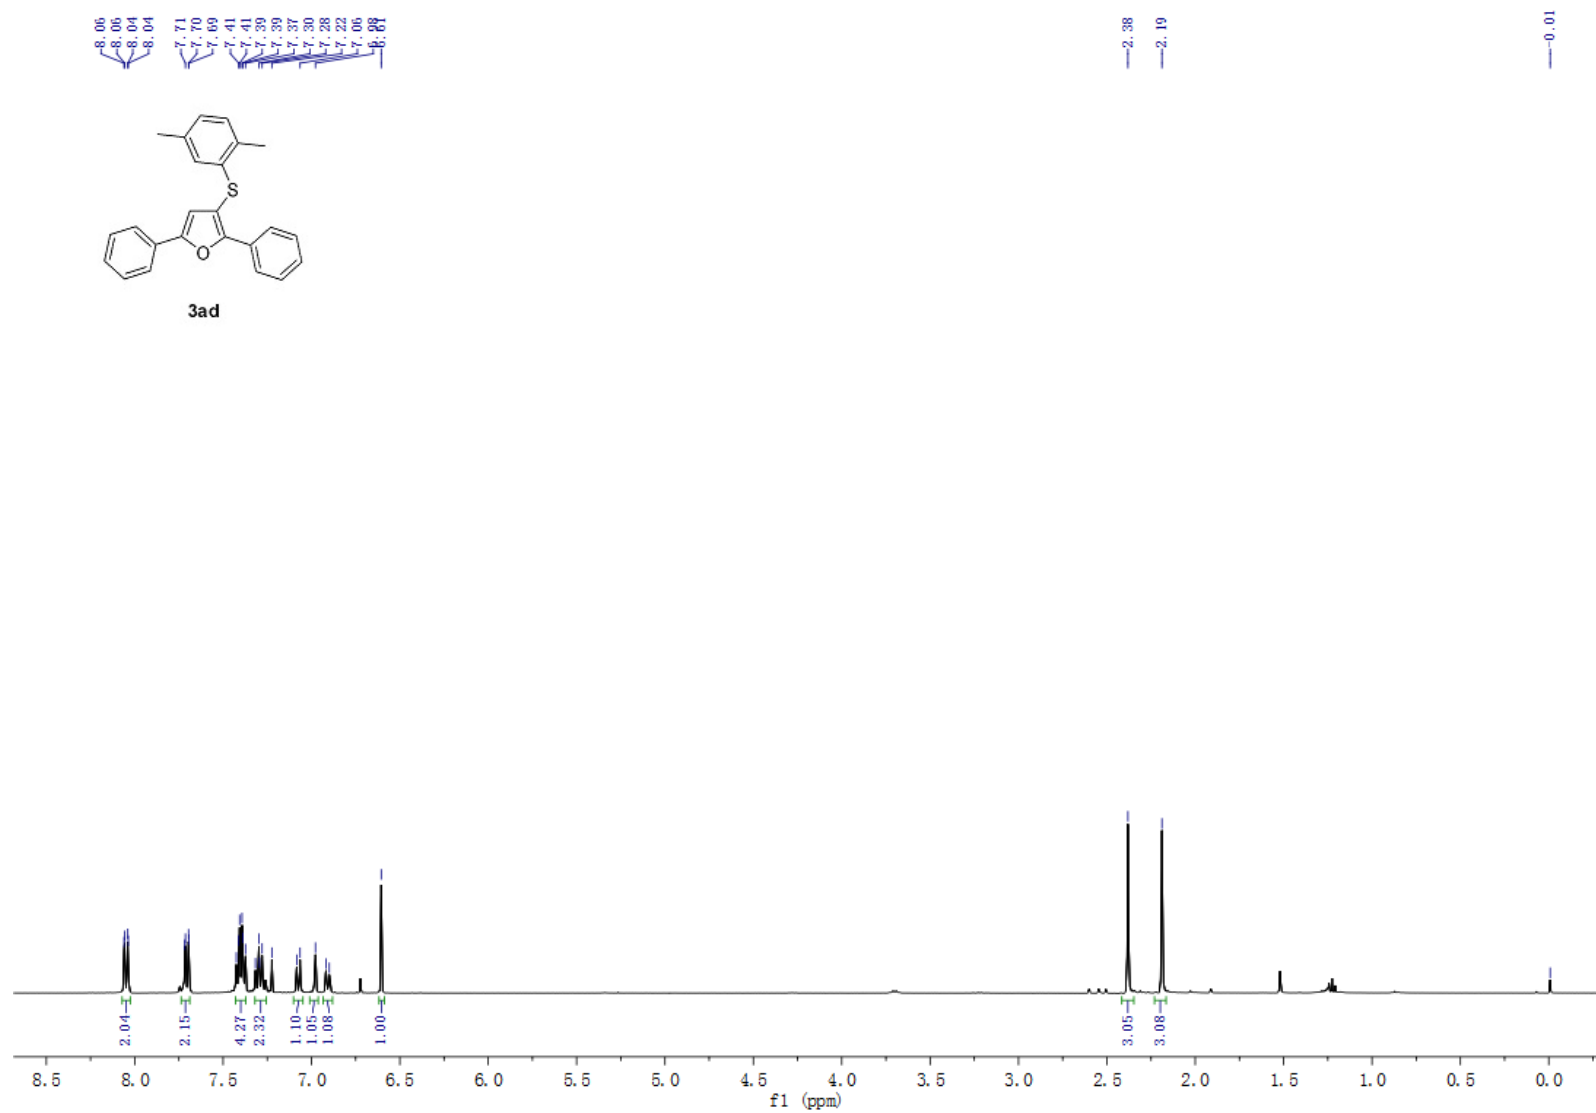

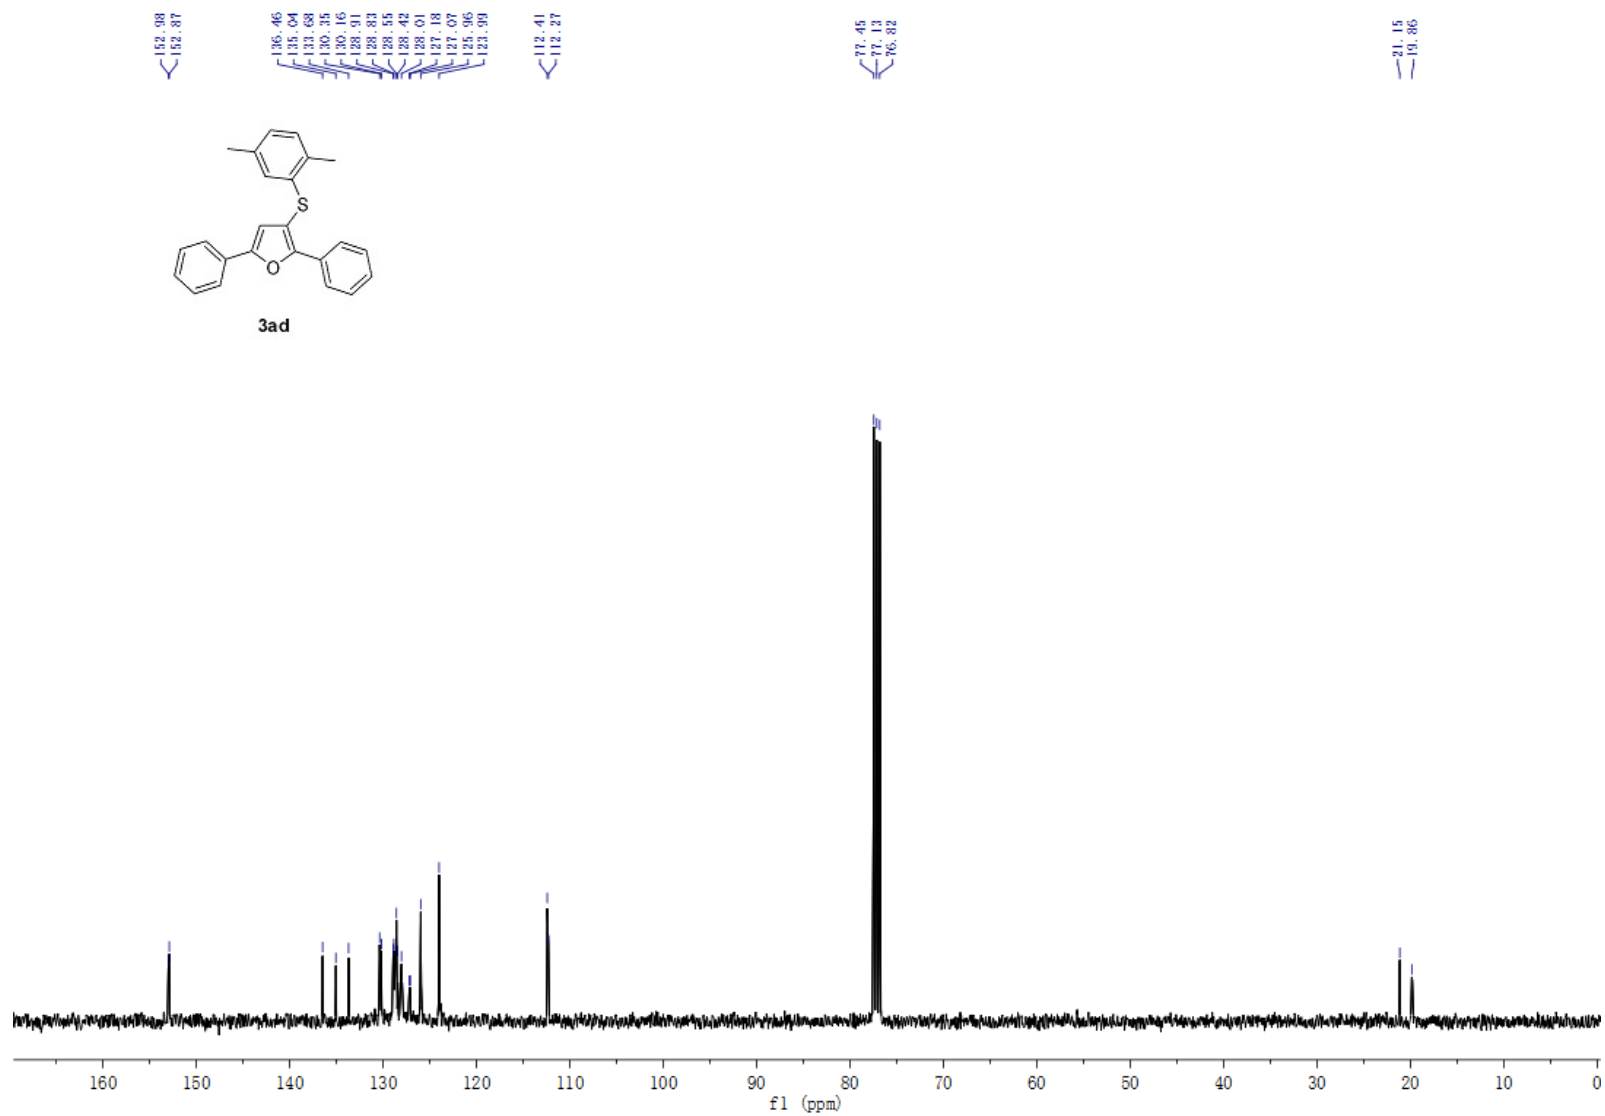

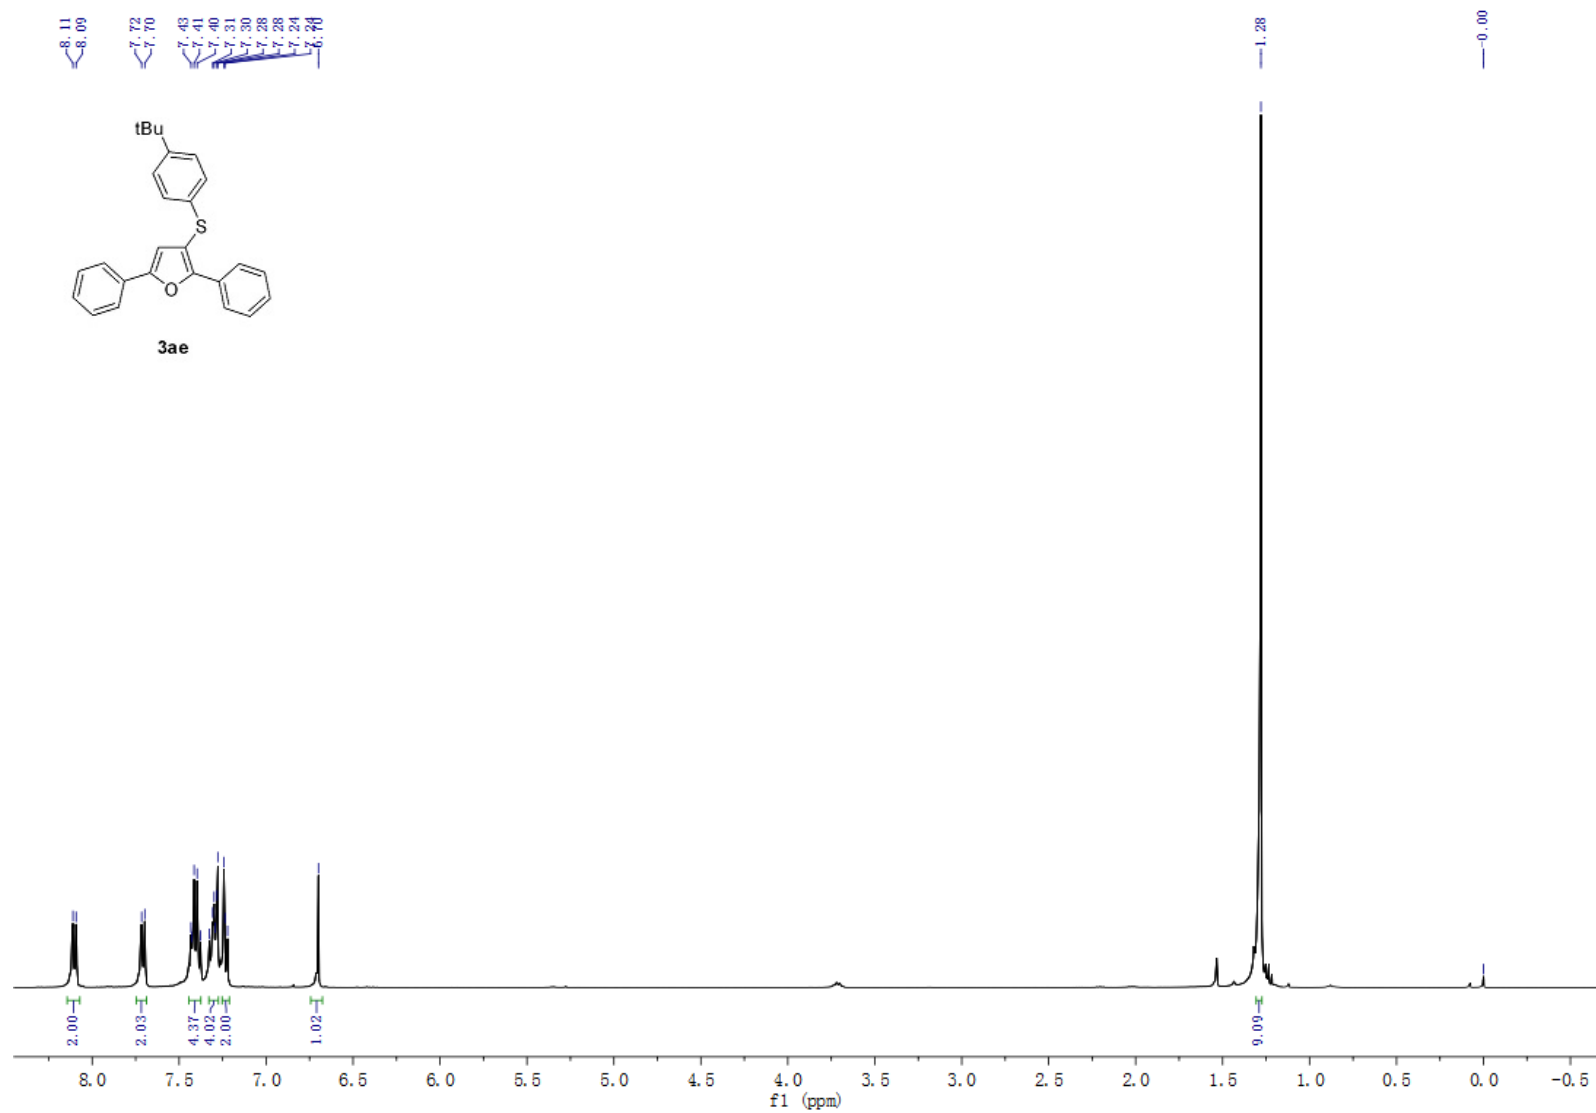

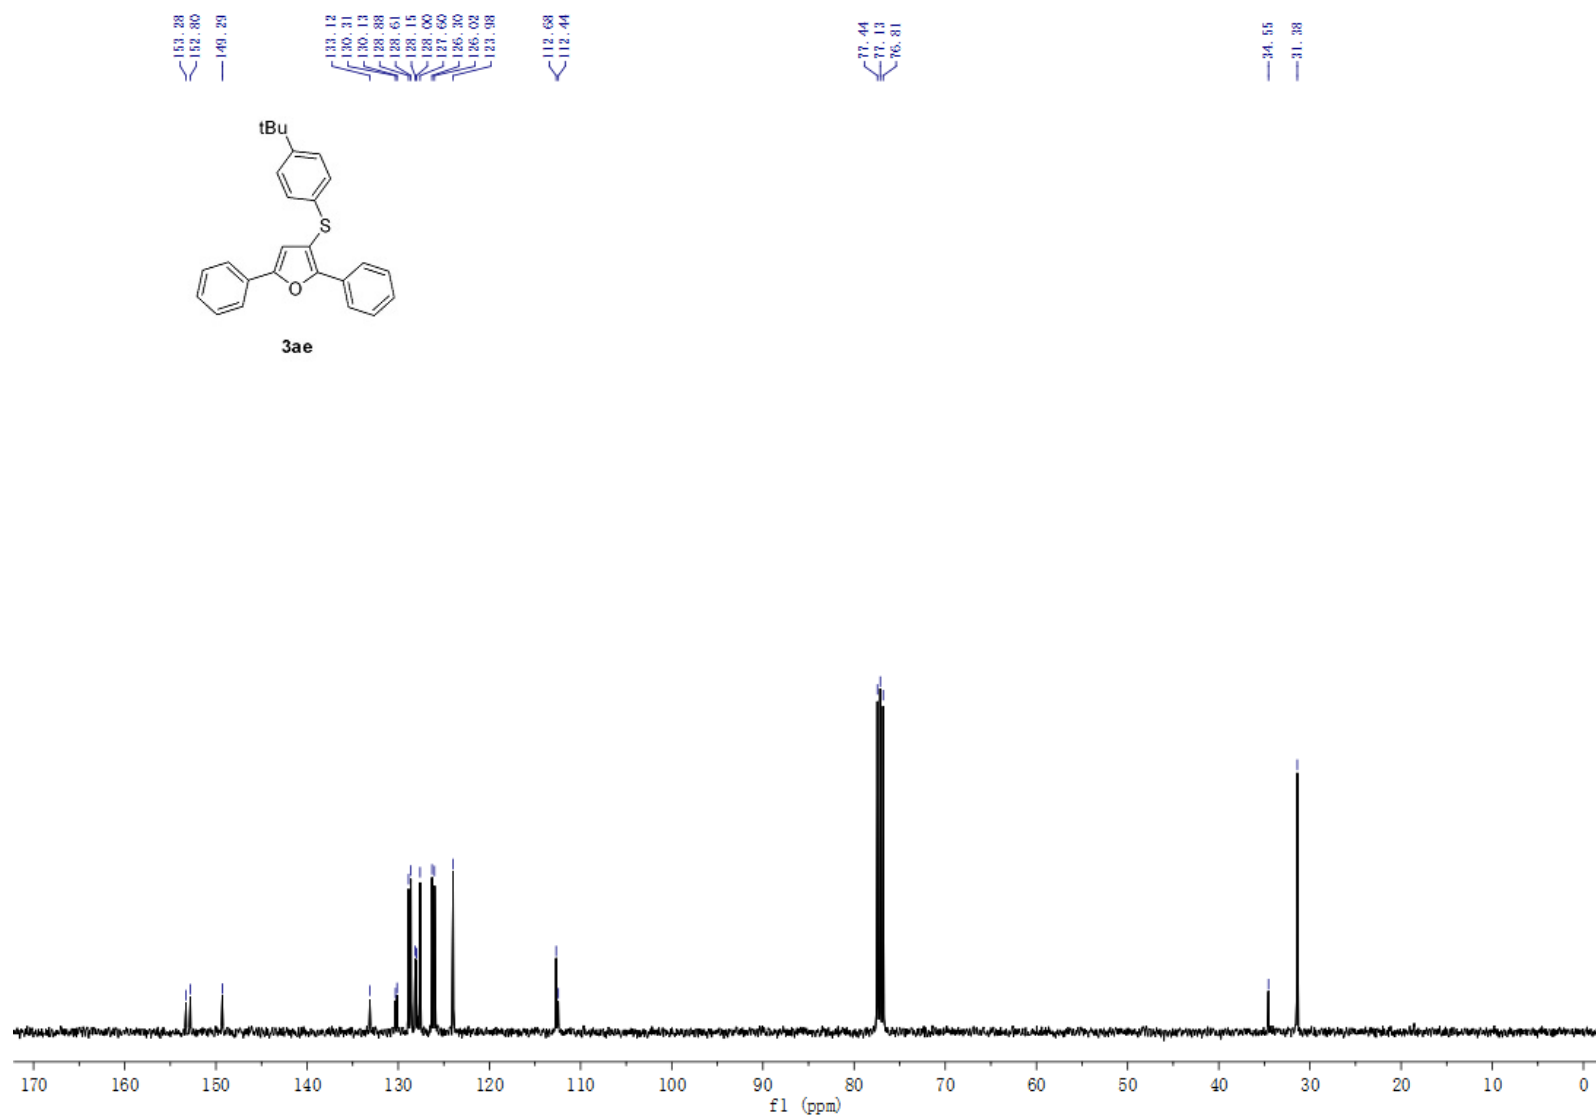

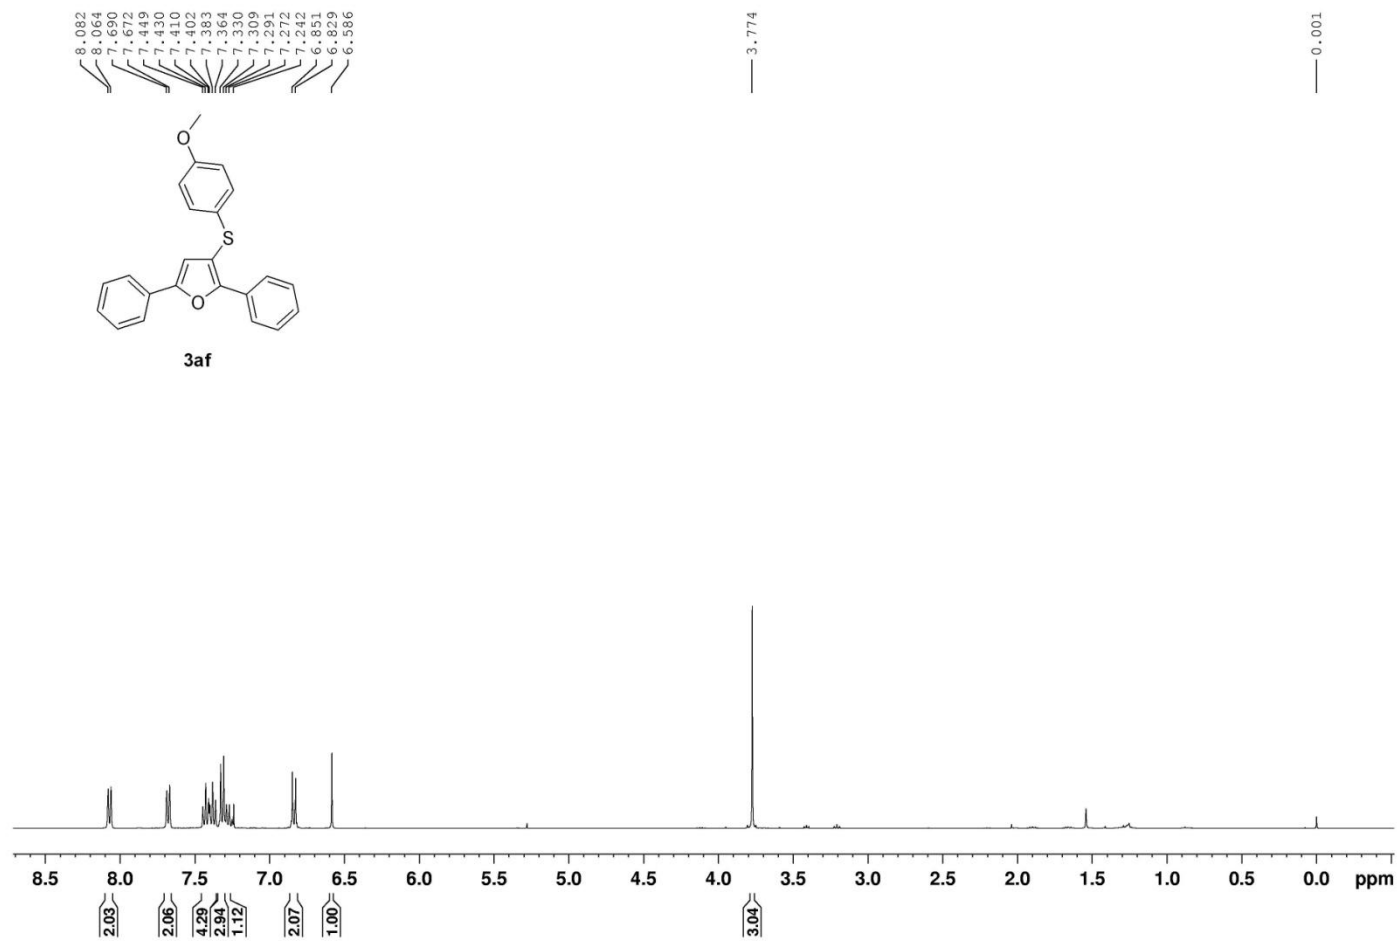

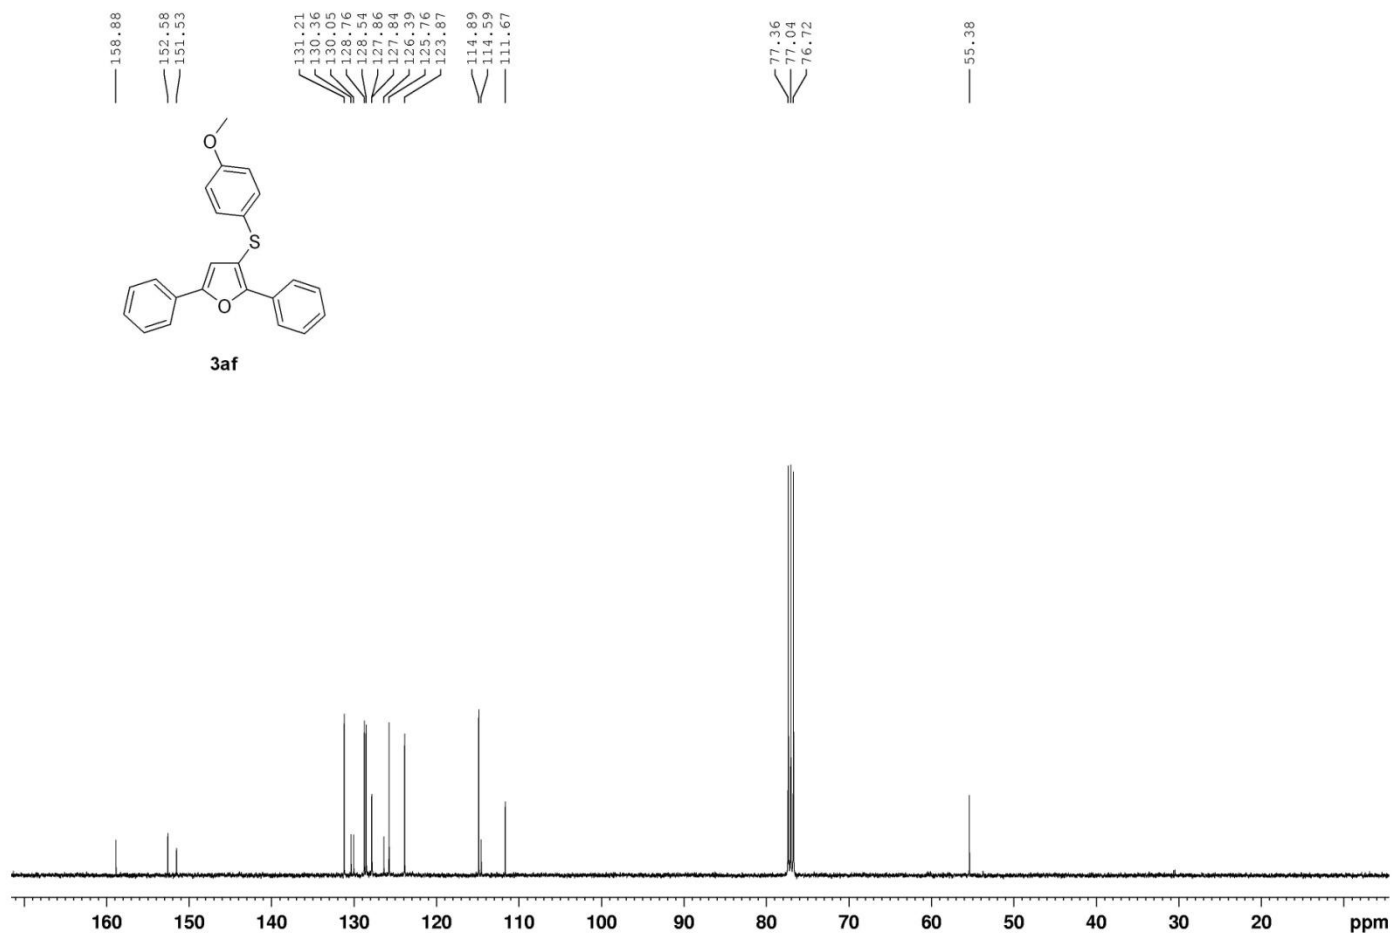

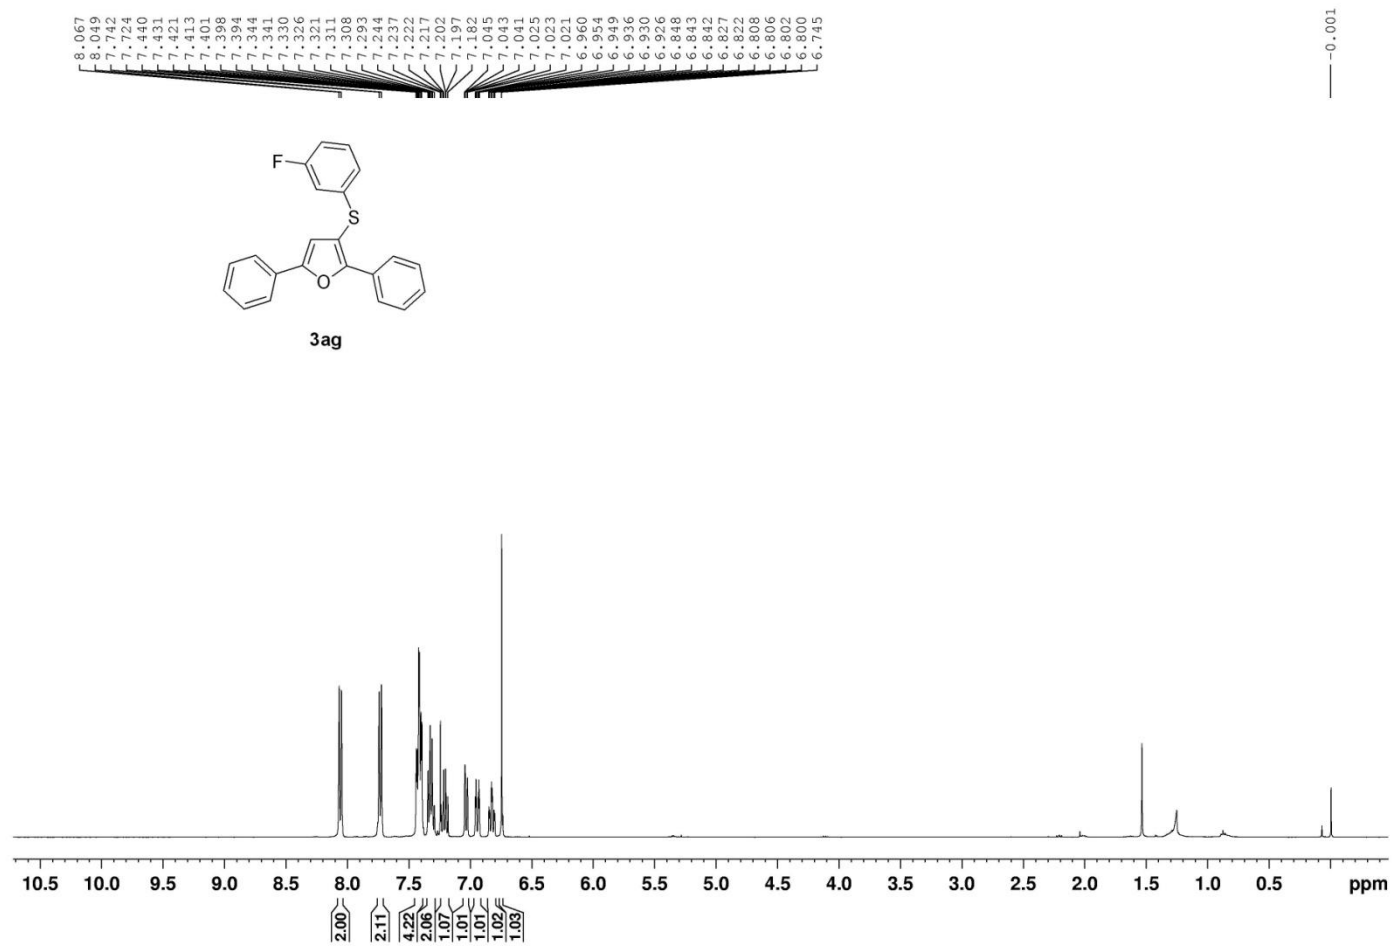

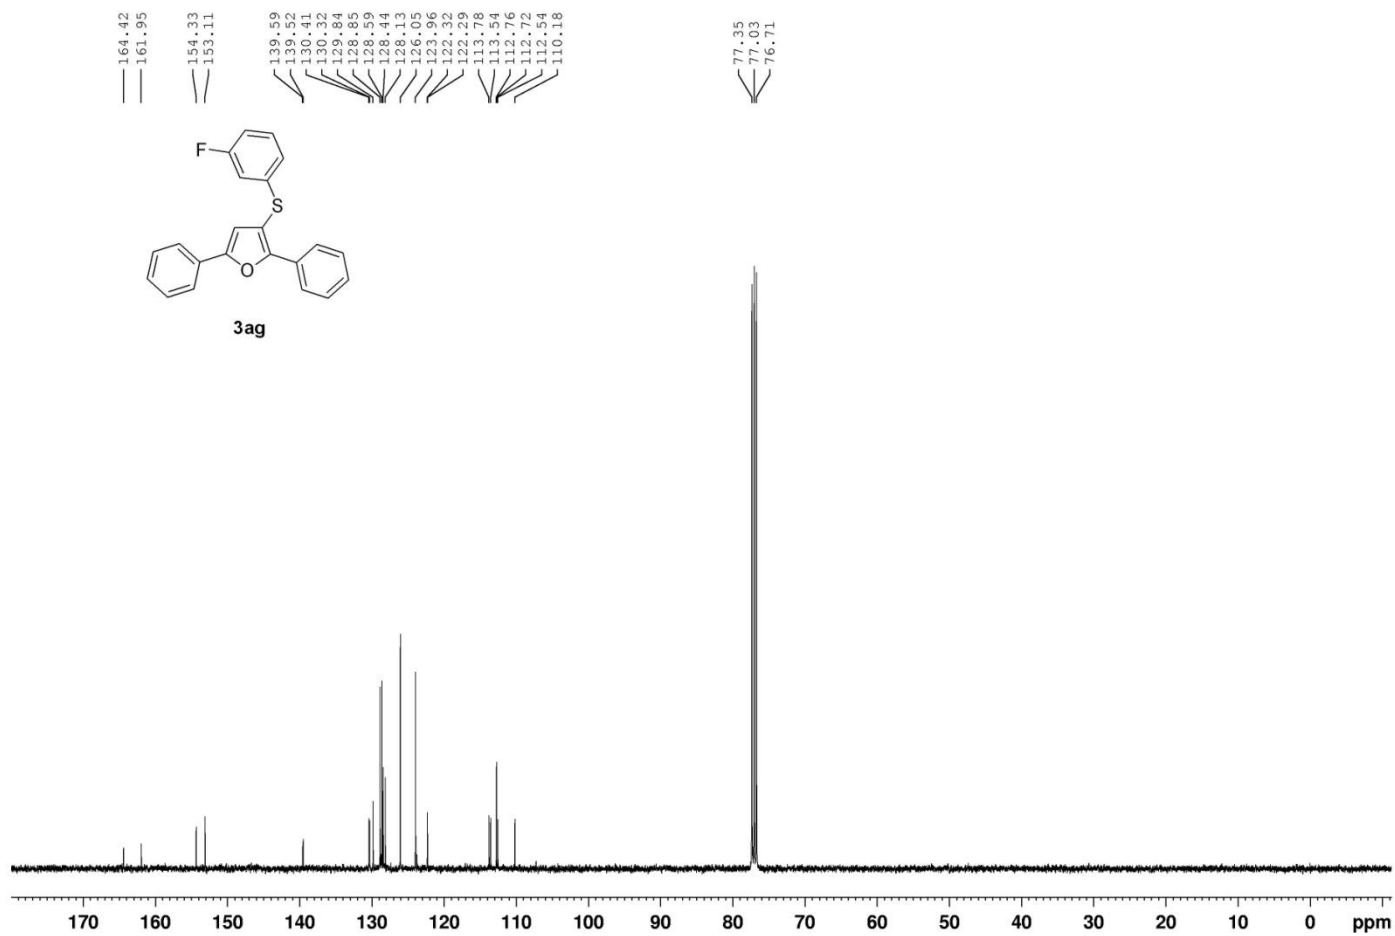

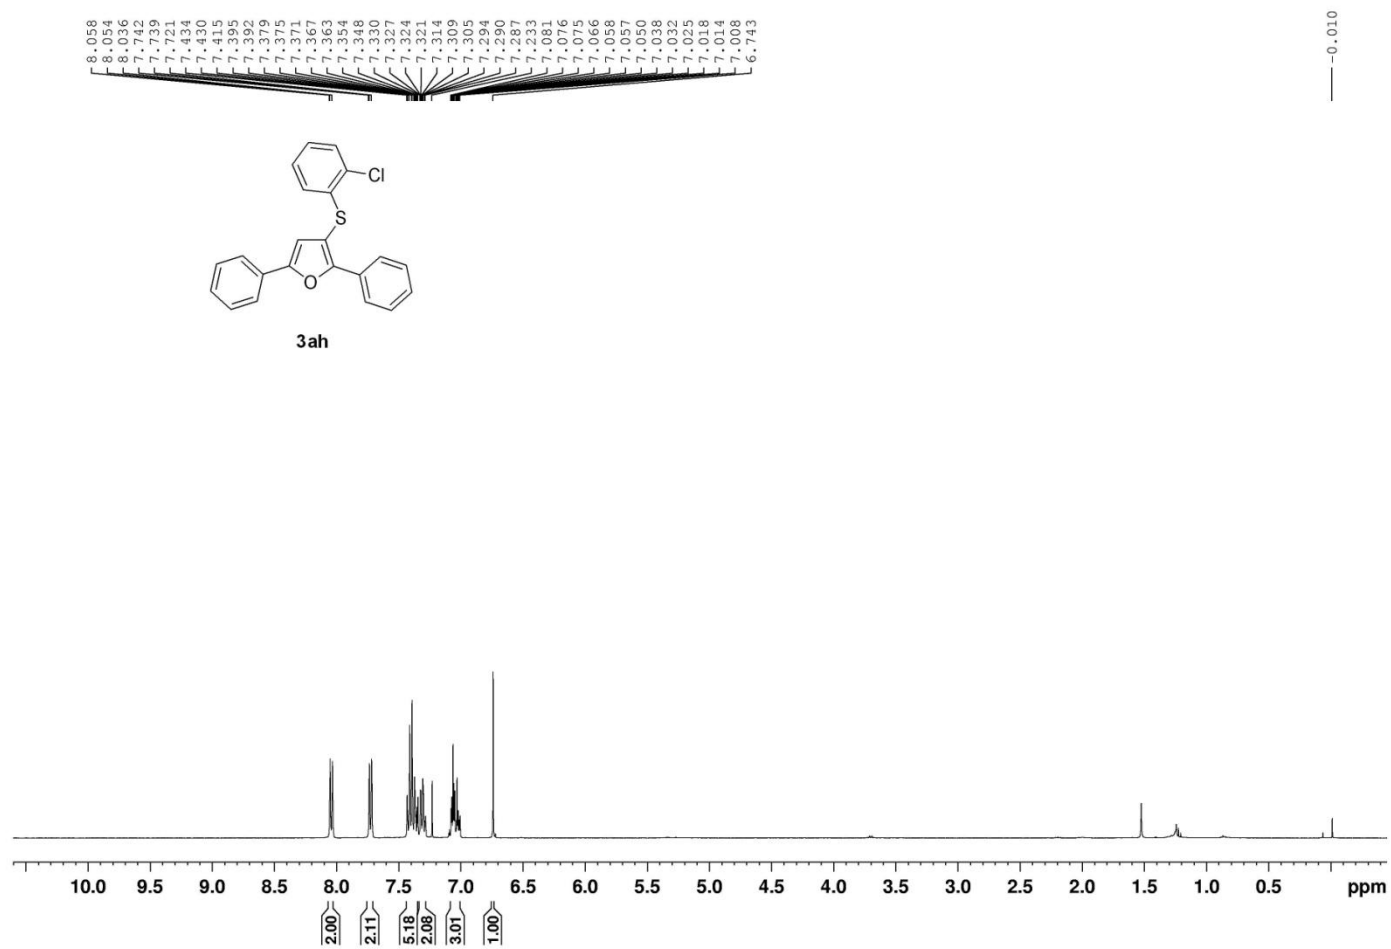

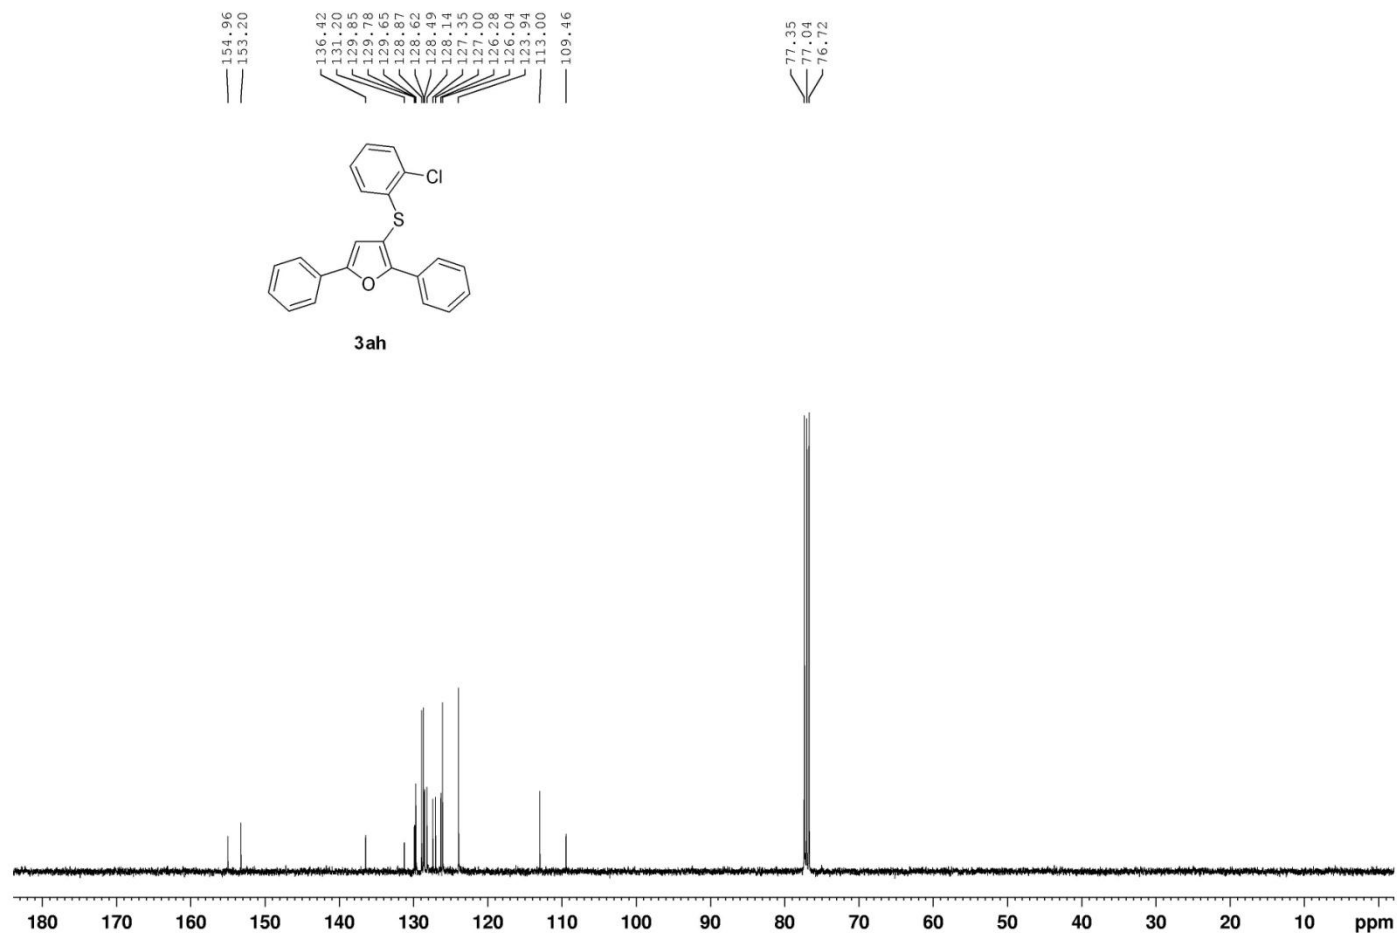

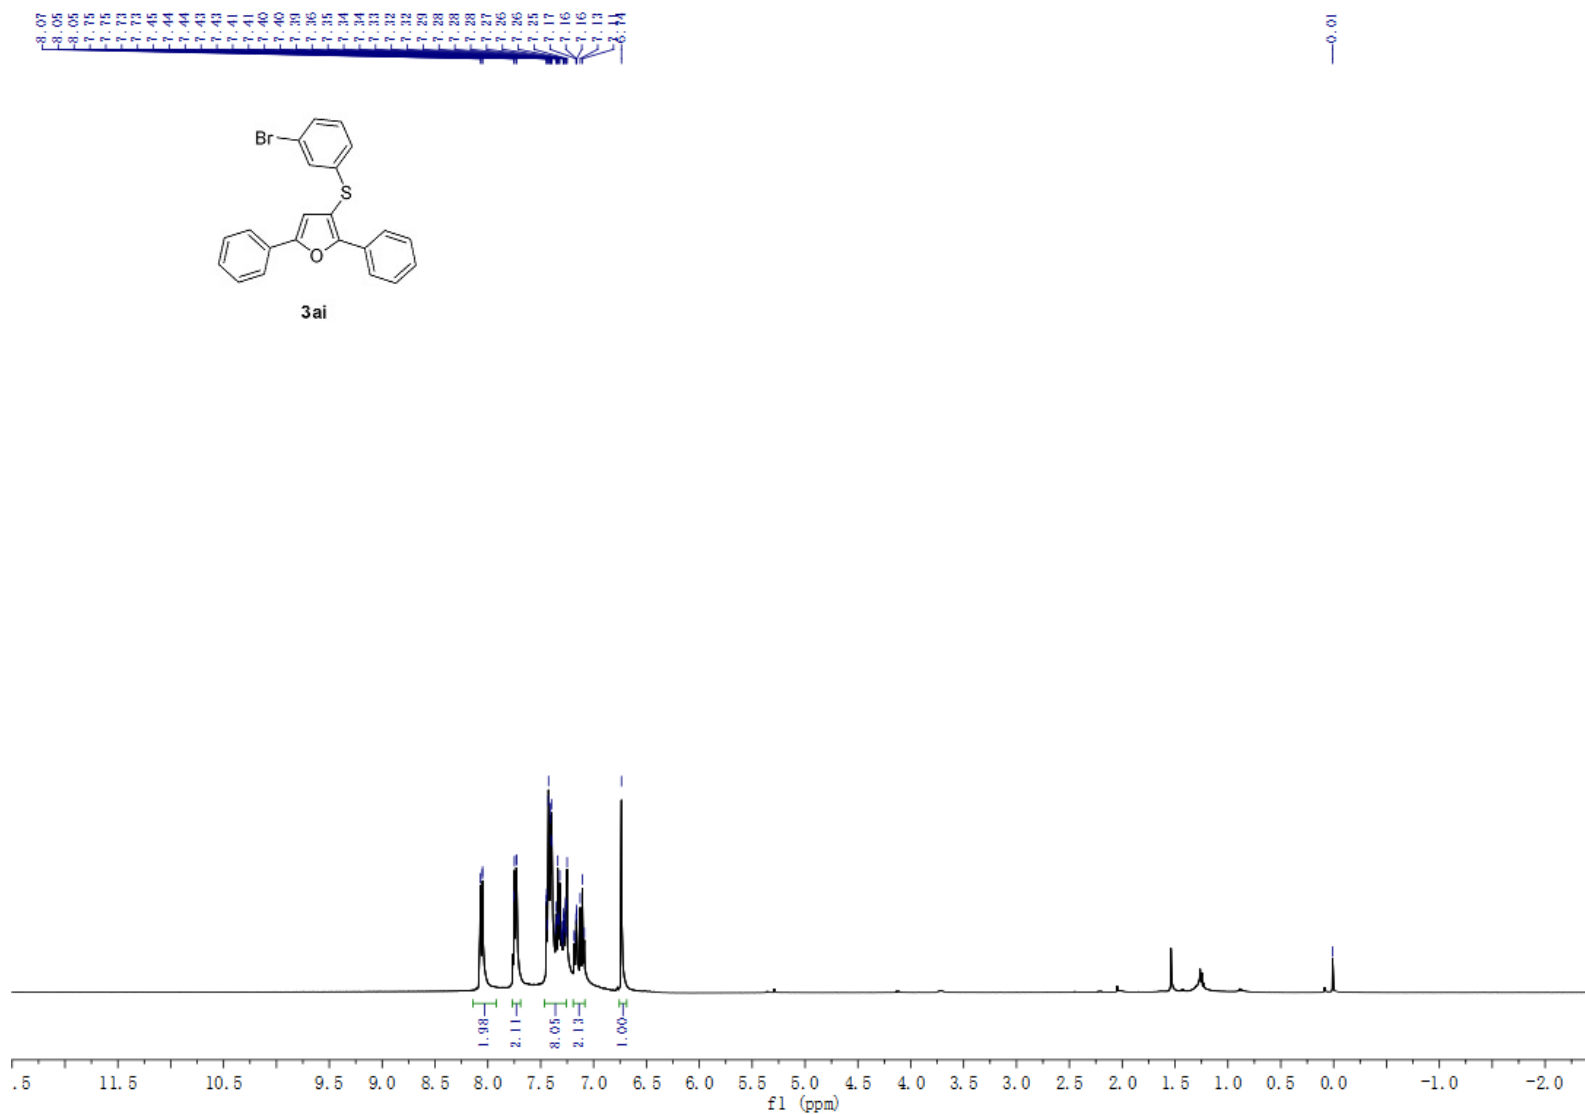

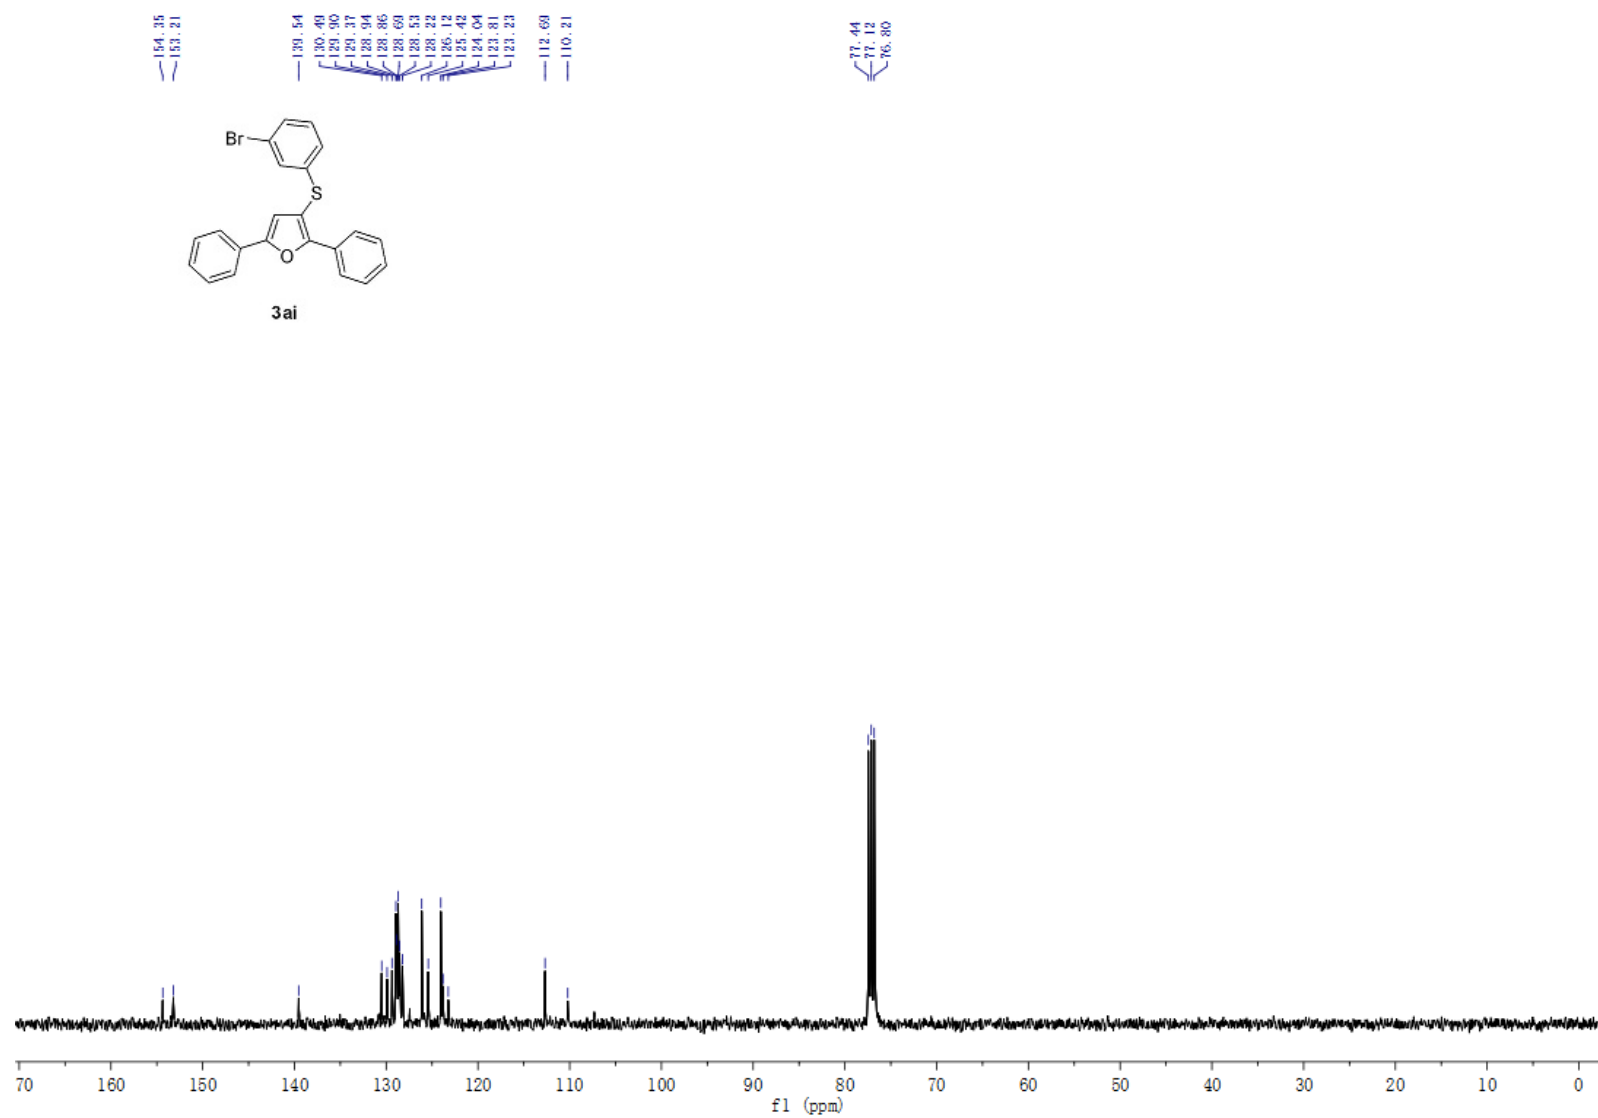

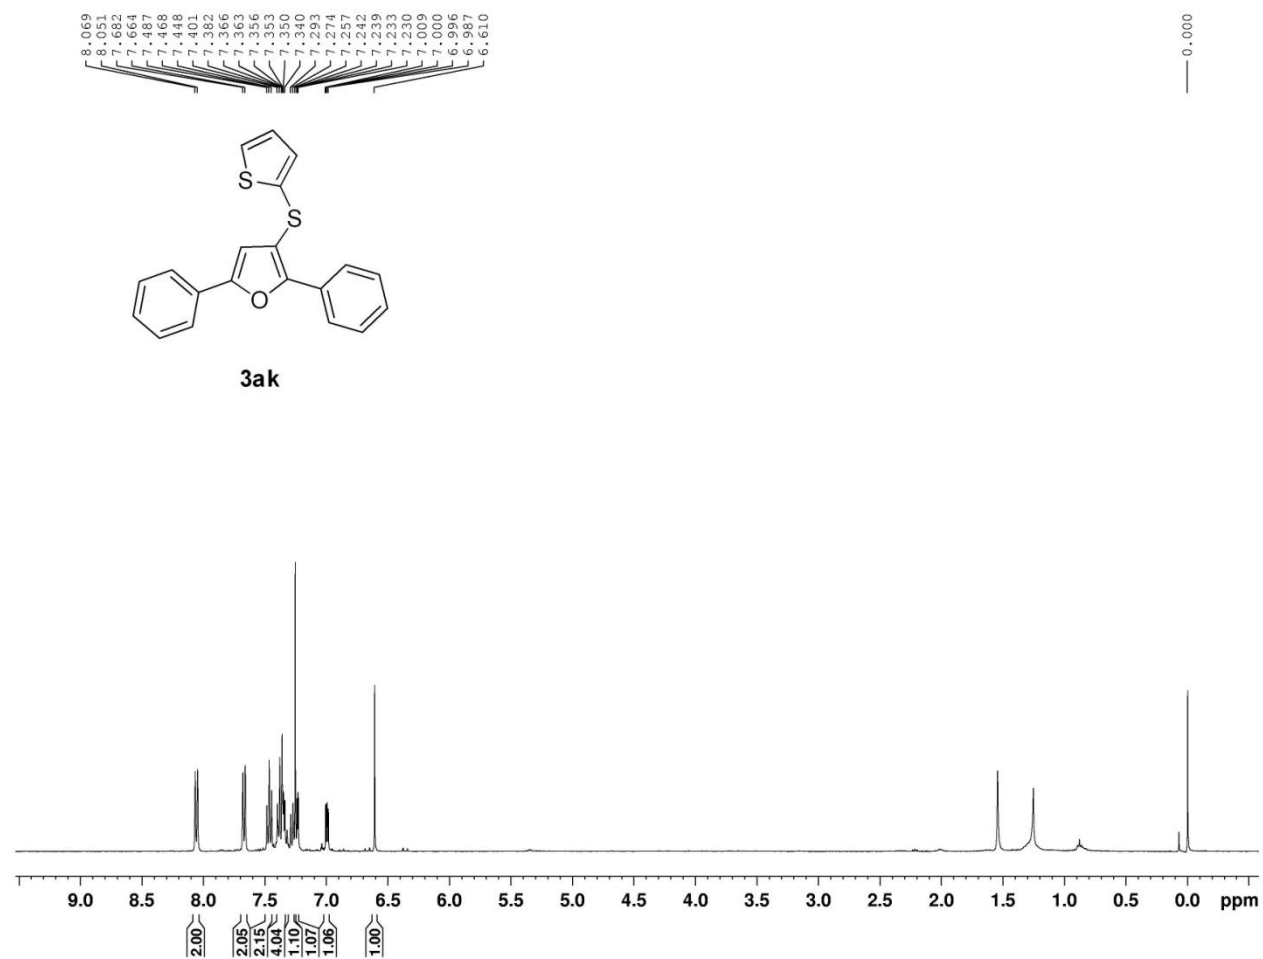

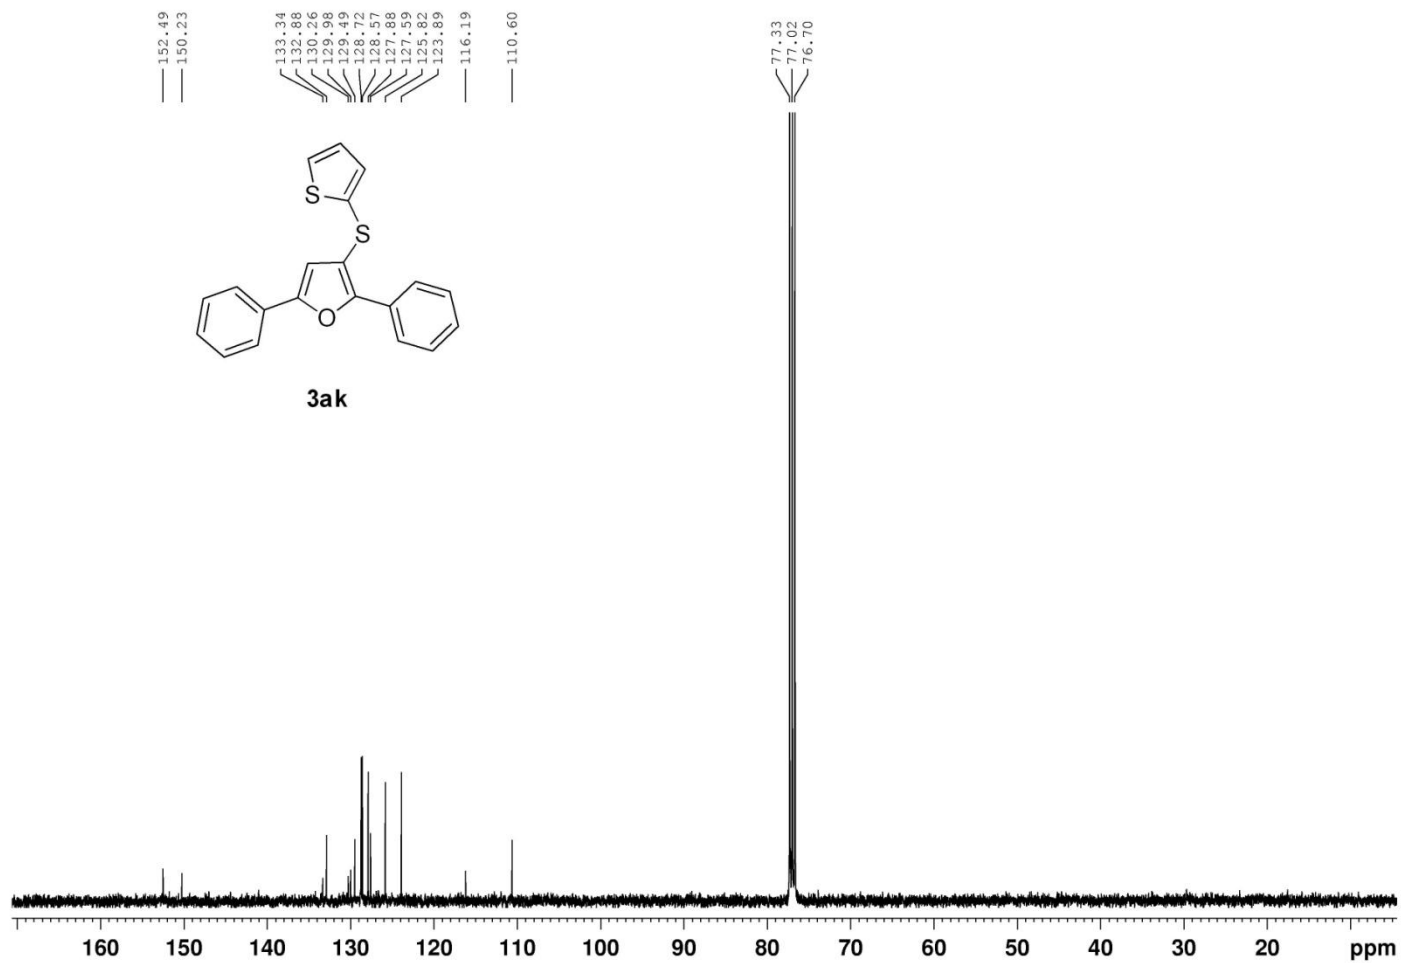

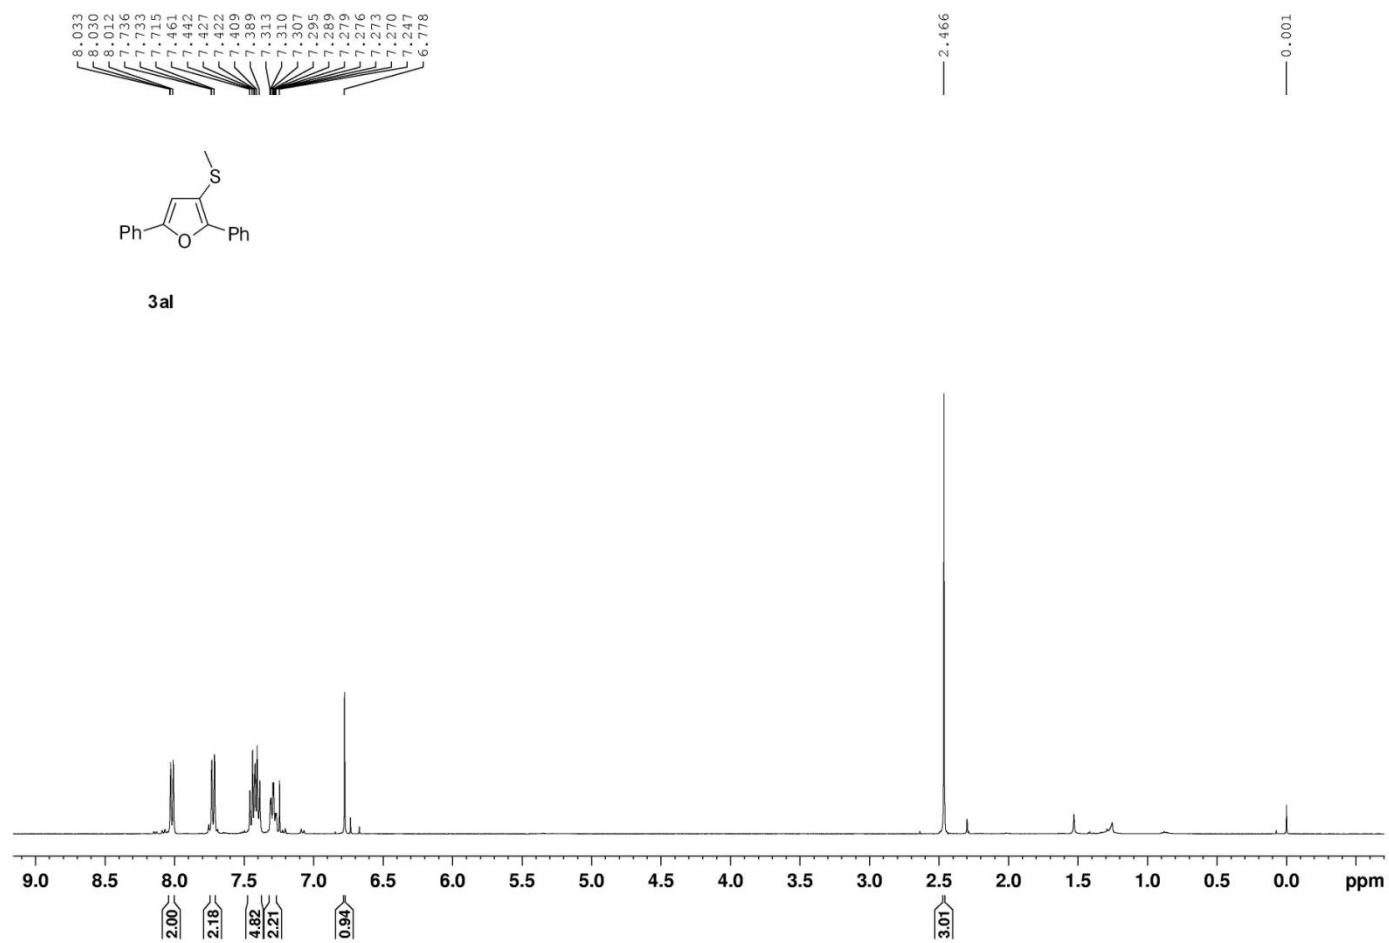

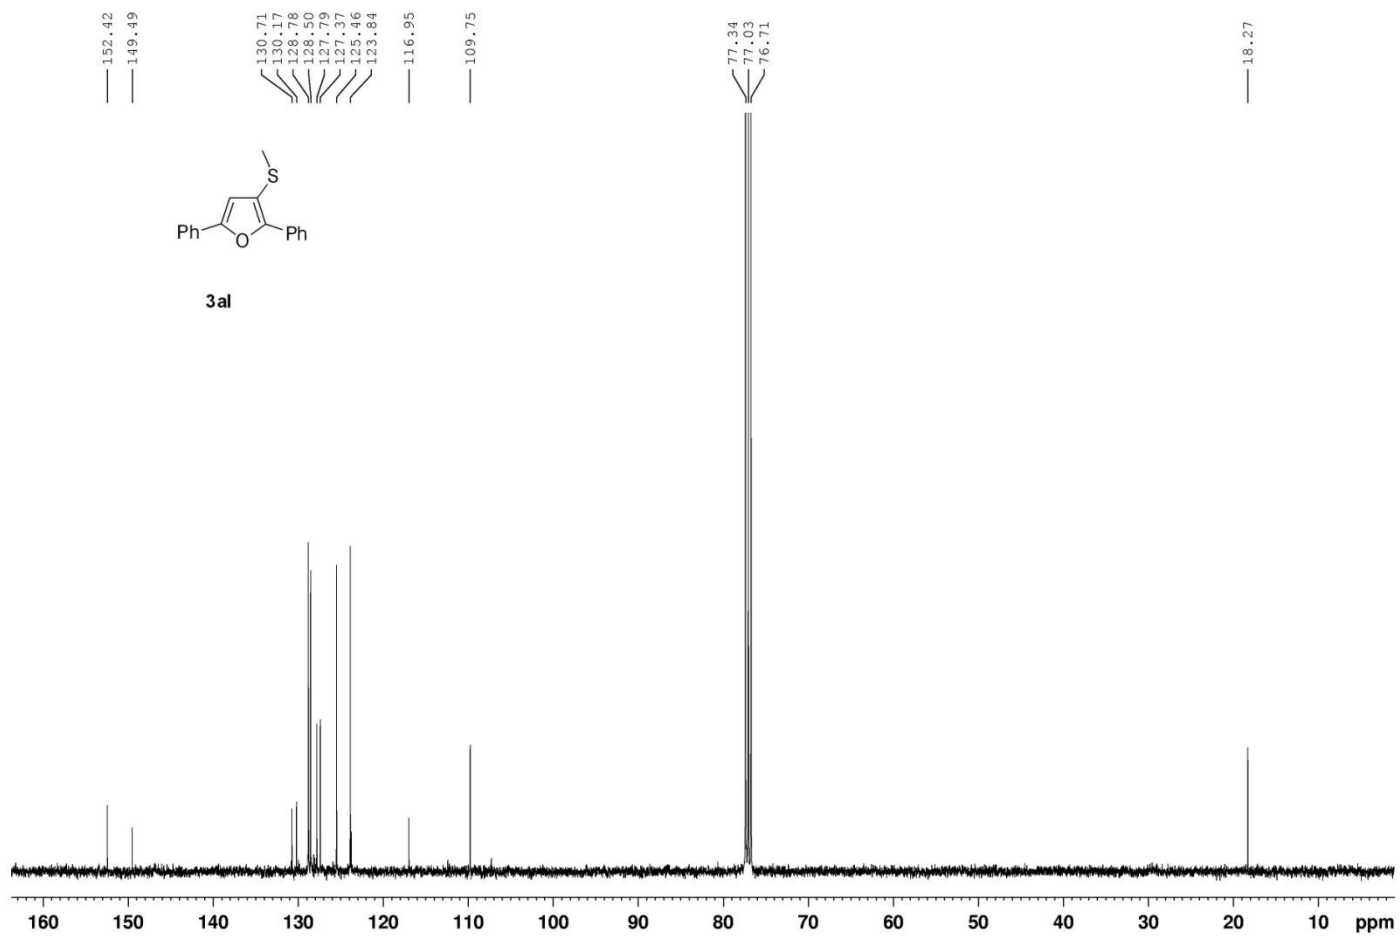

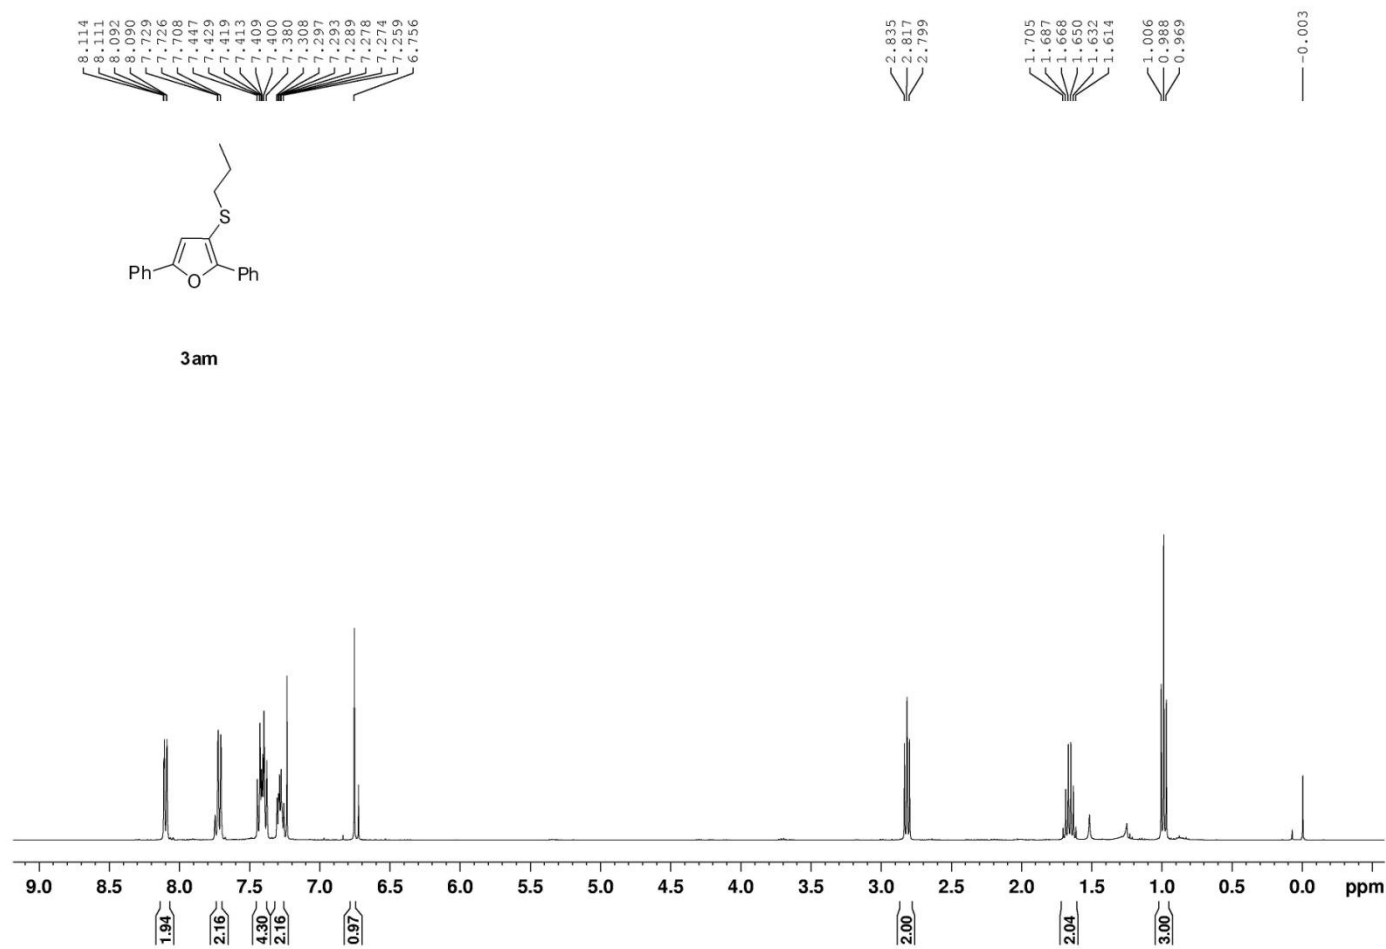

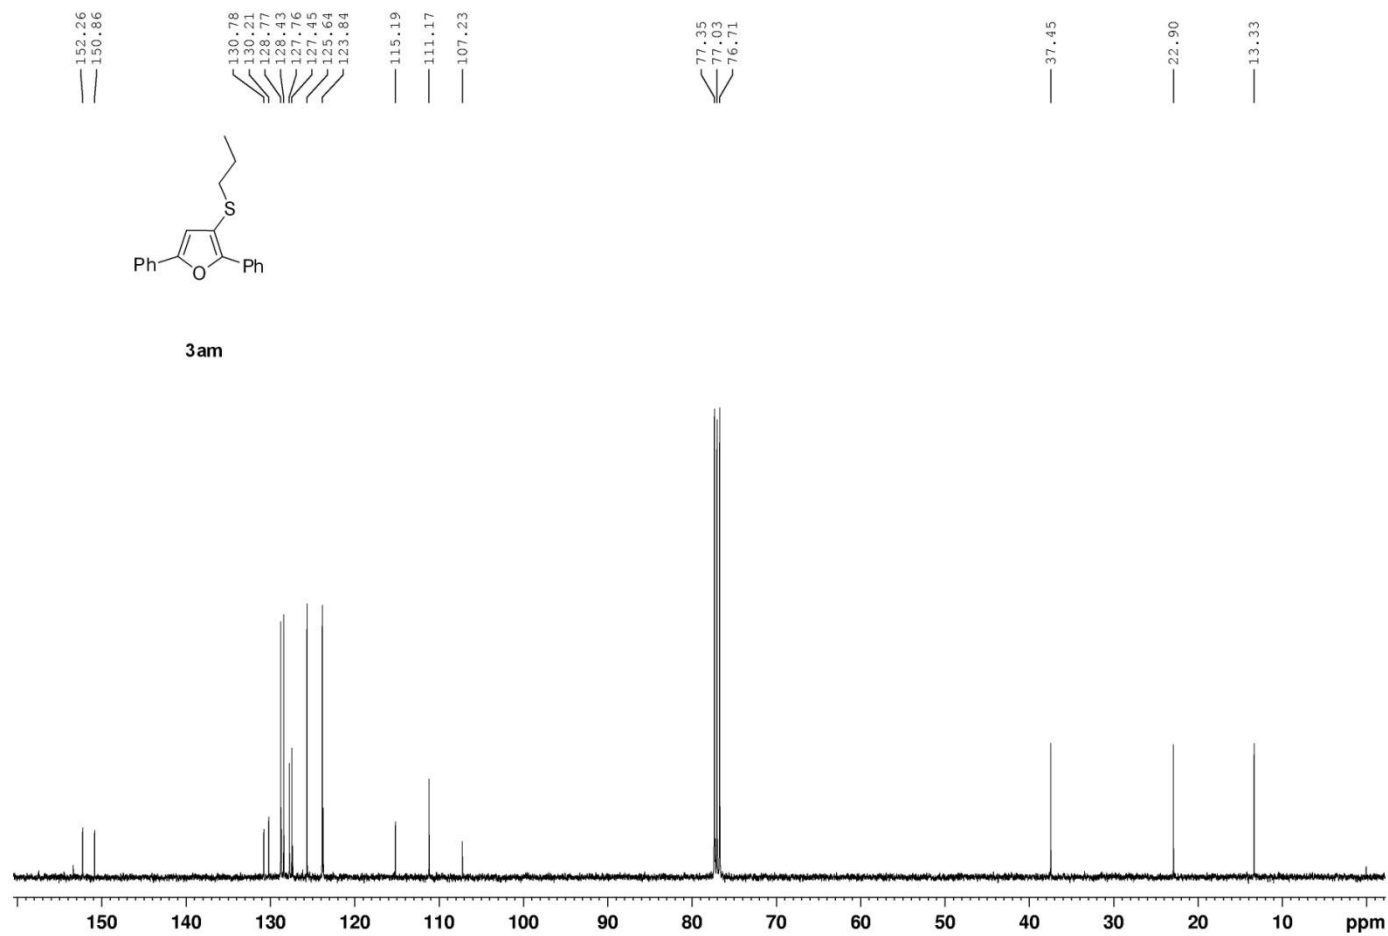

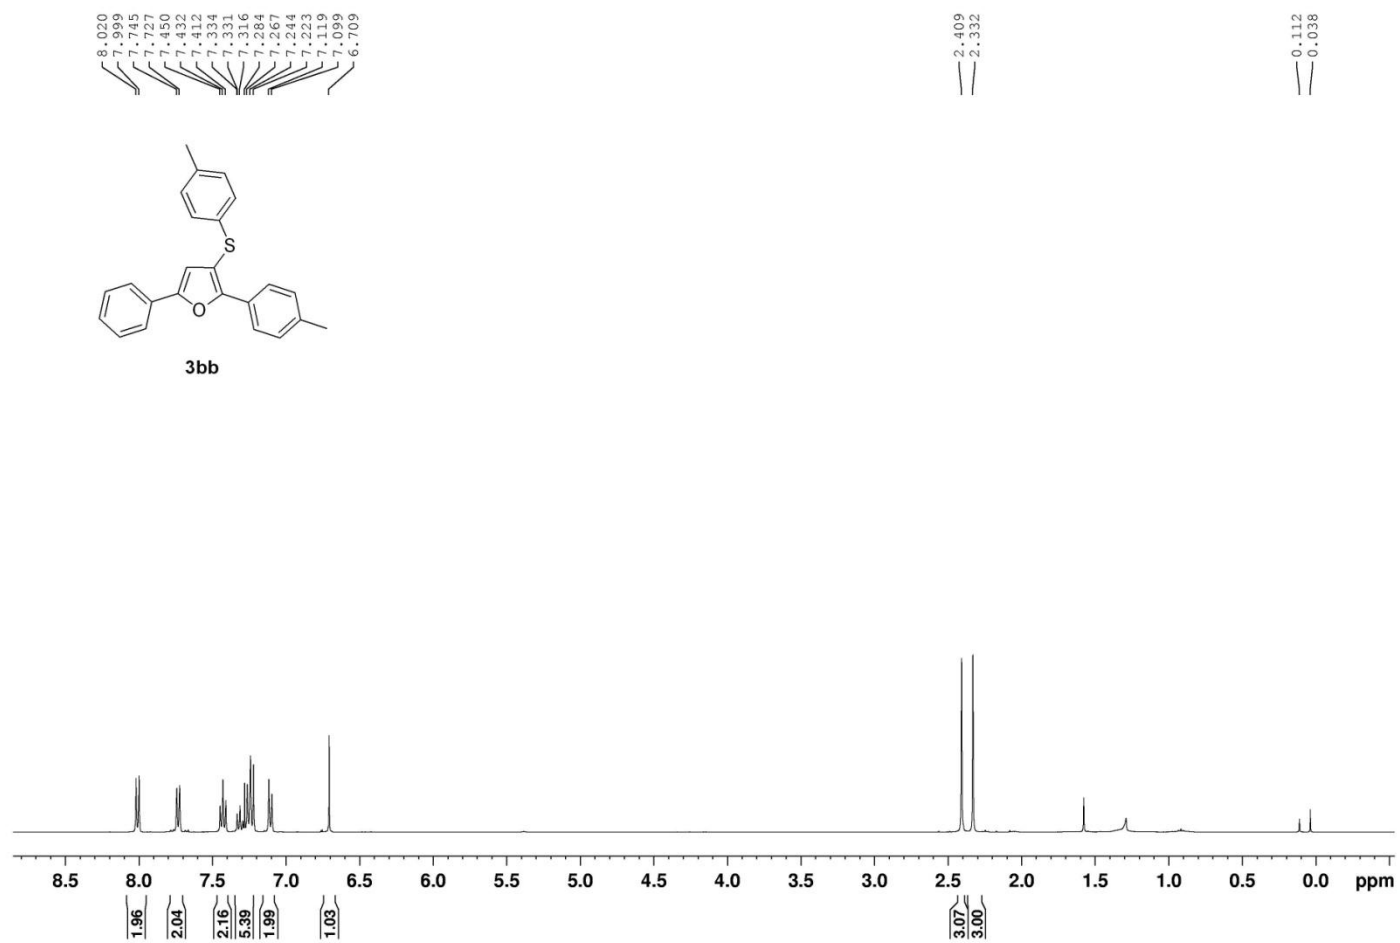

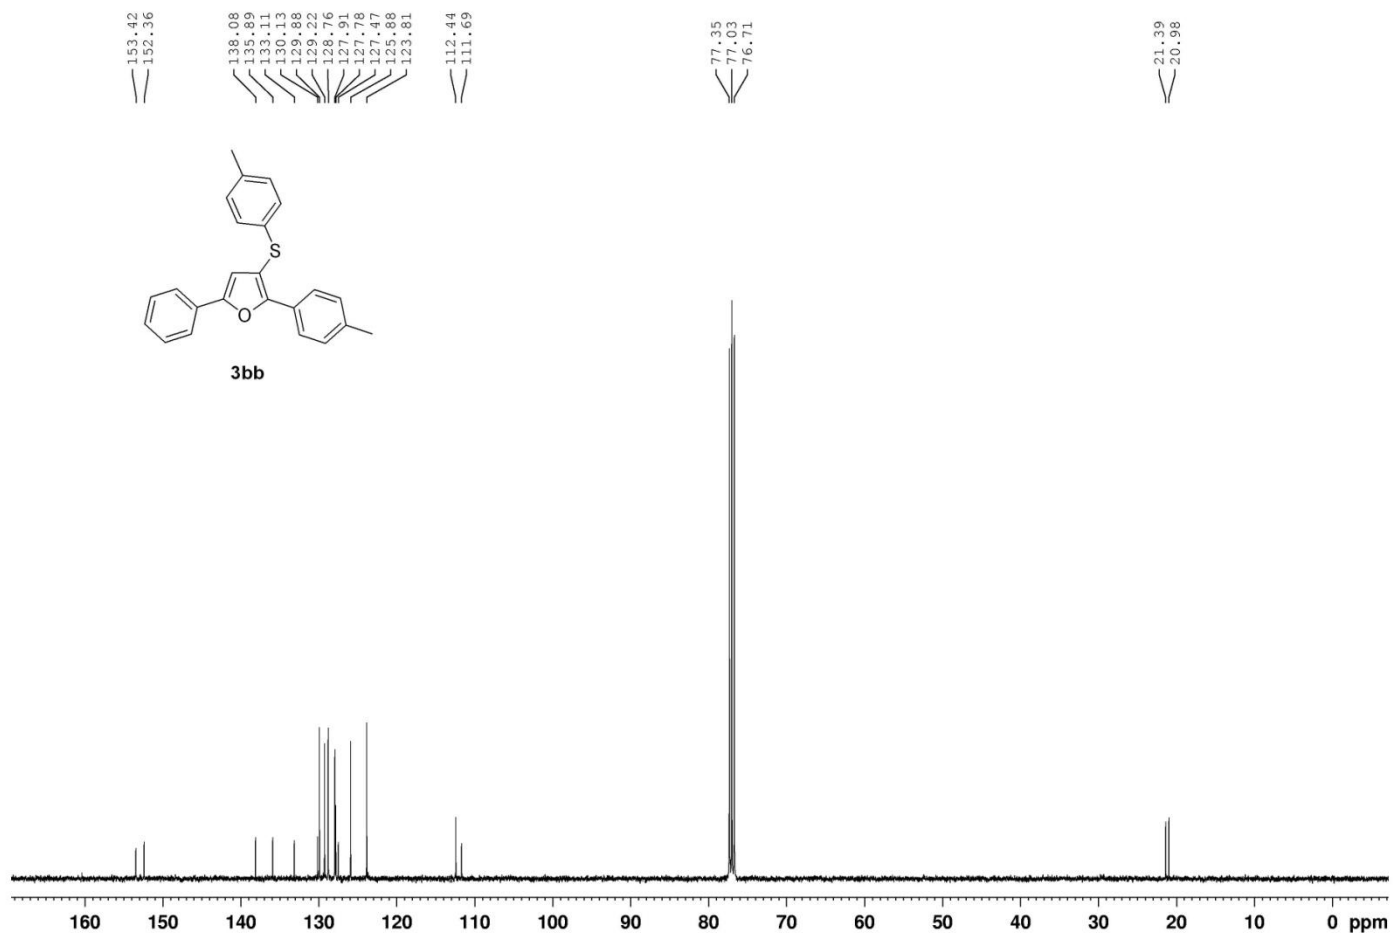

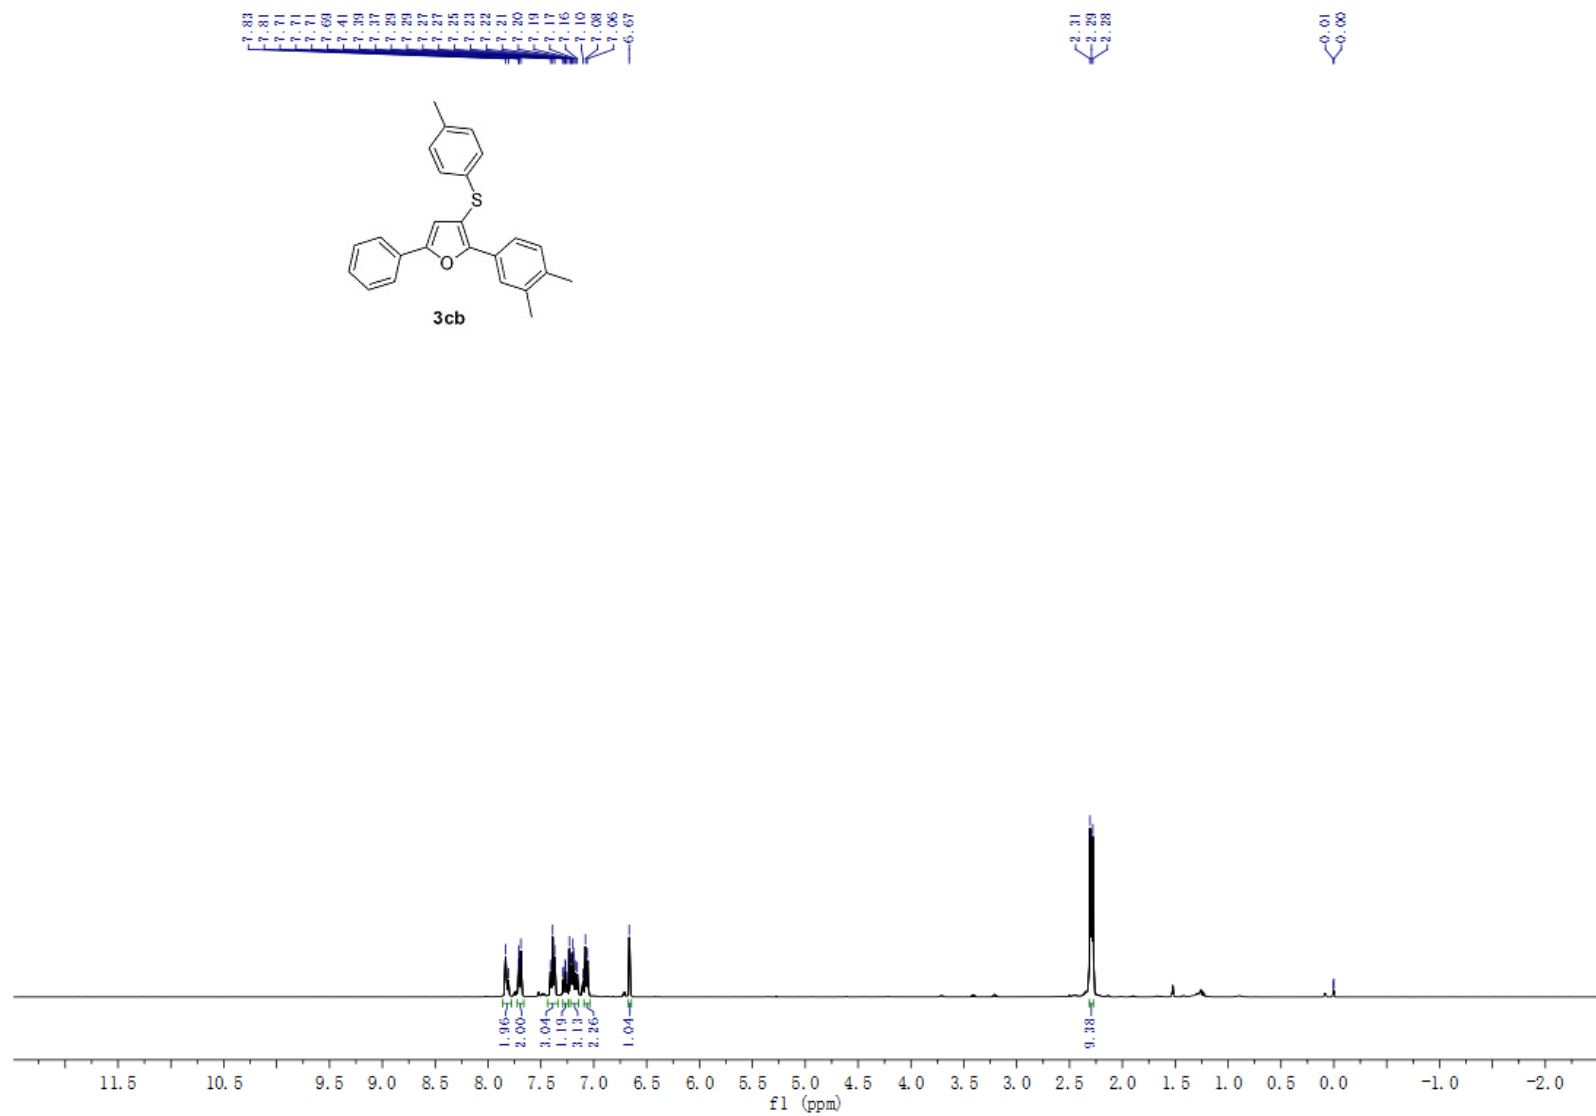

153.54  
152.36

136.95  
136.77  
135.97  
133.29  
130.26  
130.11  
129.66  
129.01  
128.69  
128.35  
127.88  
127.62  
127.06  
123.89

112.60  
111.80

77.46  
77.14  
76.82

21.09  
20.88  
19.80

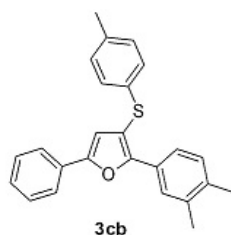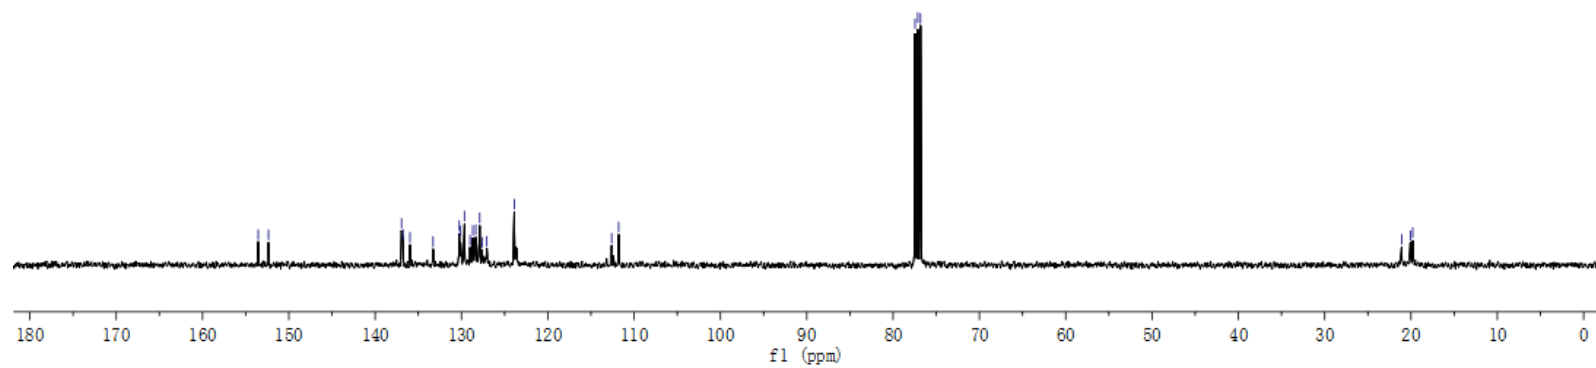



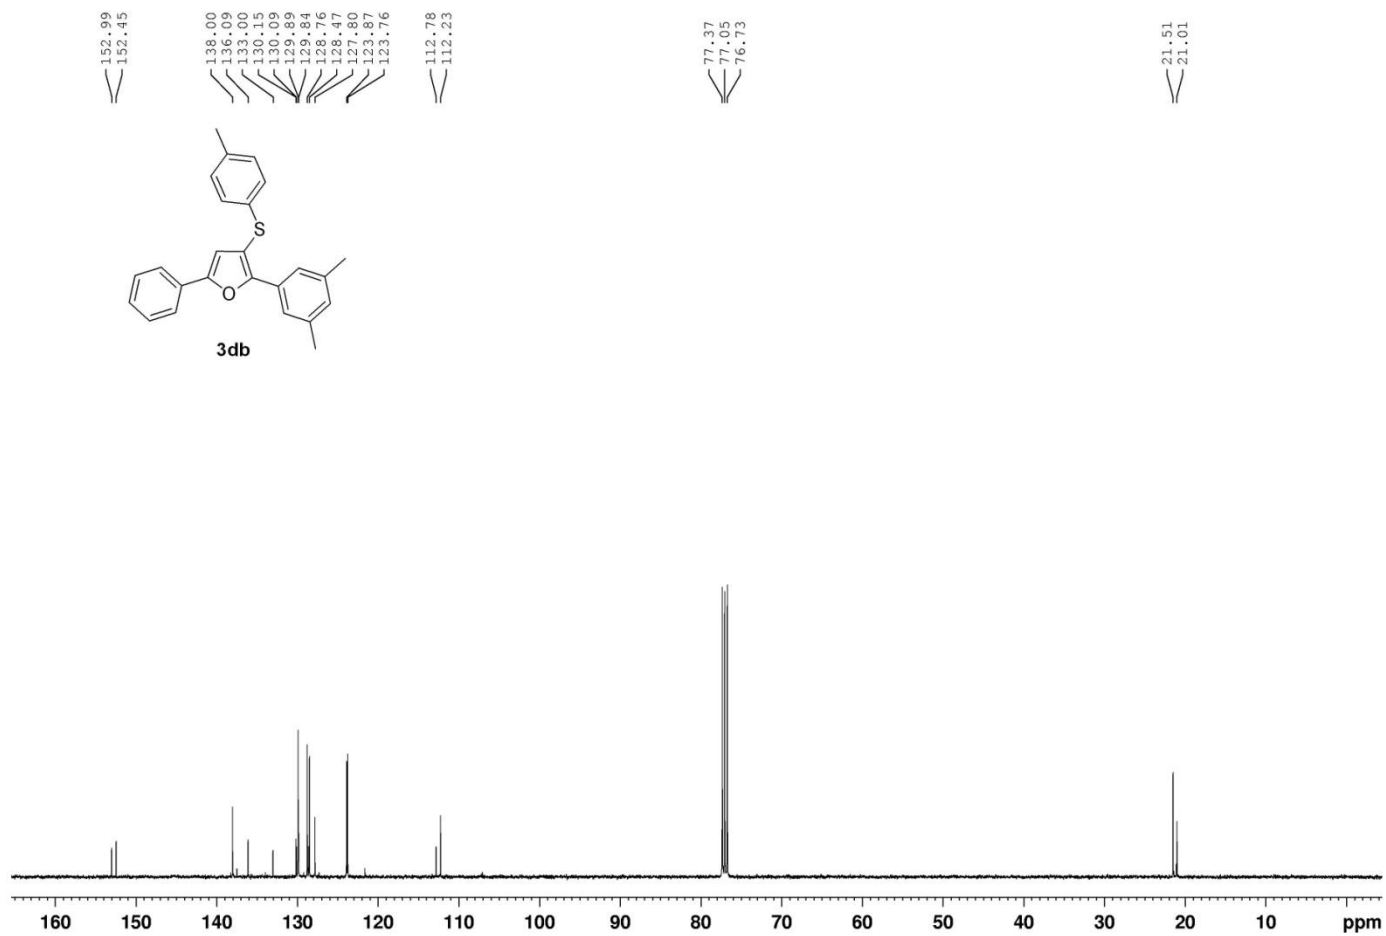

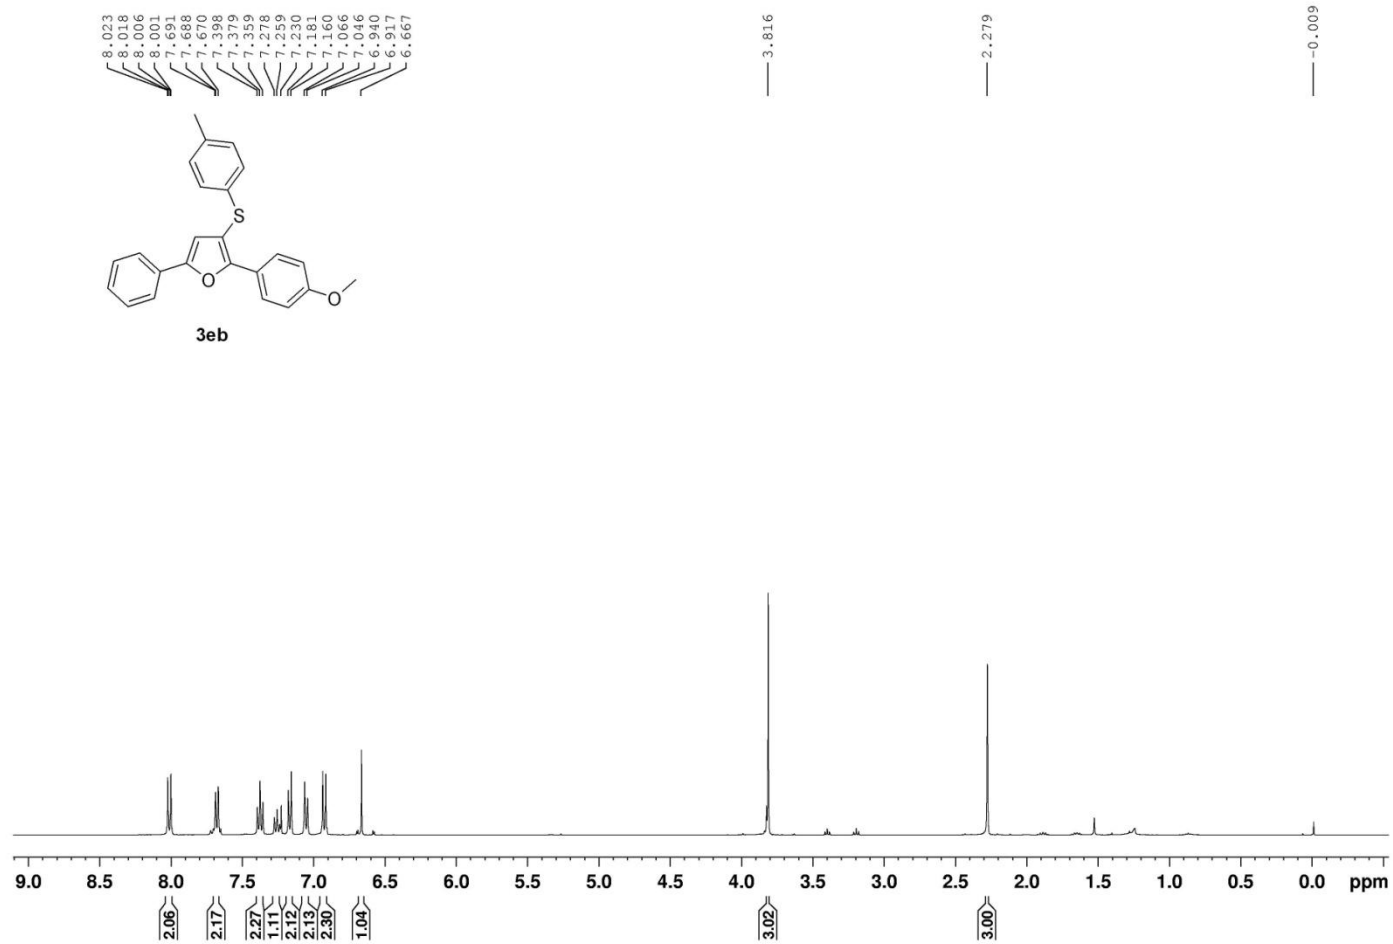

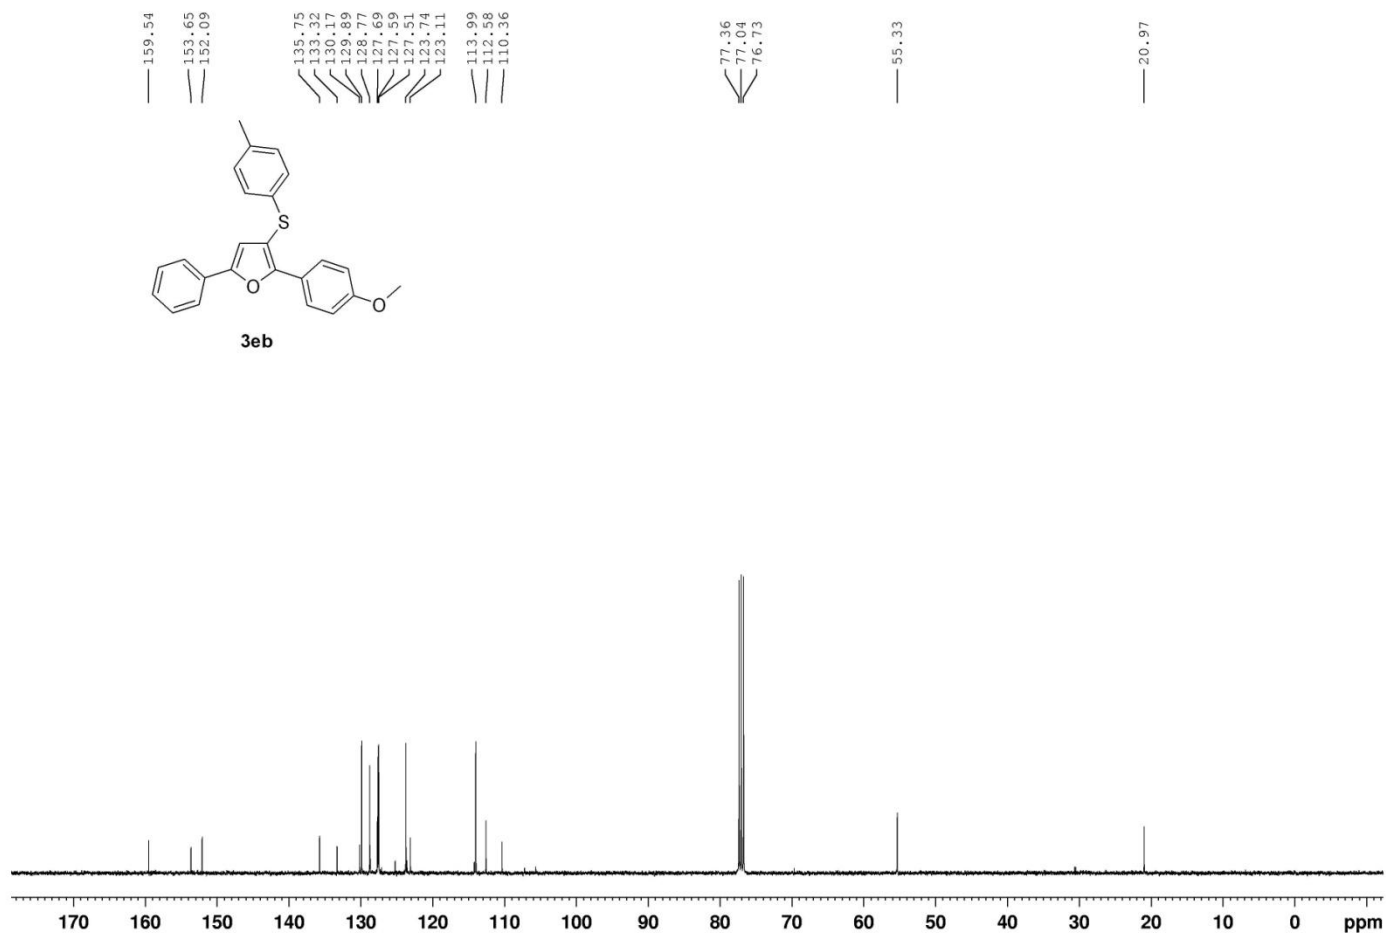

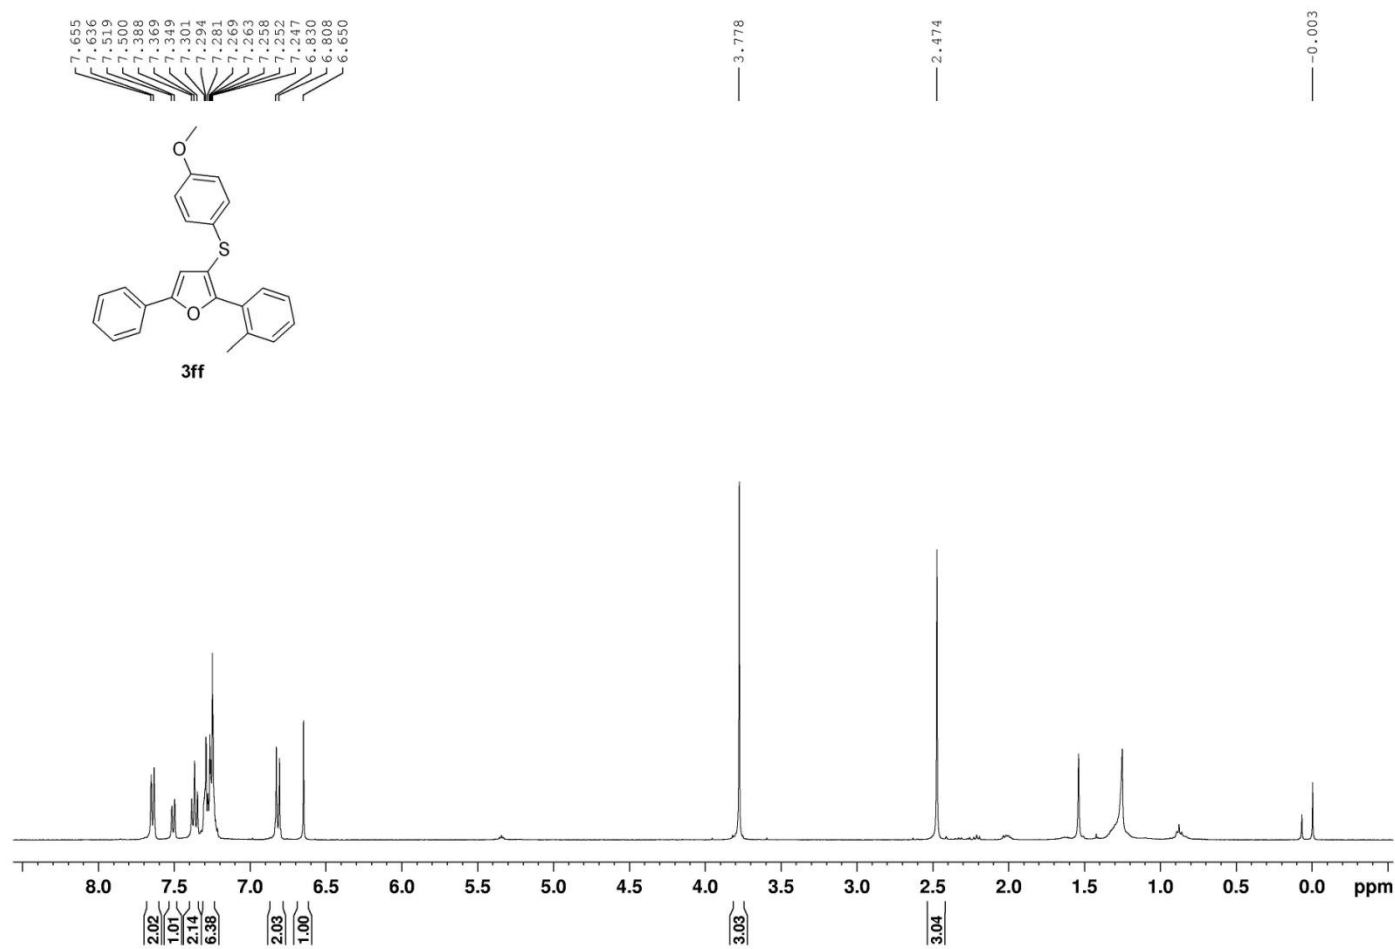

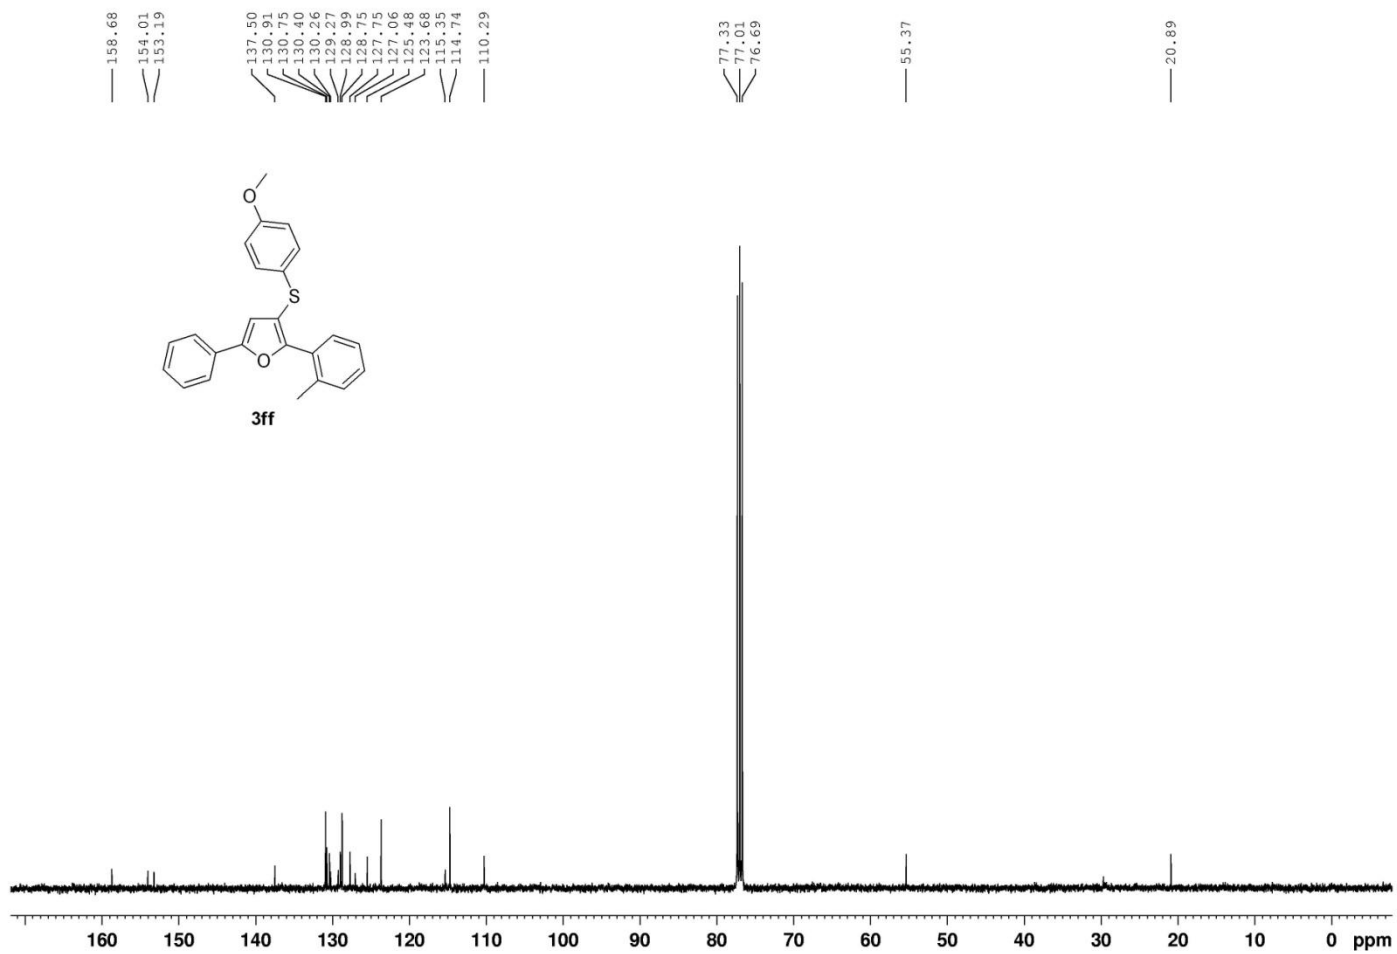

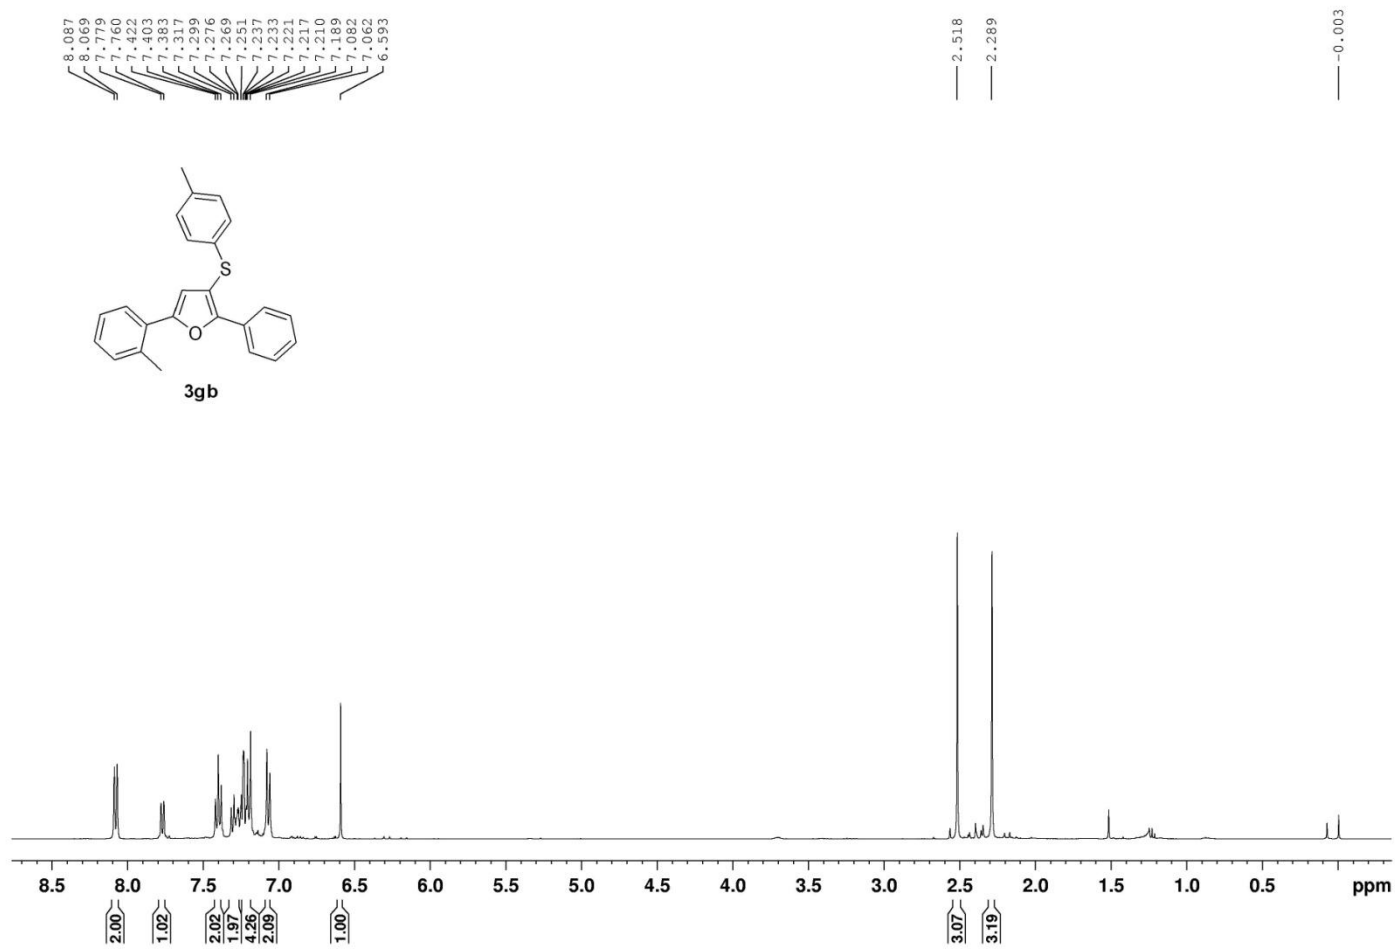

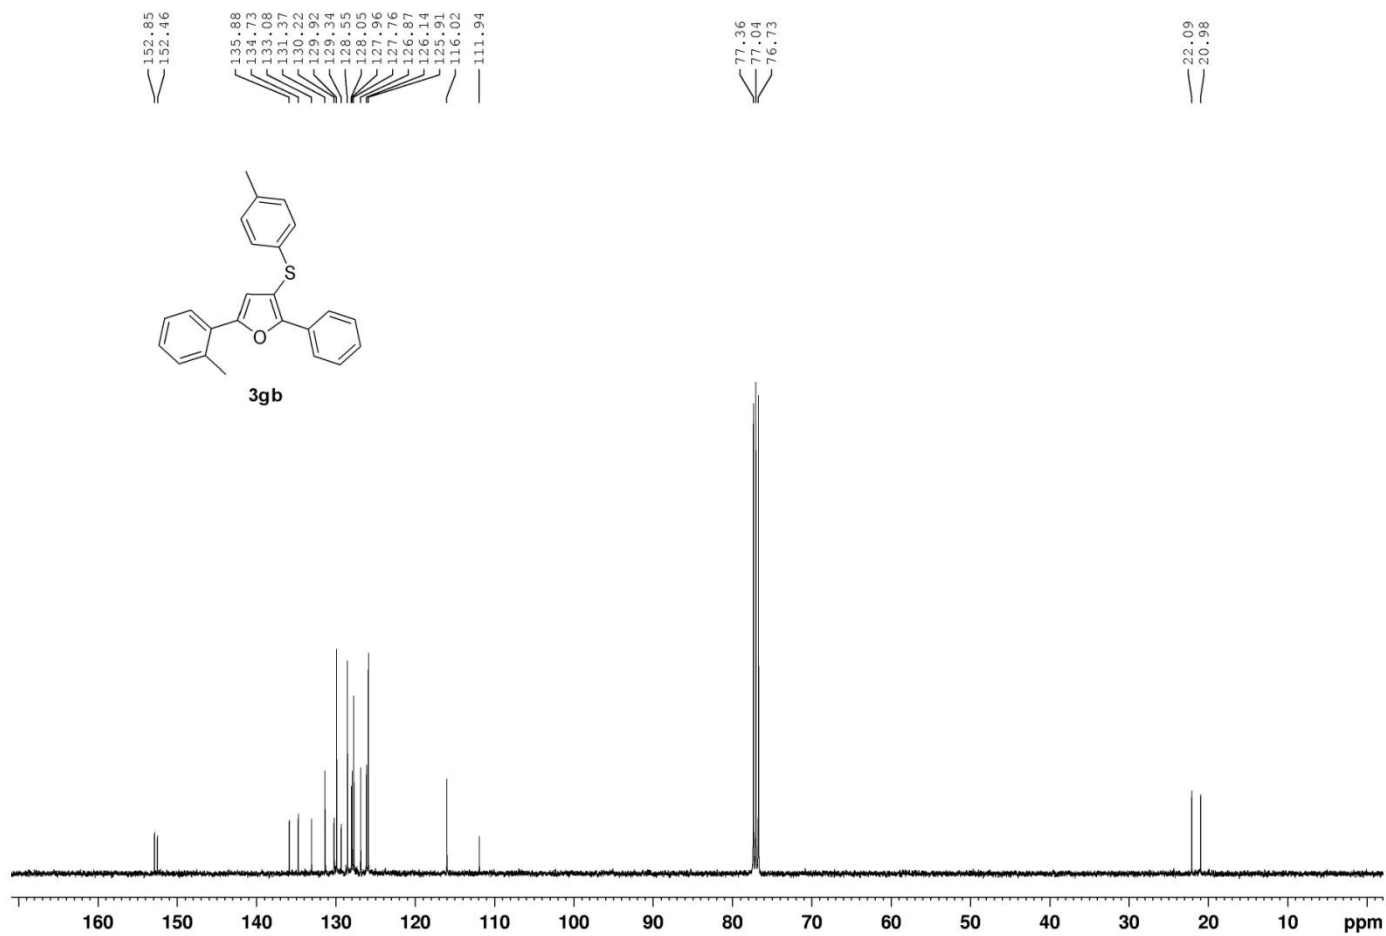

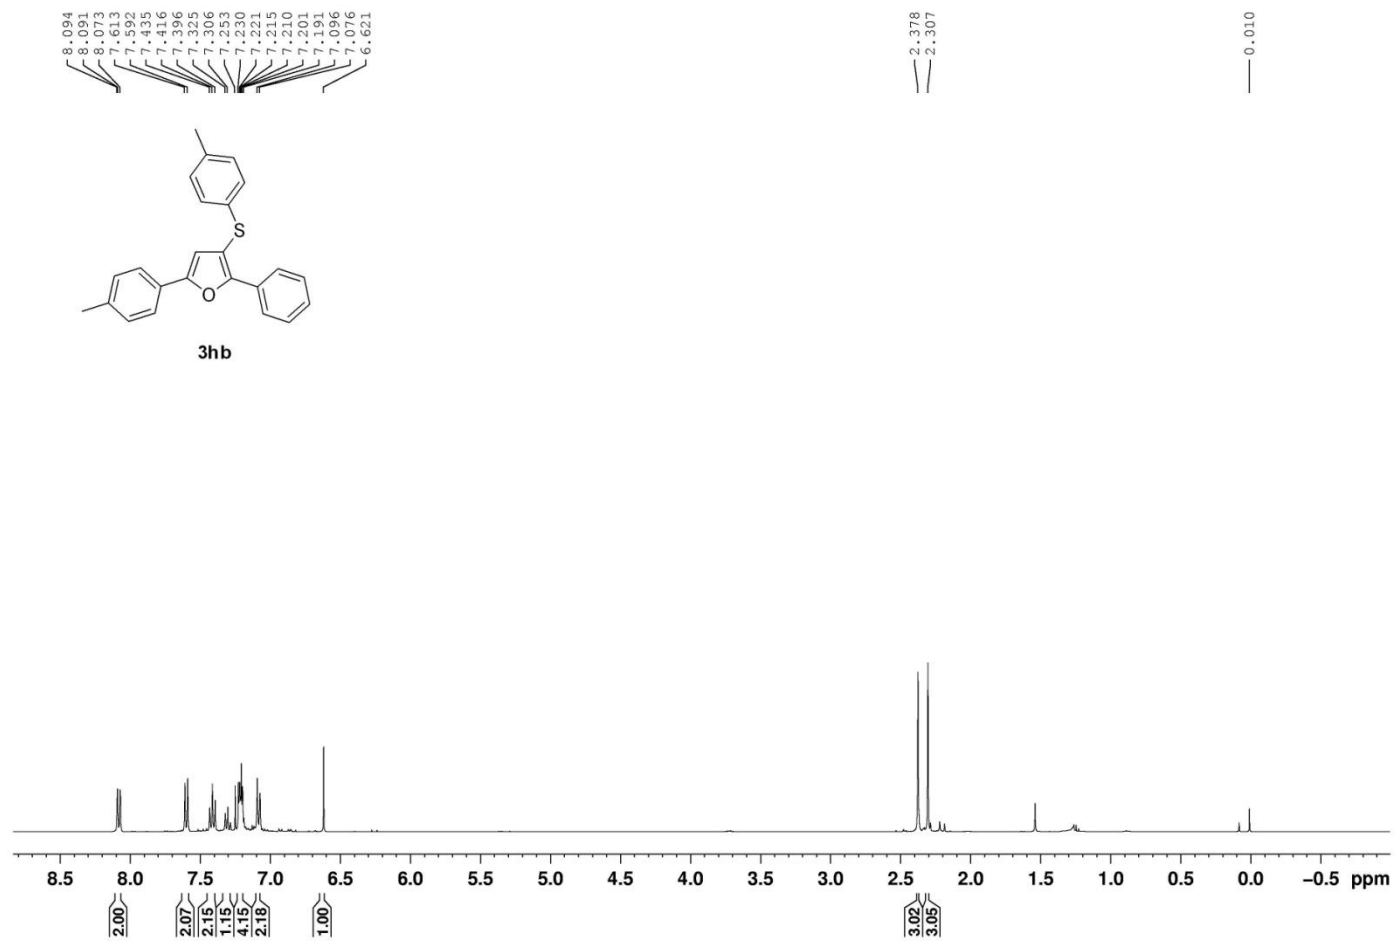

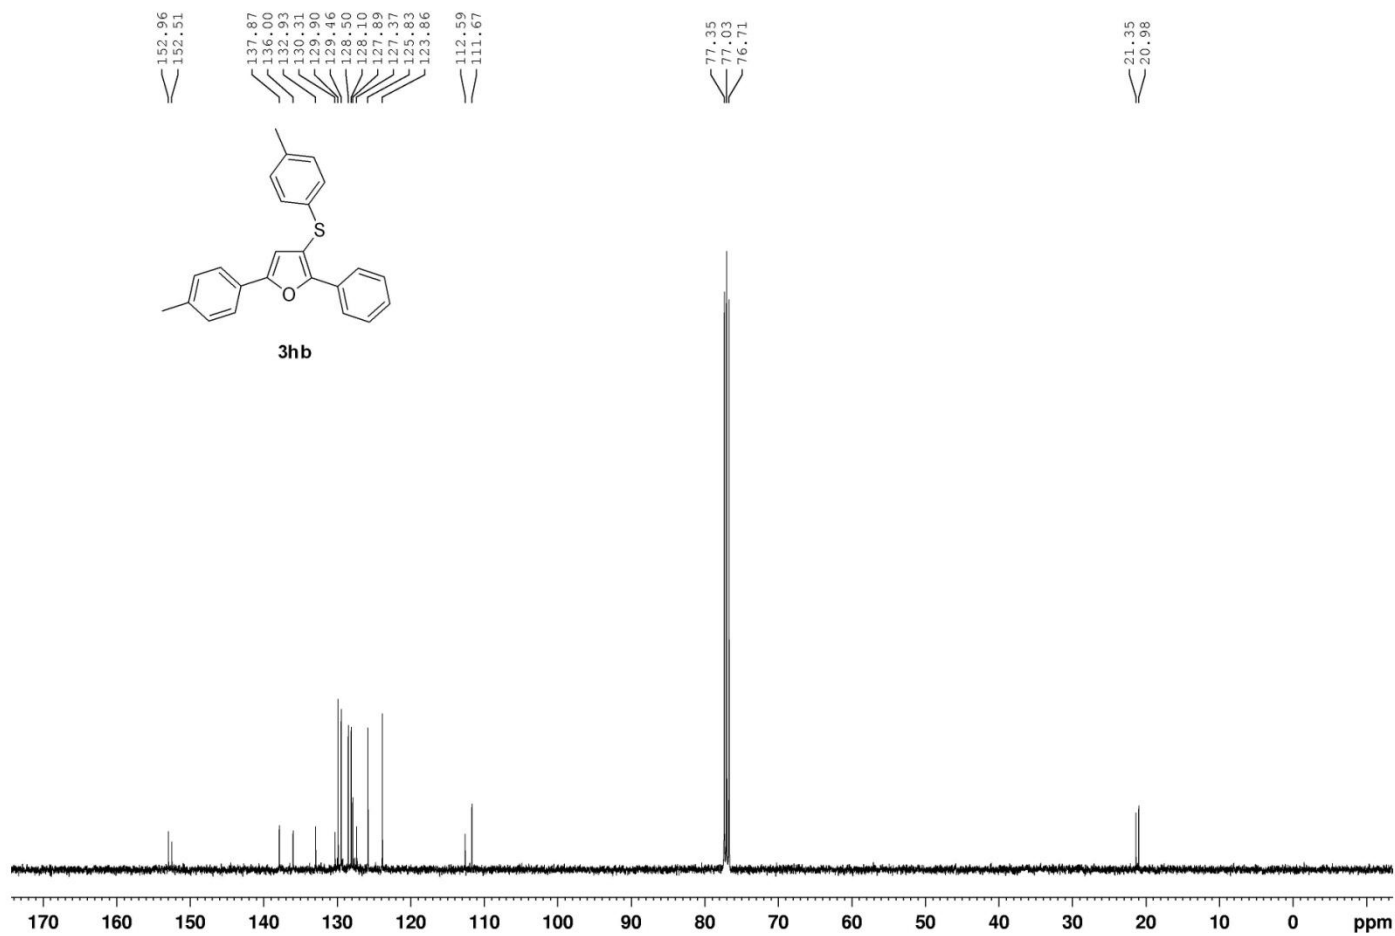

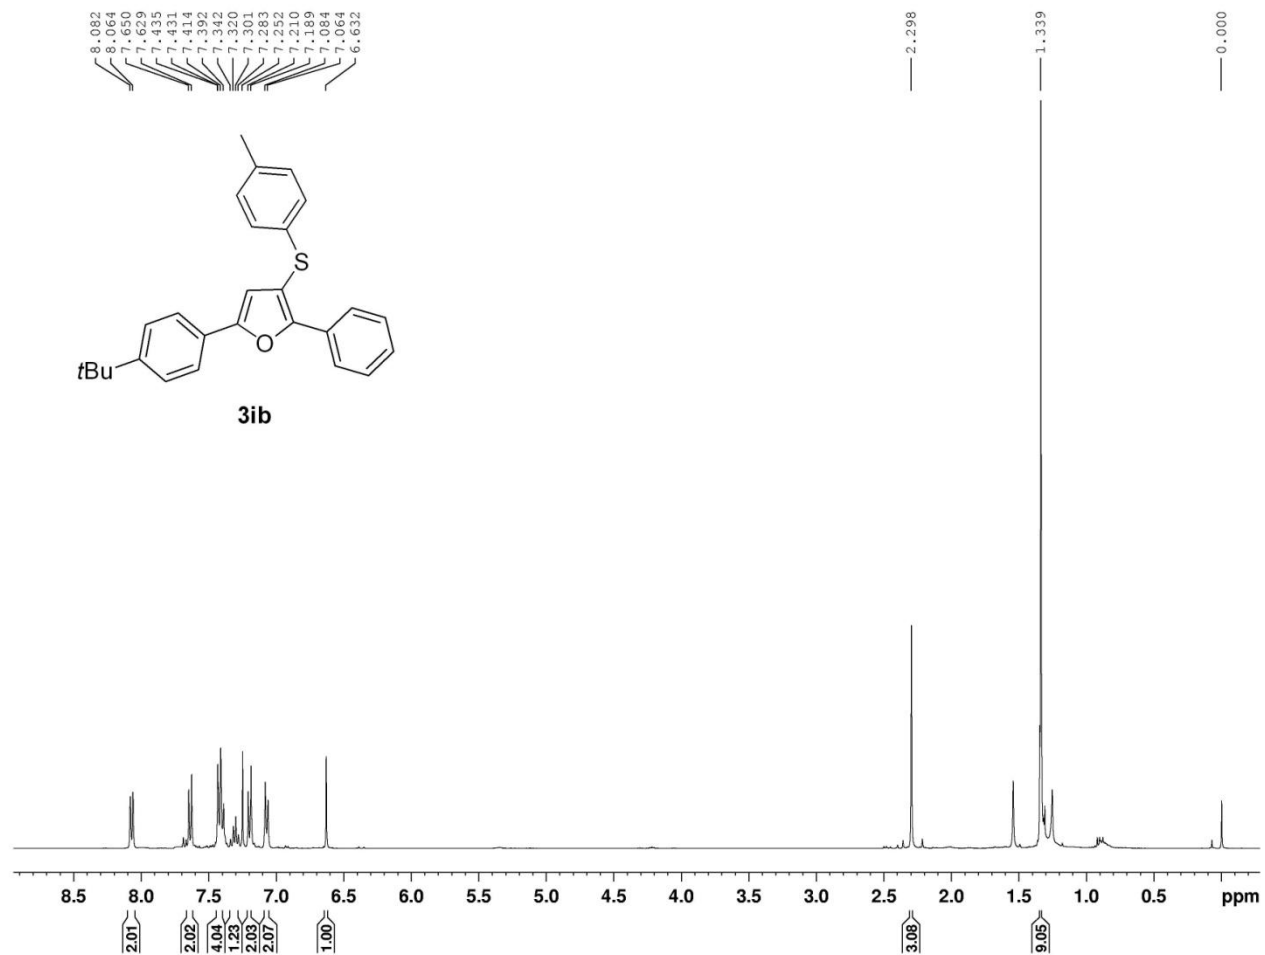

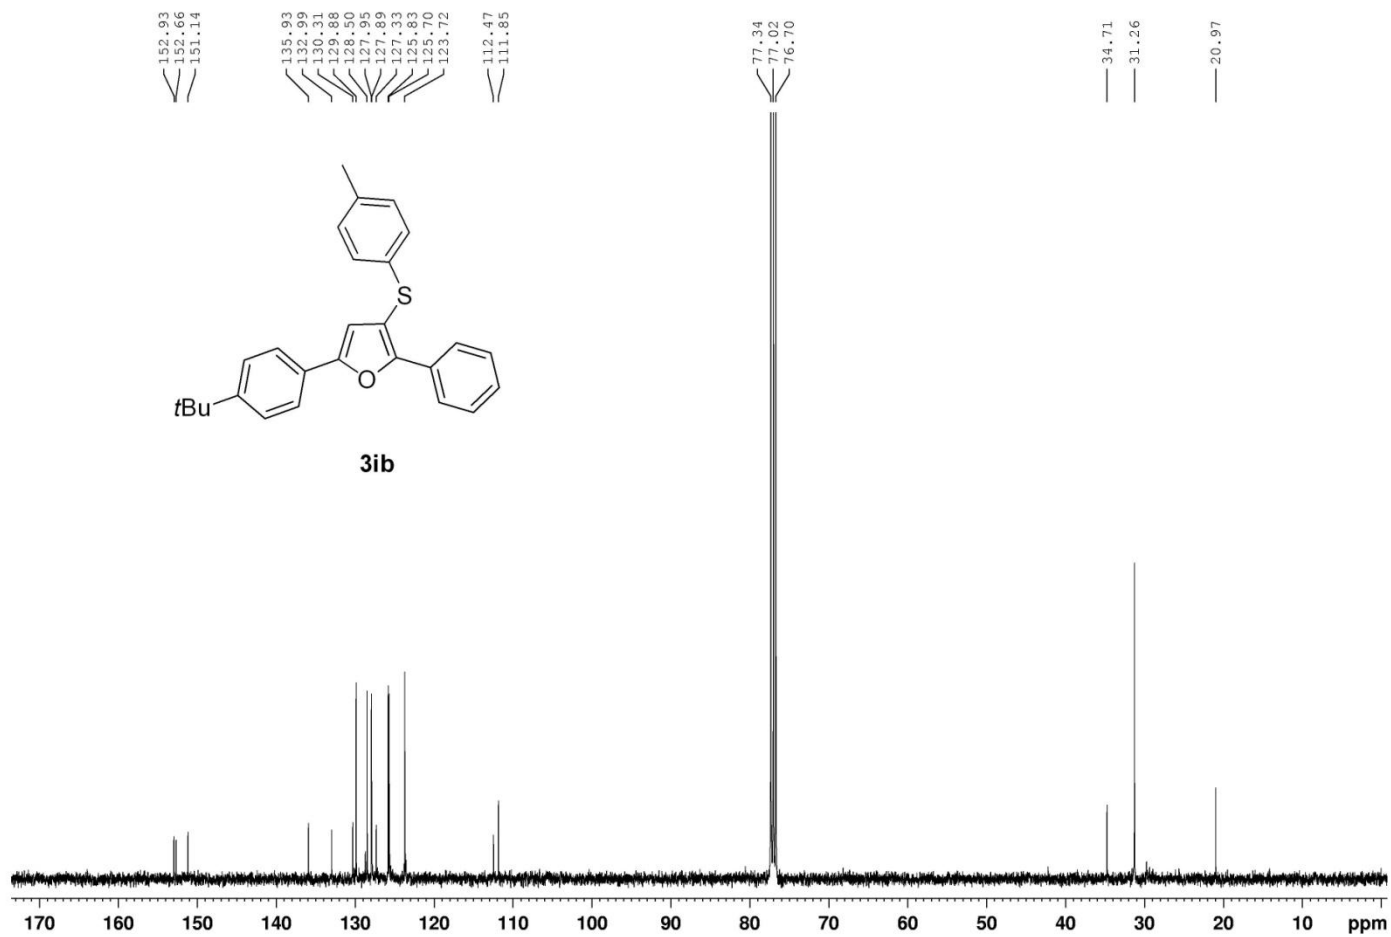

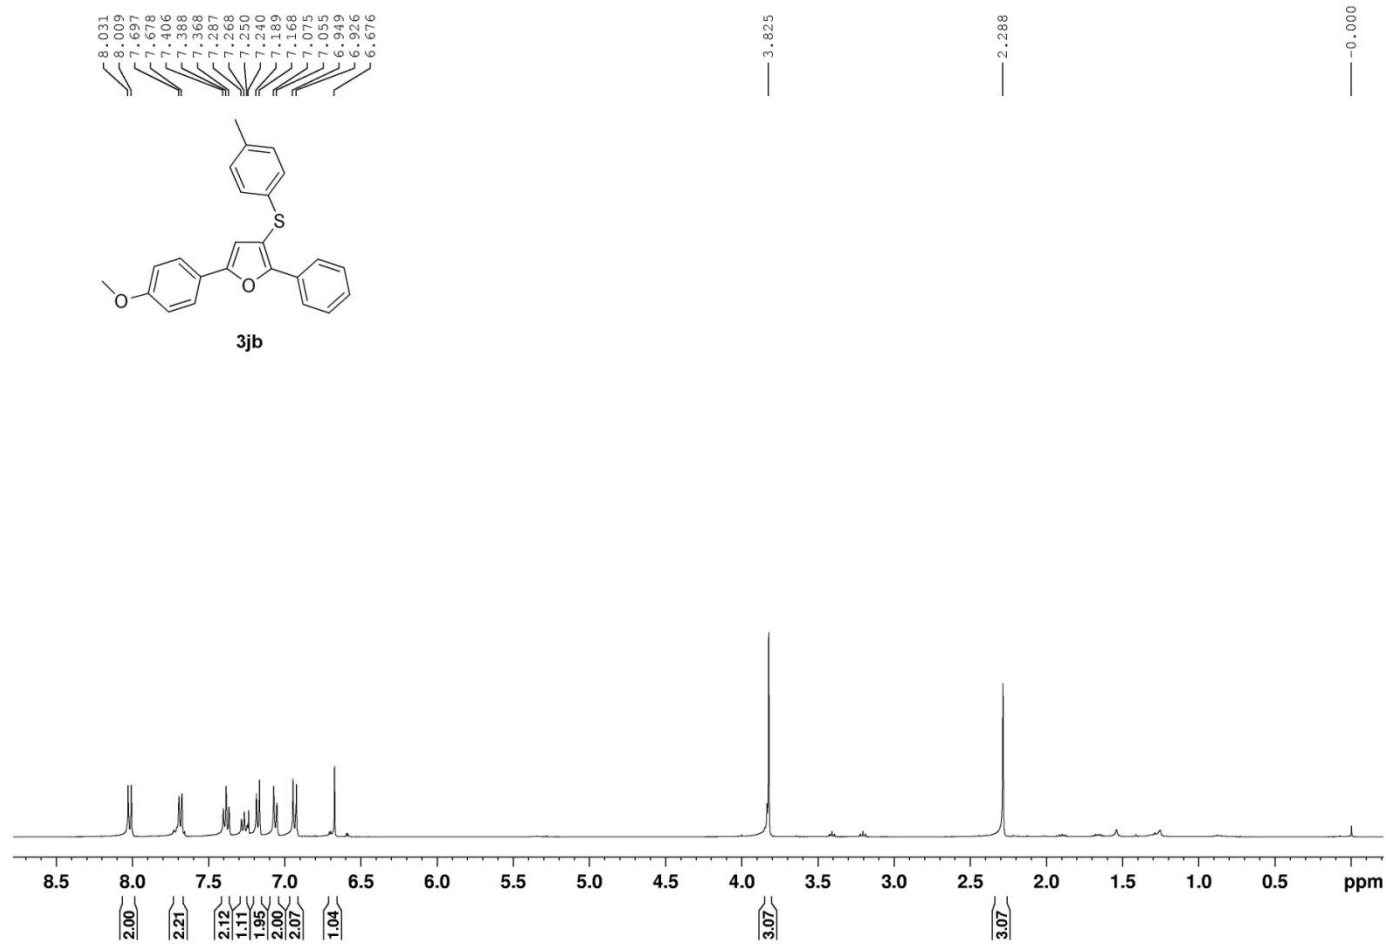

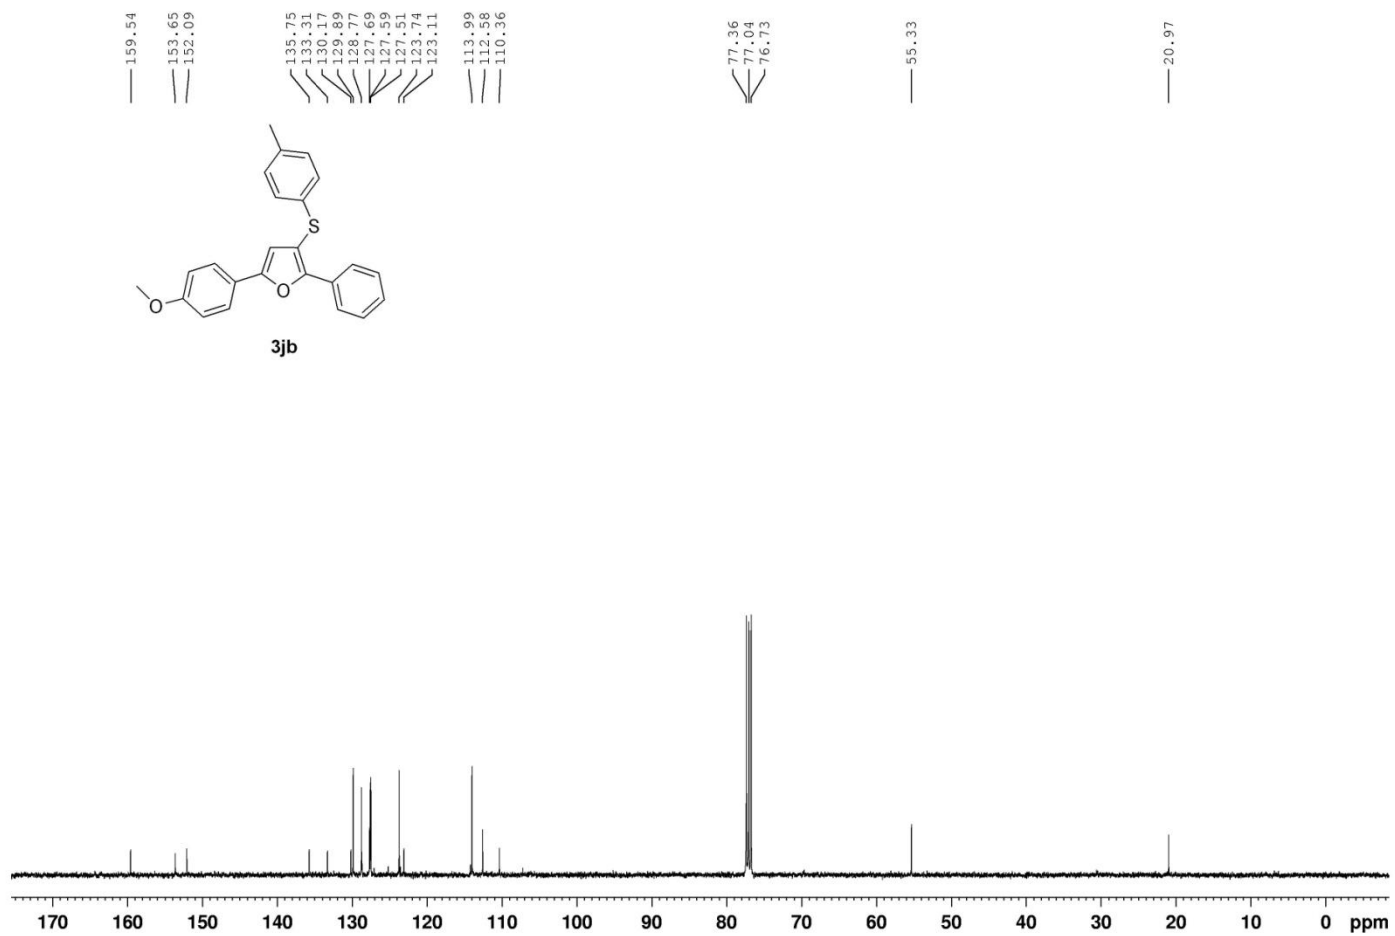

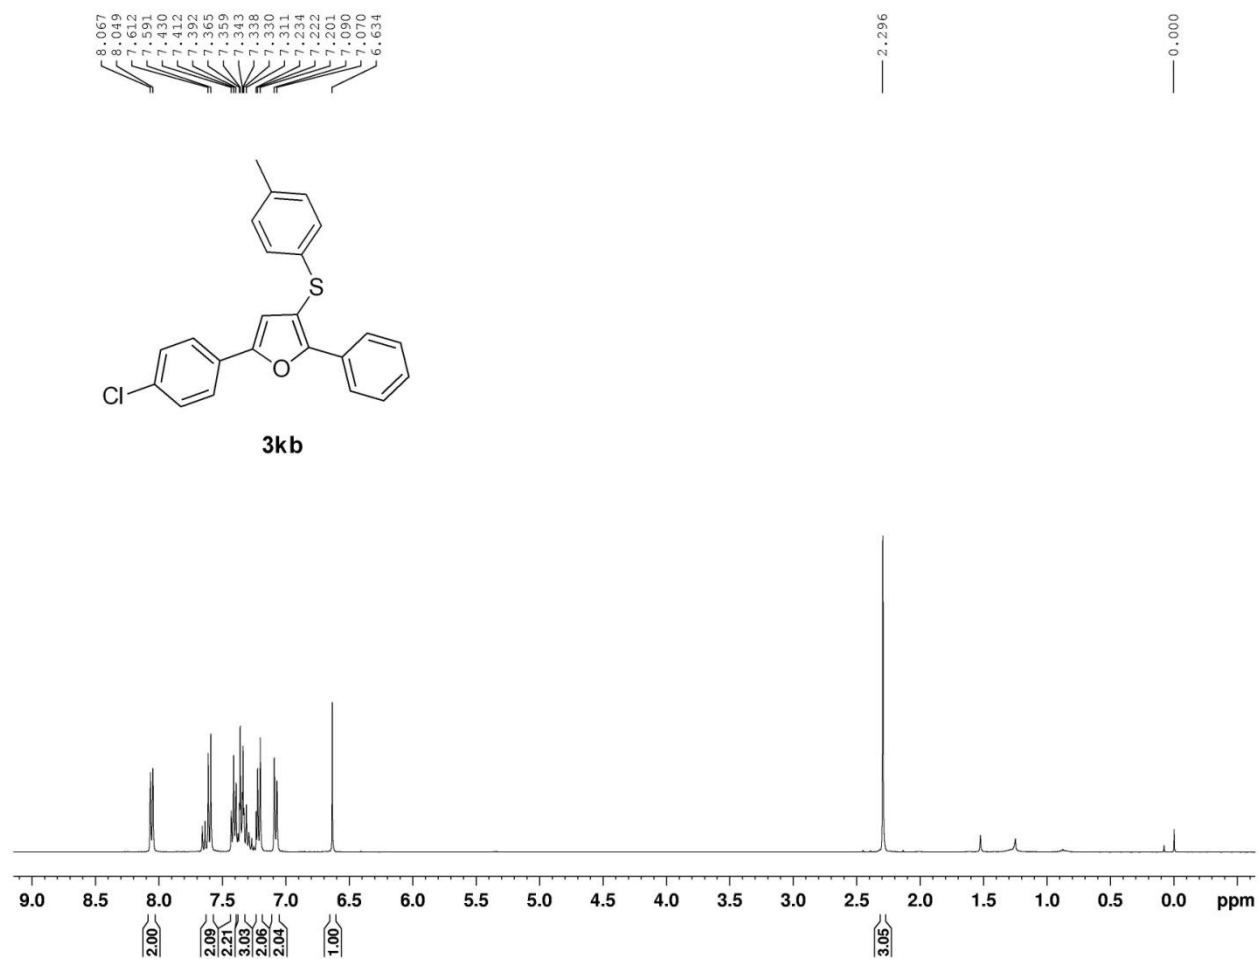

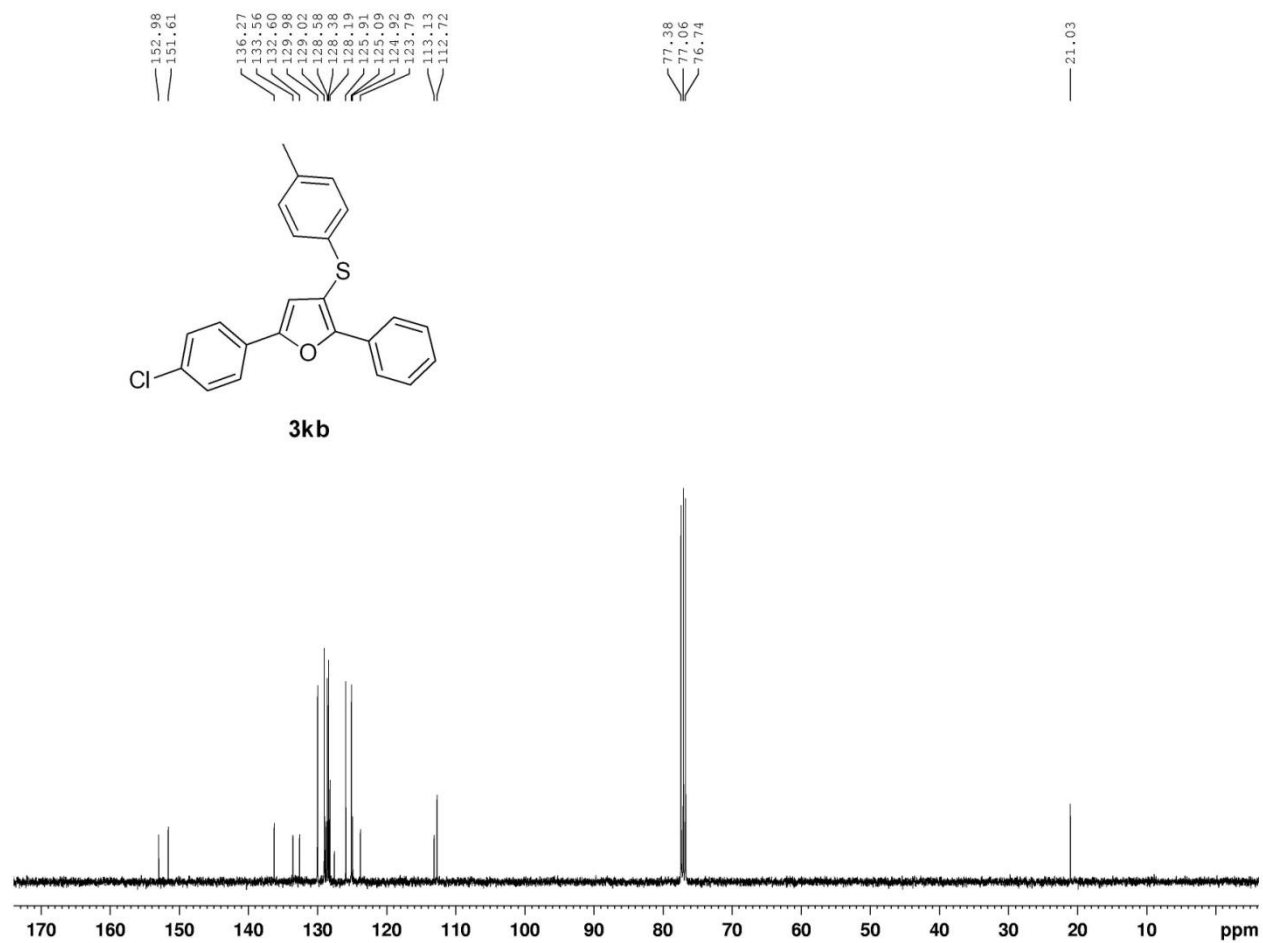

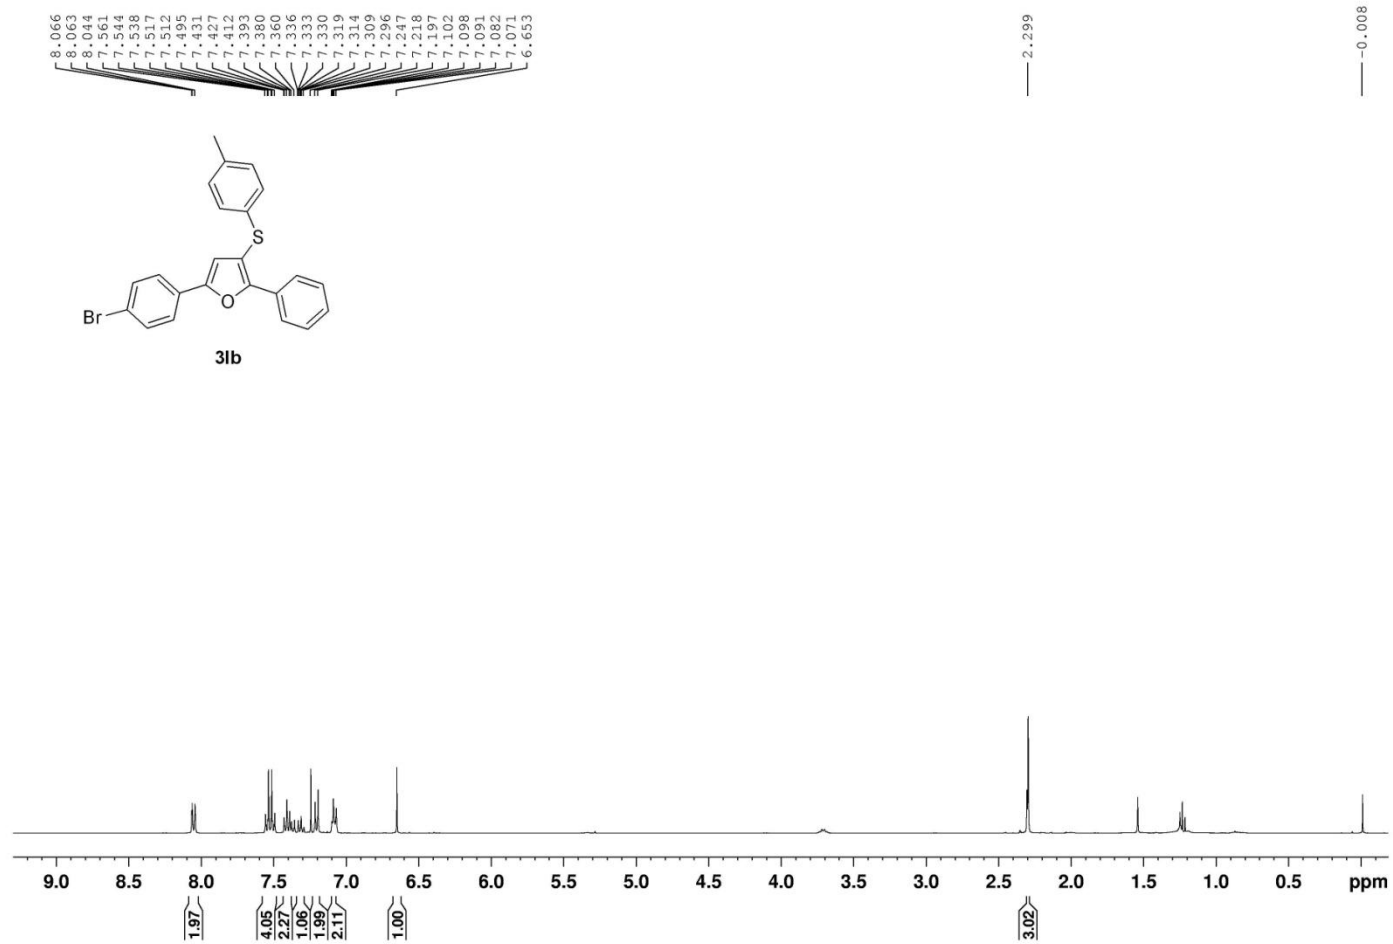

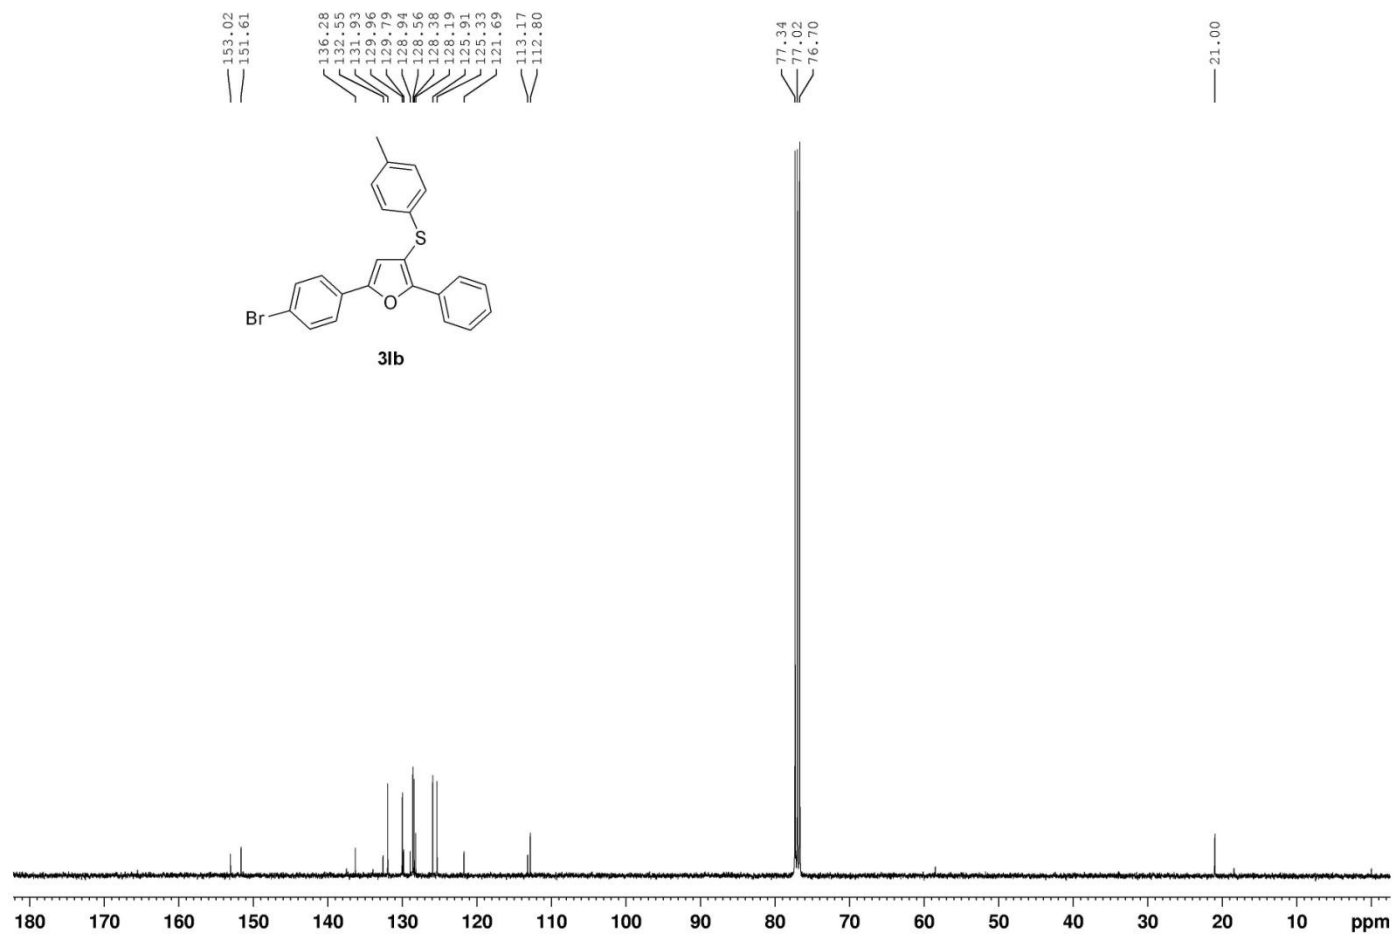

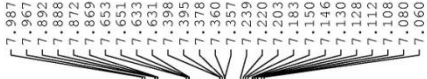

3mb

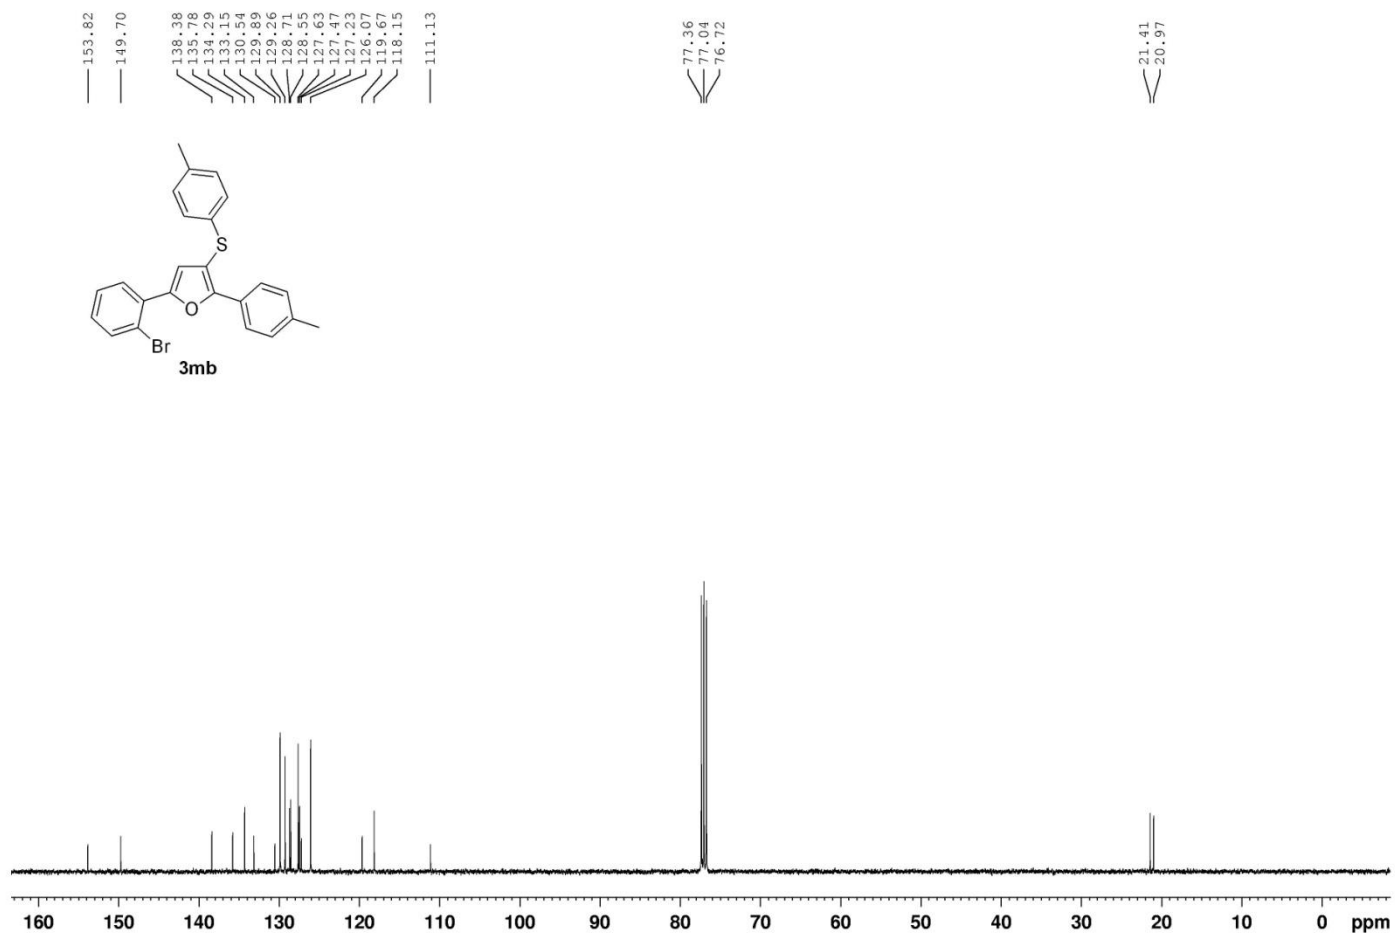

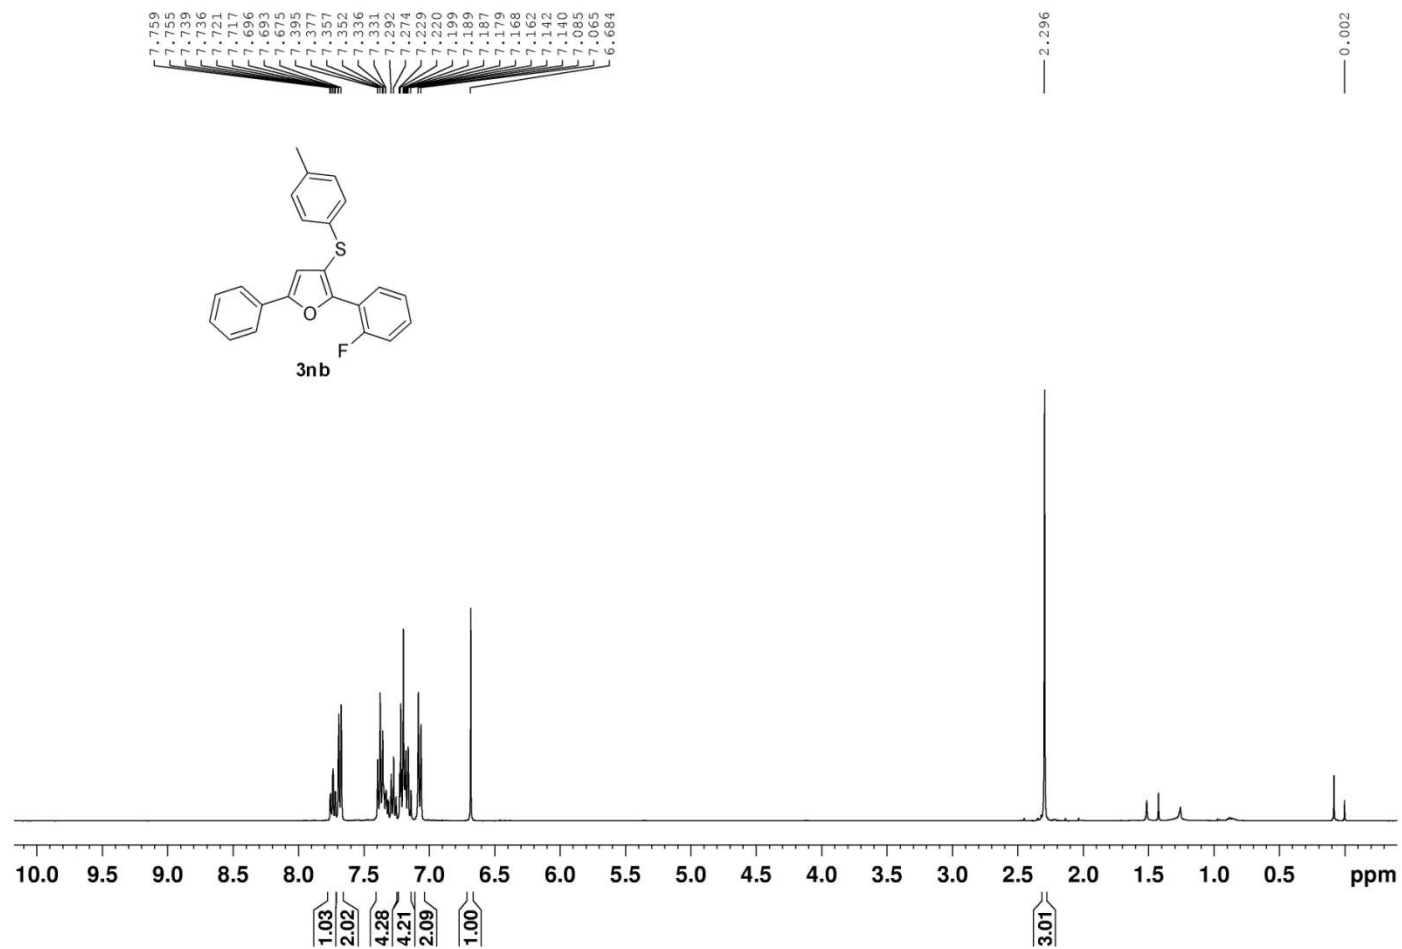

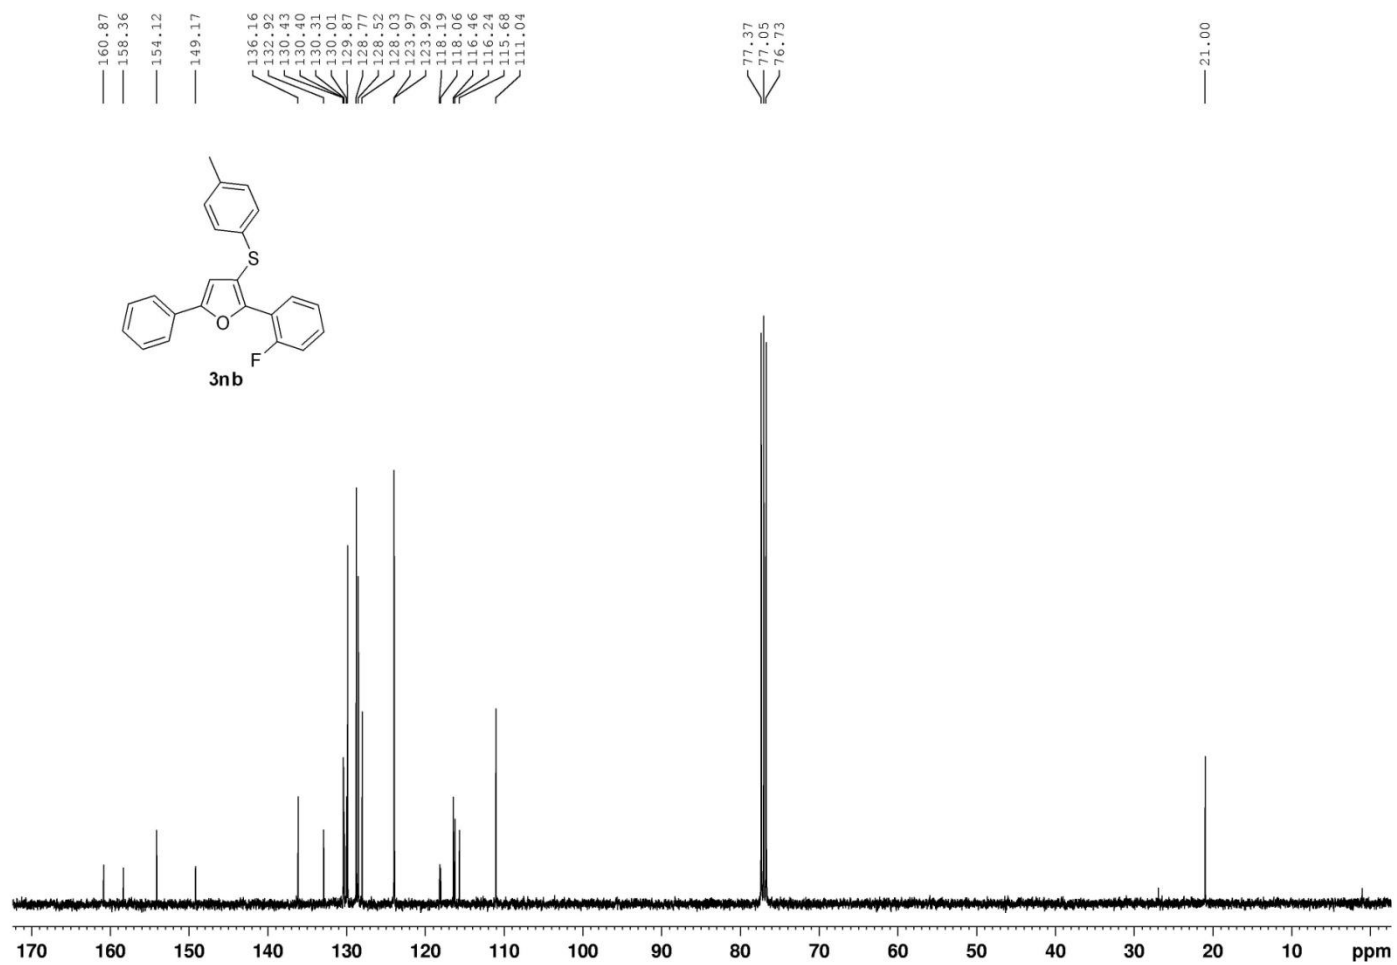

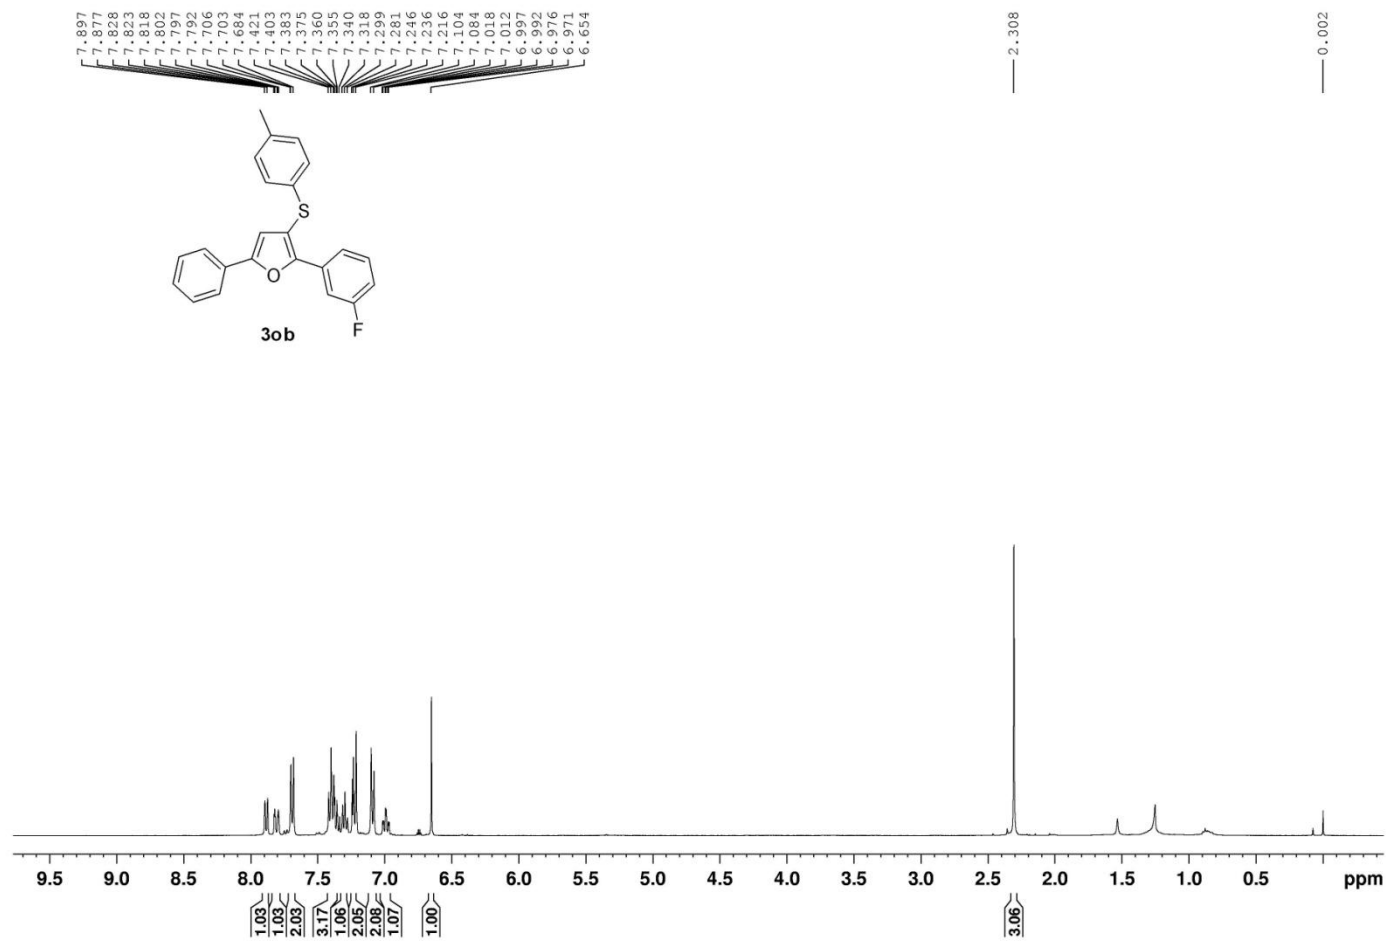

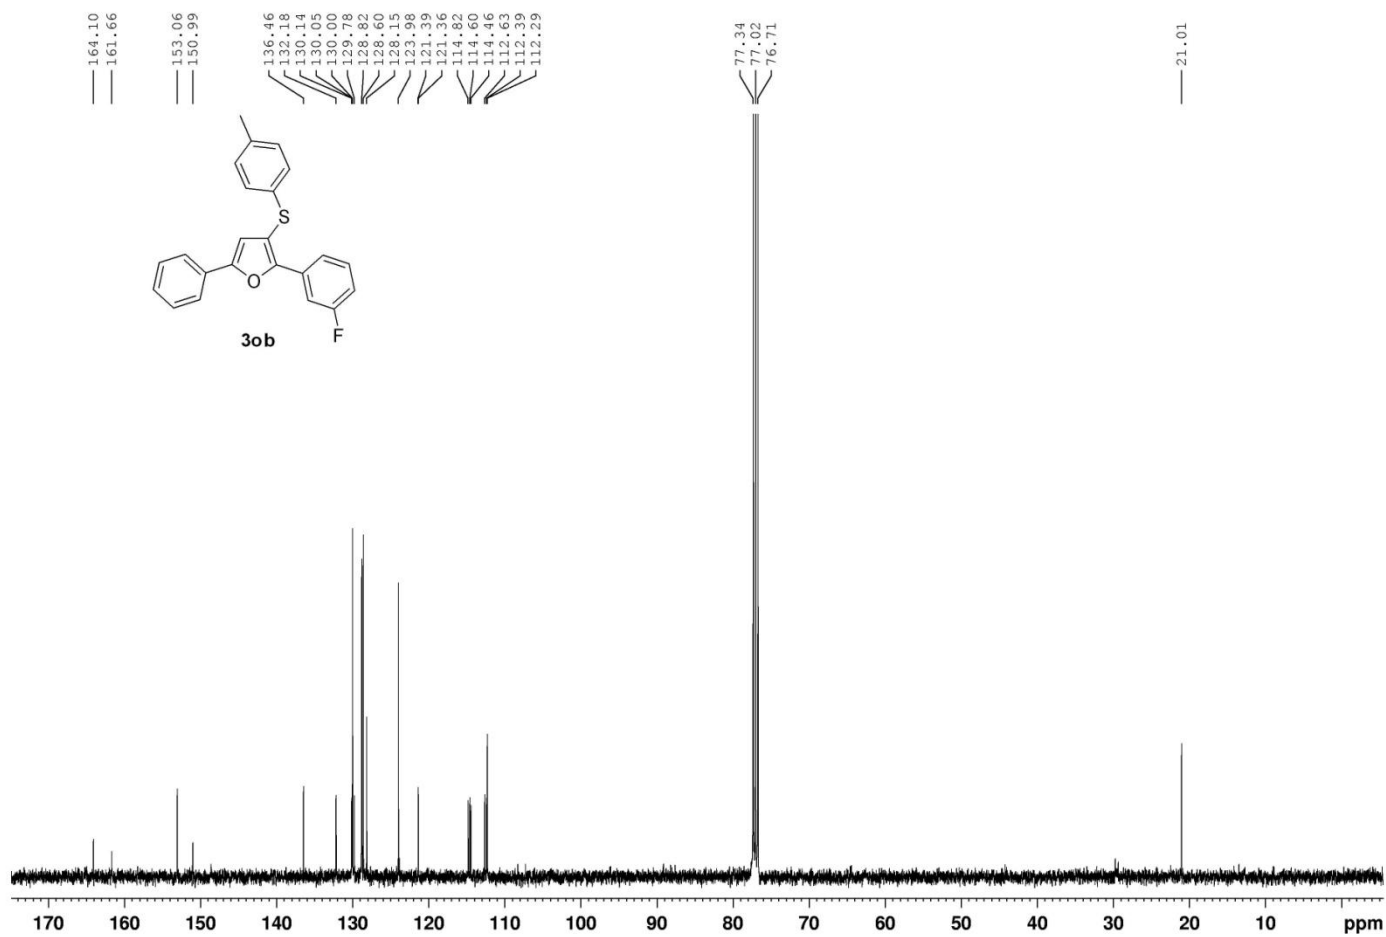

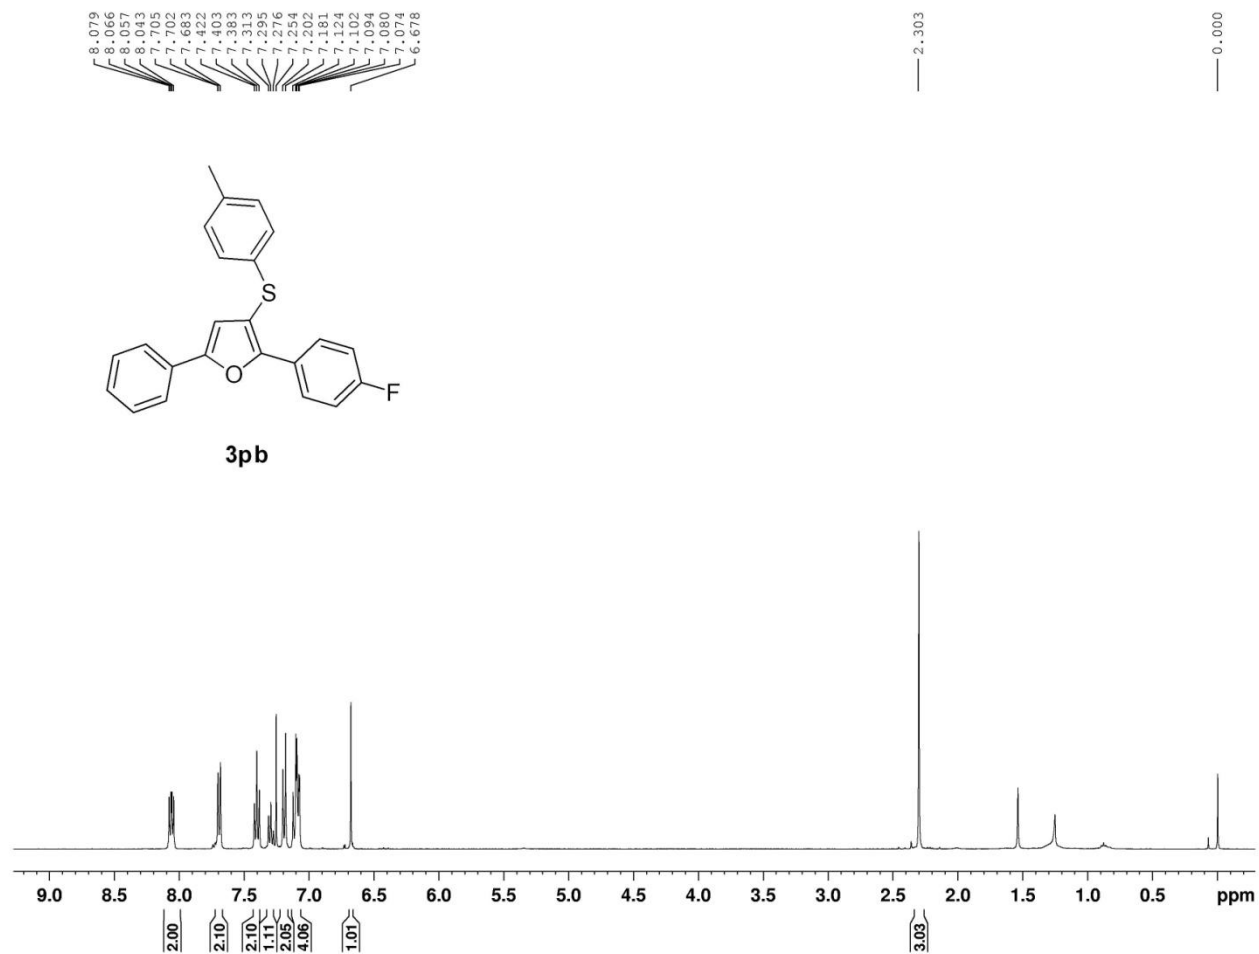

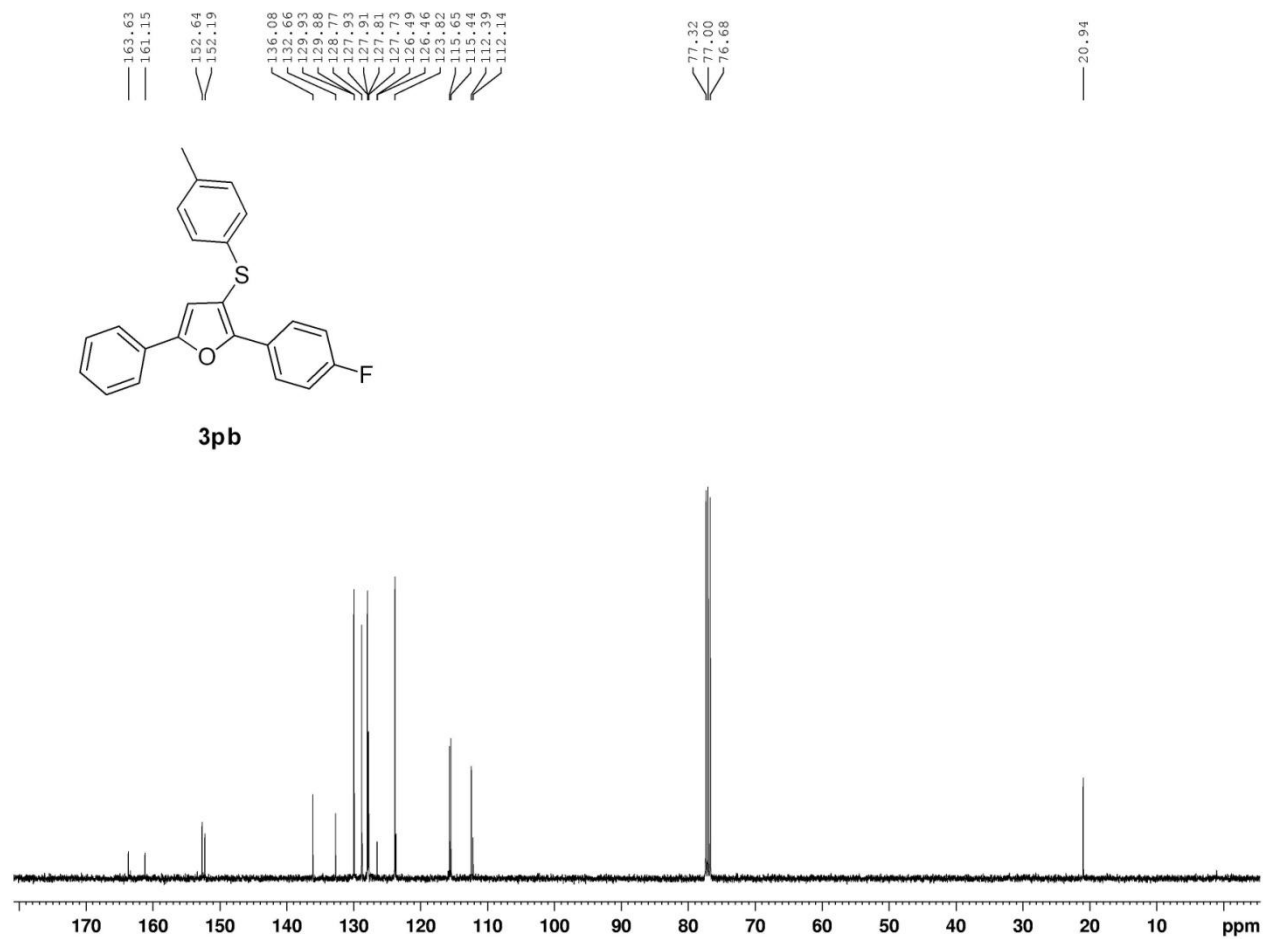

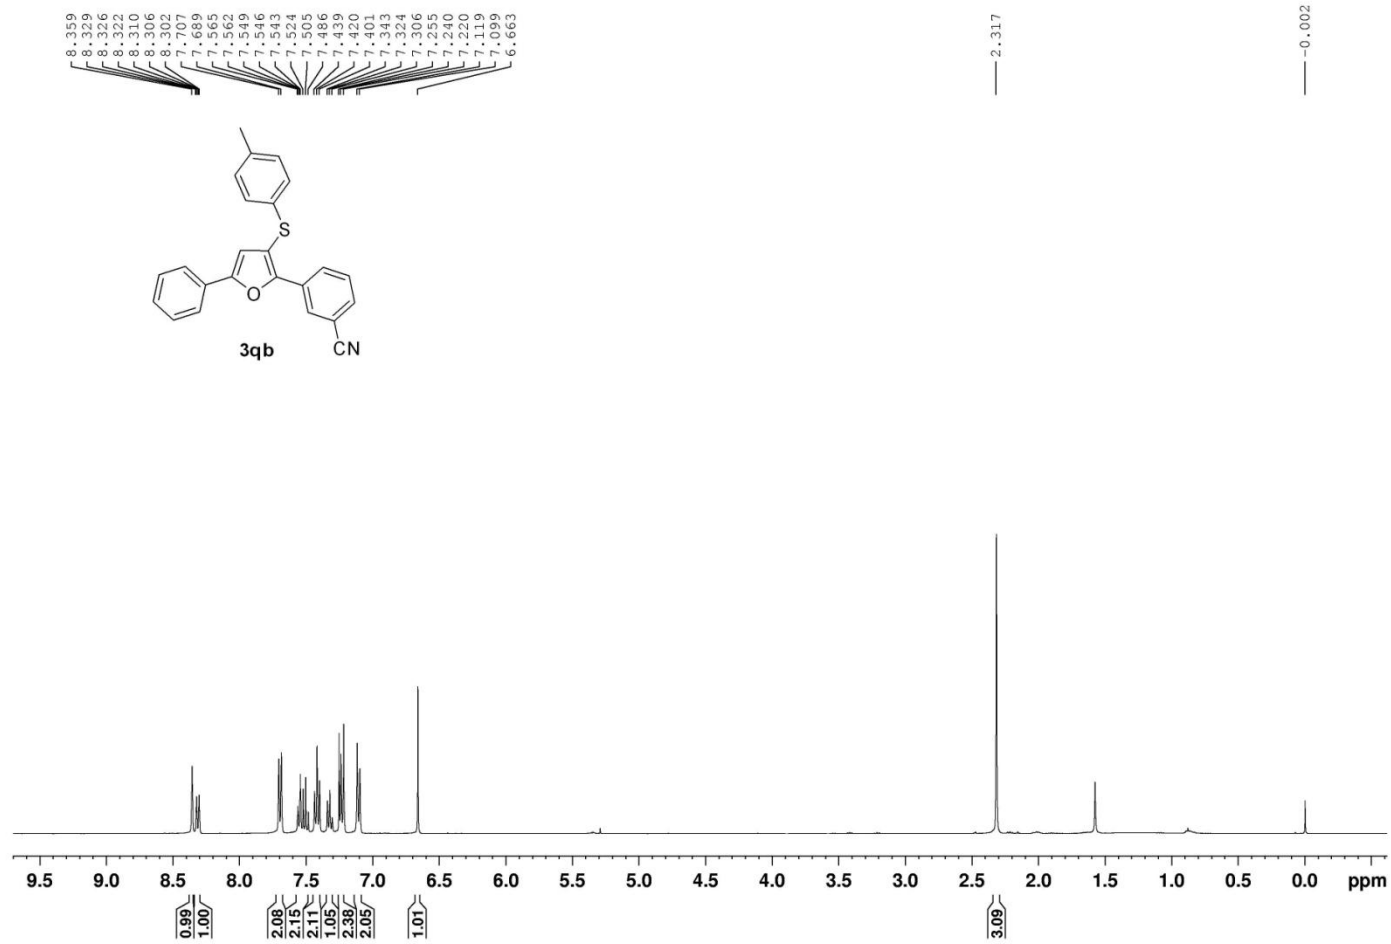

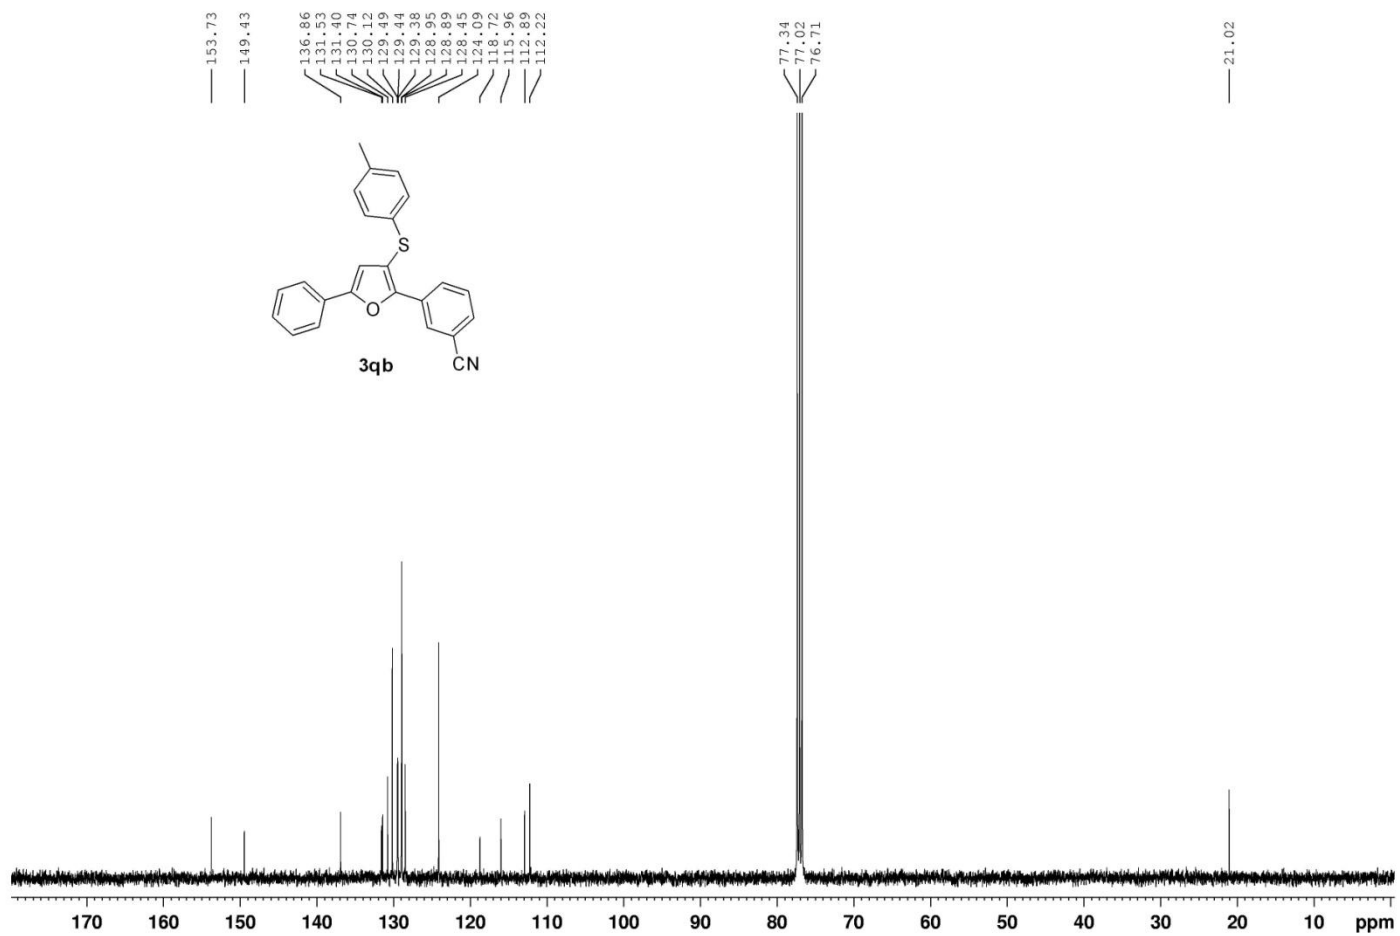

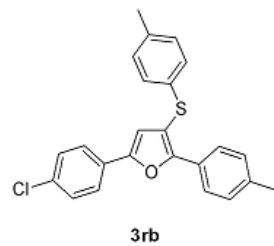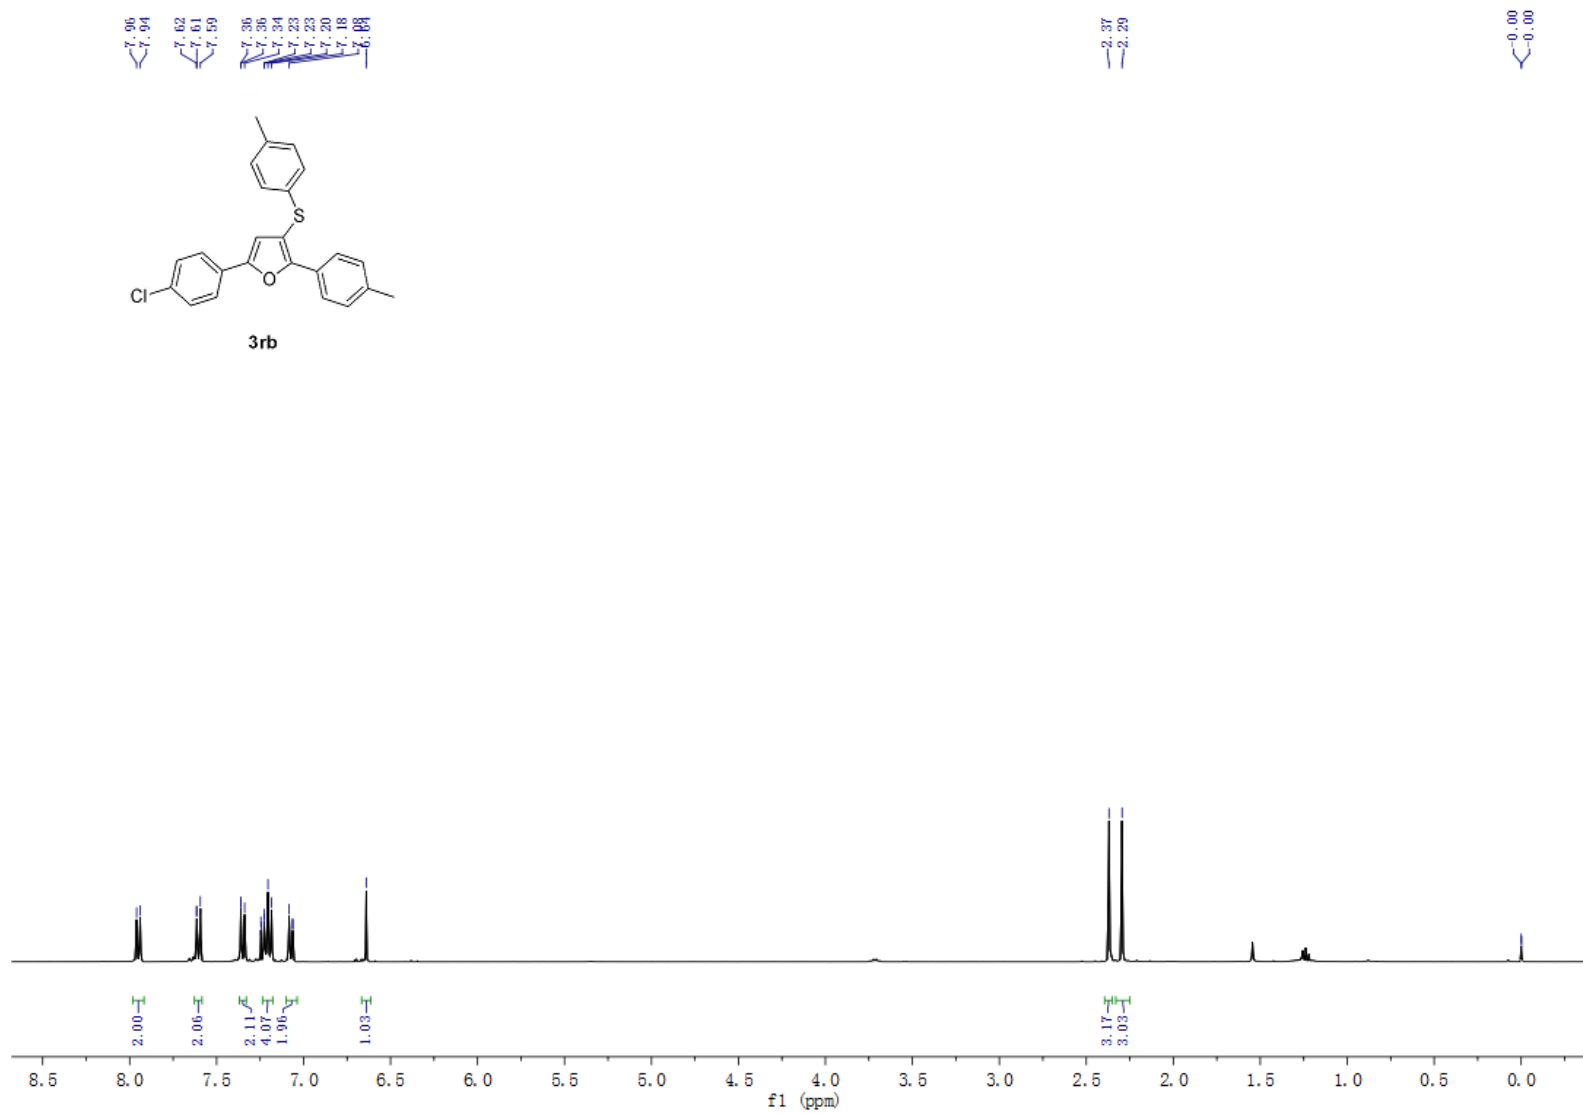

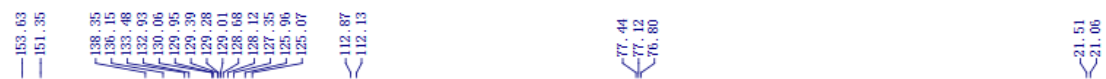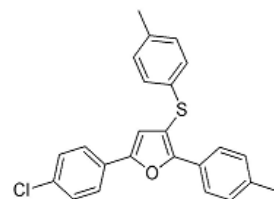

3rb

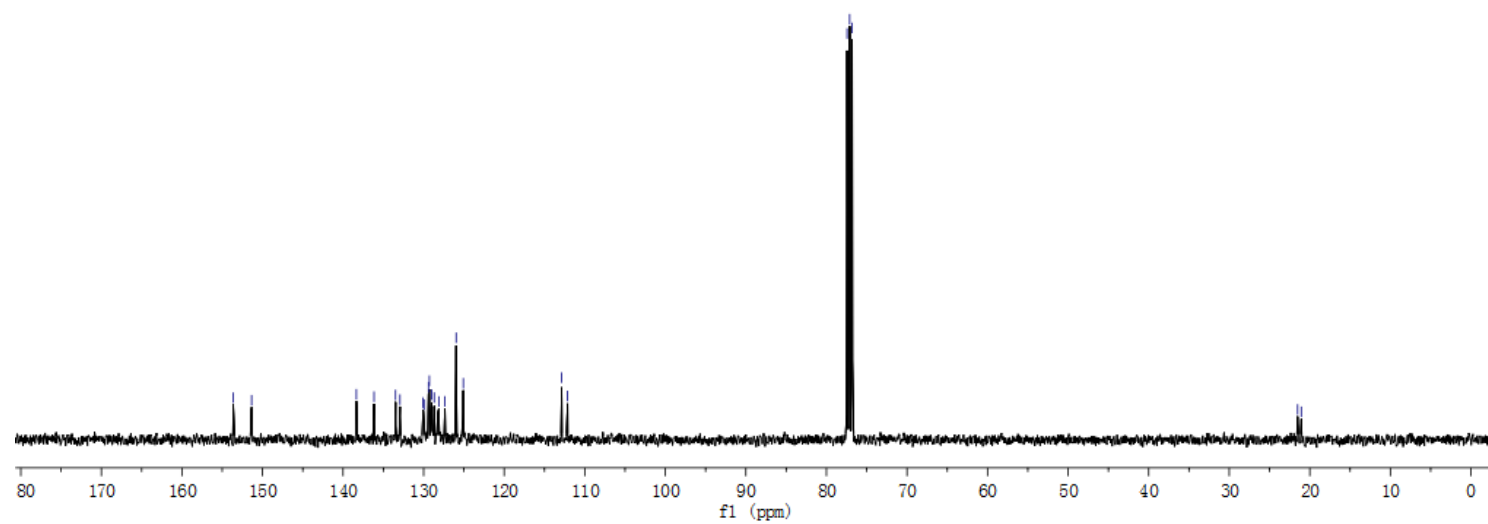

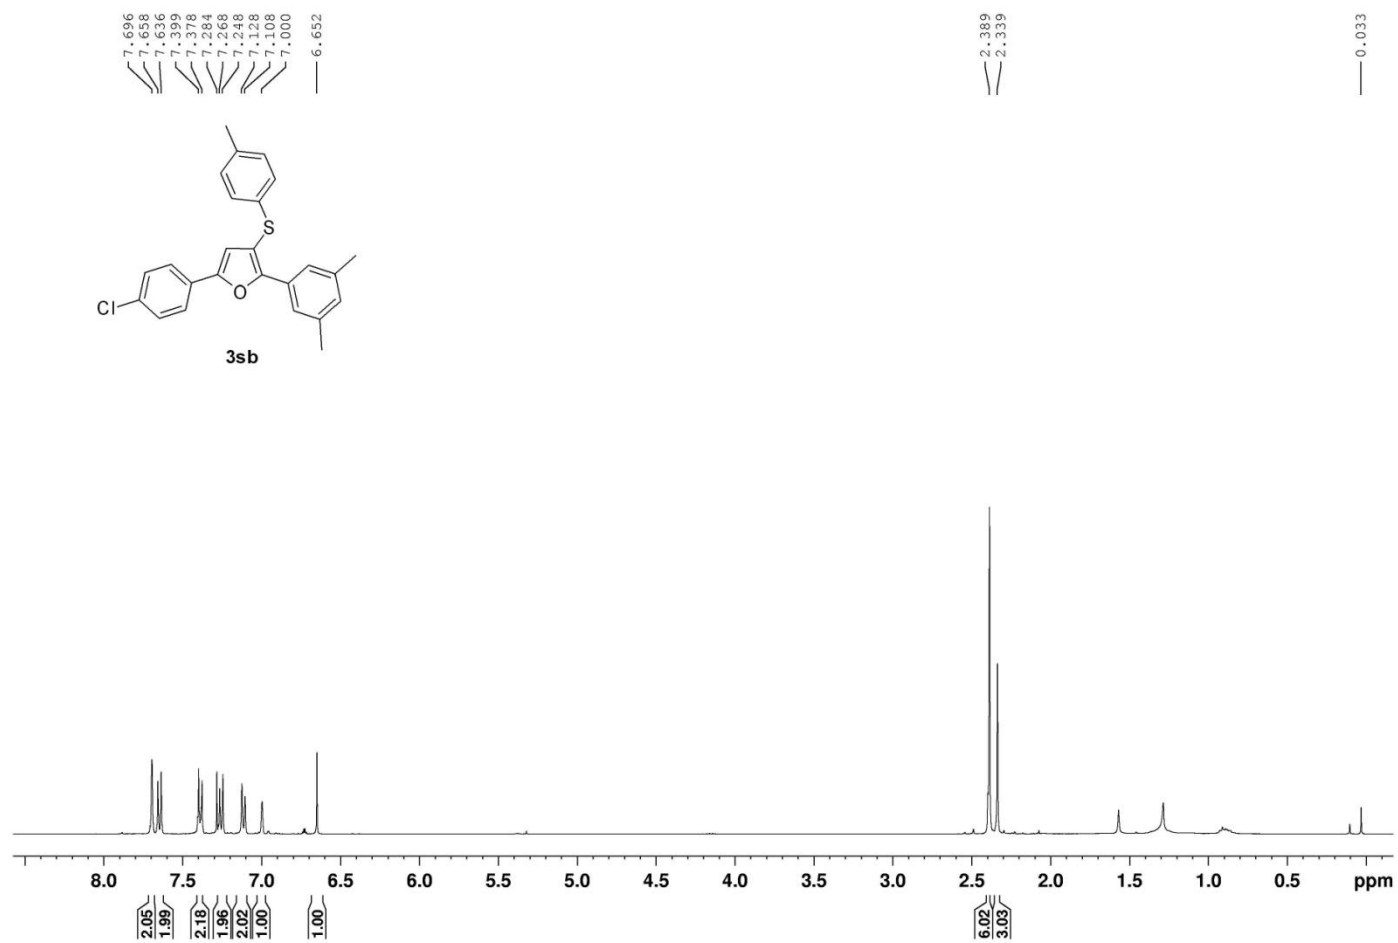

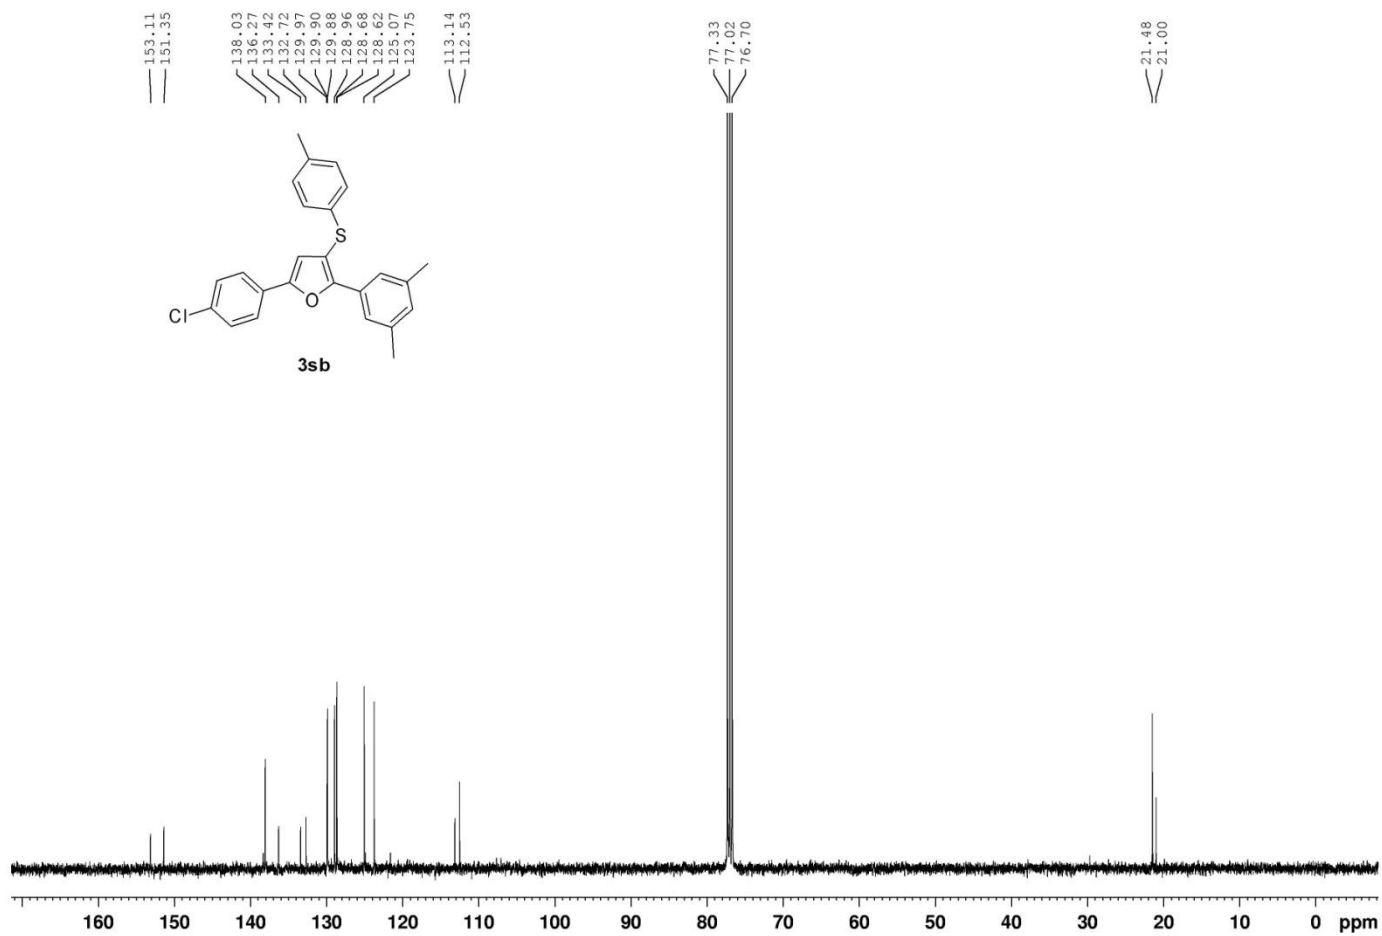

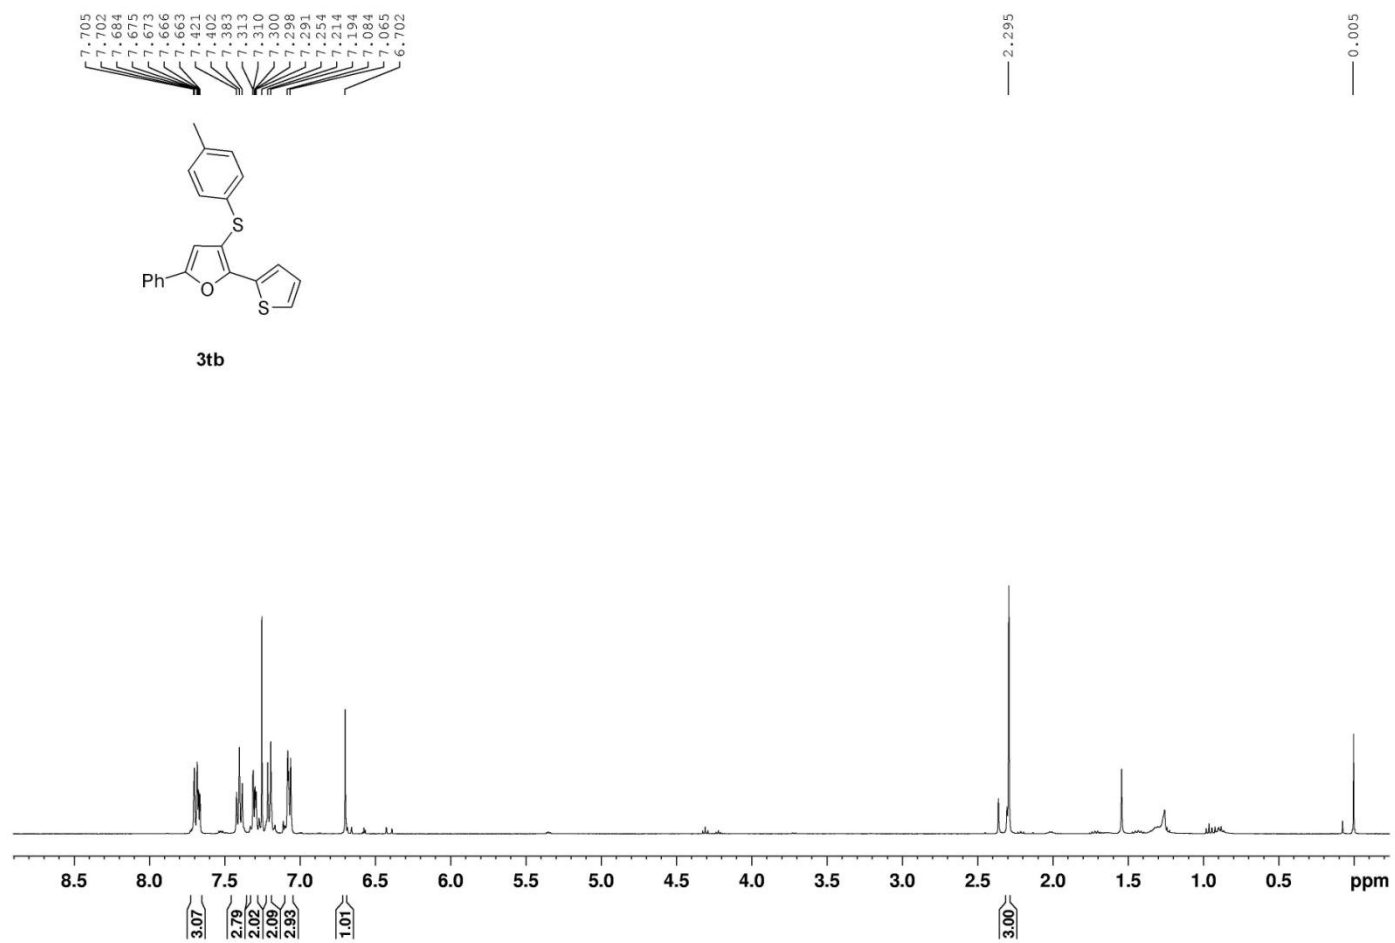

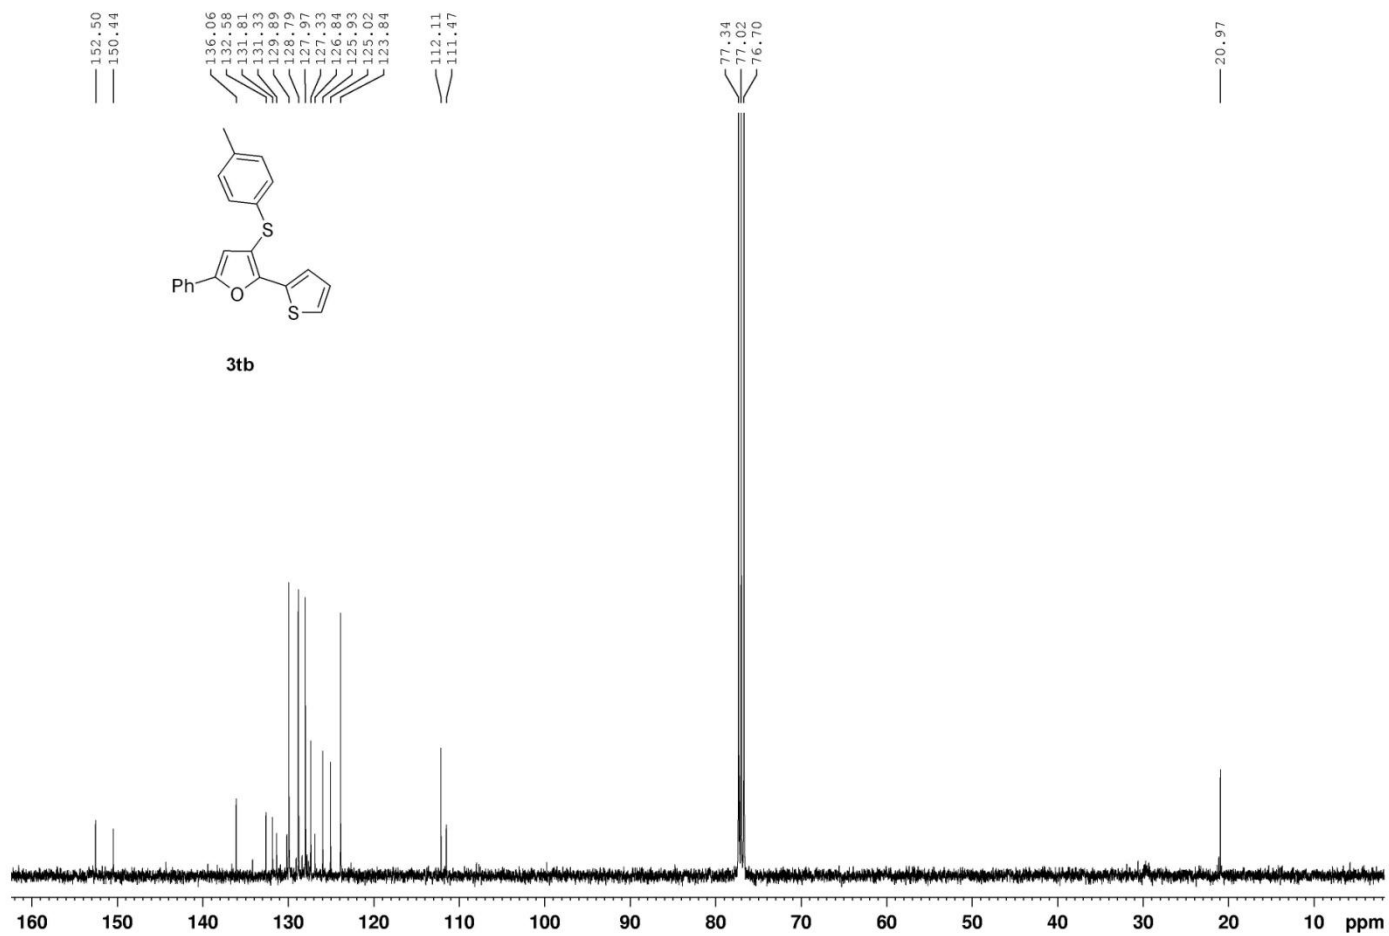

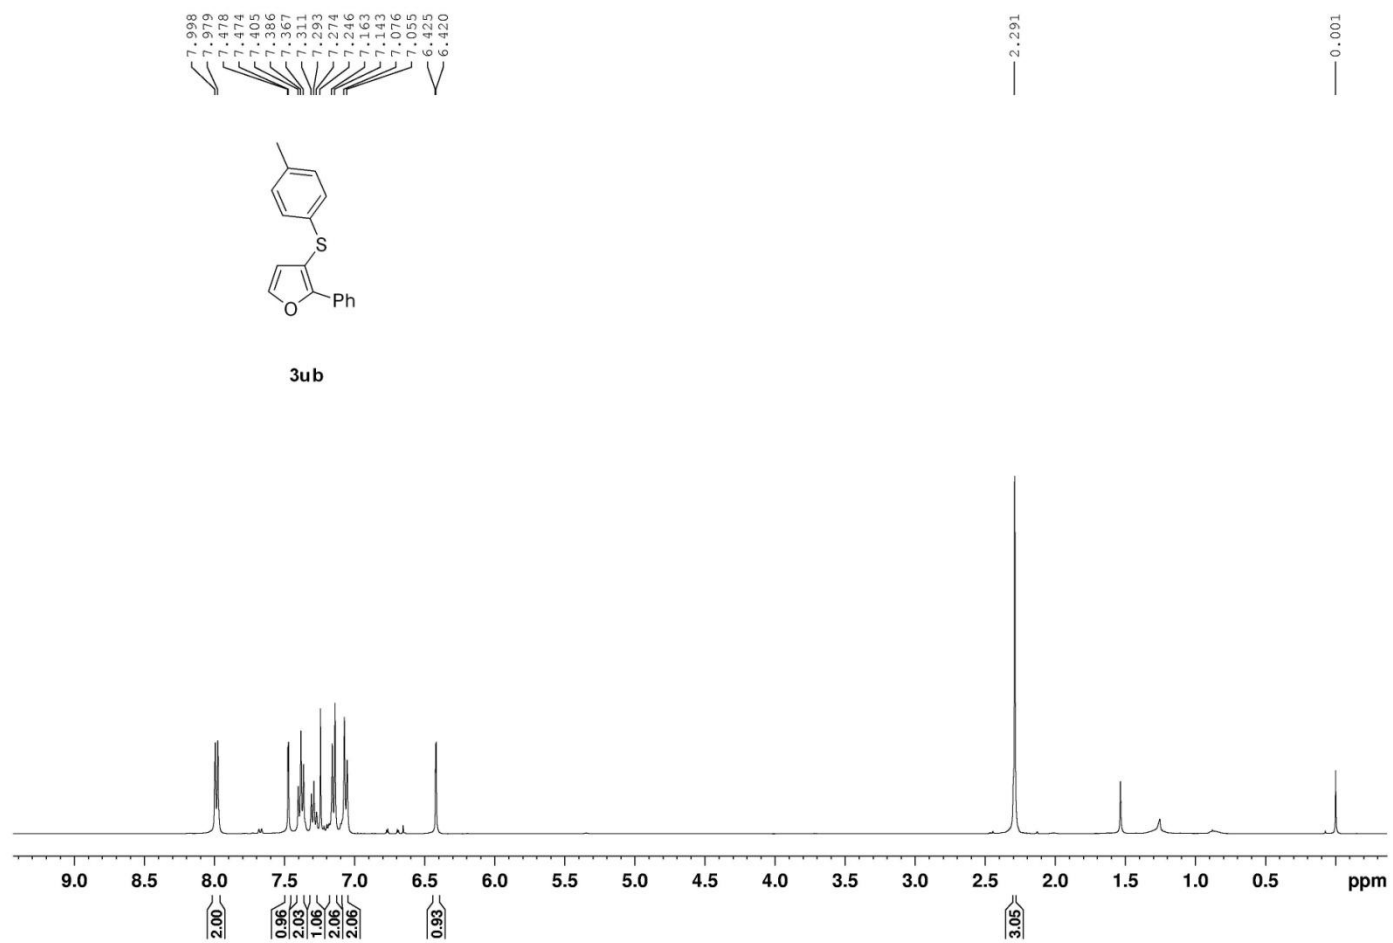

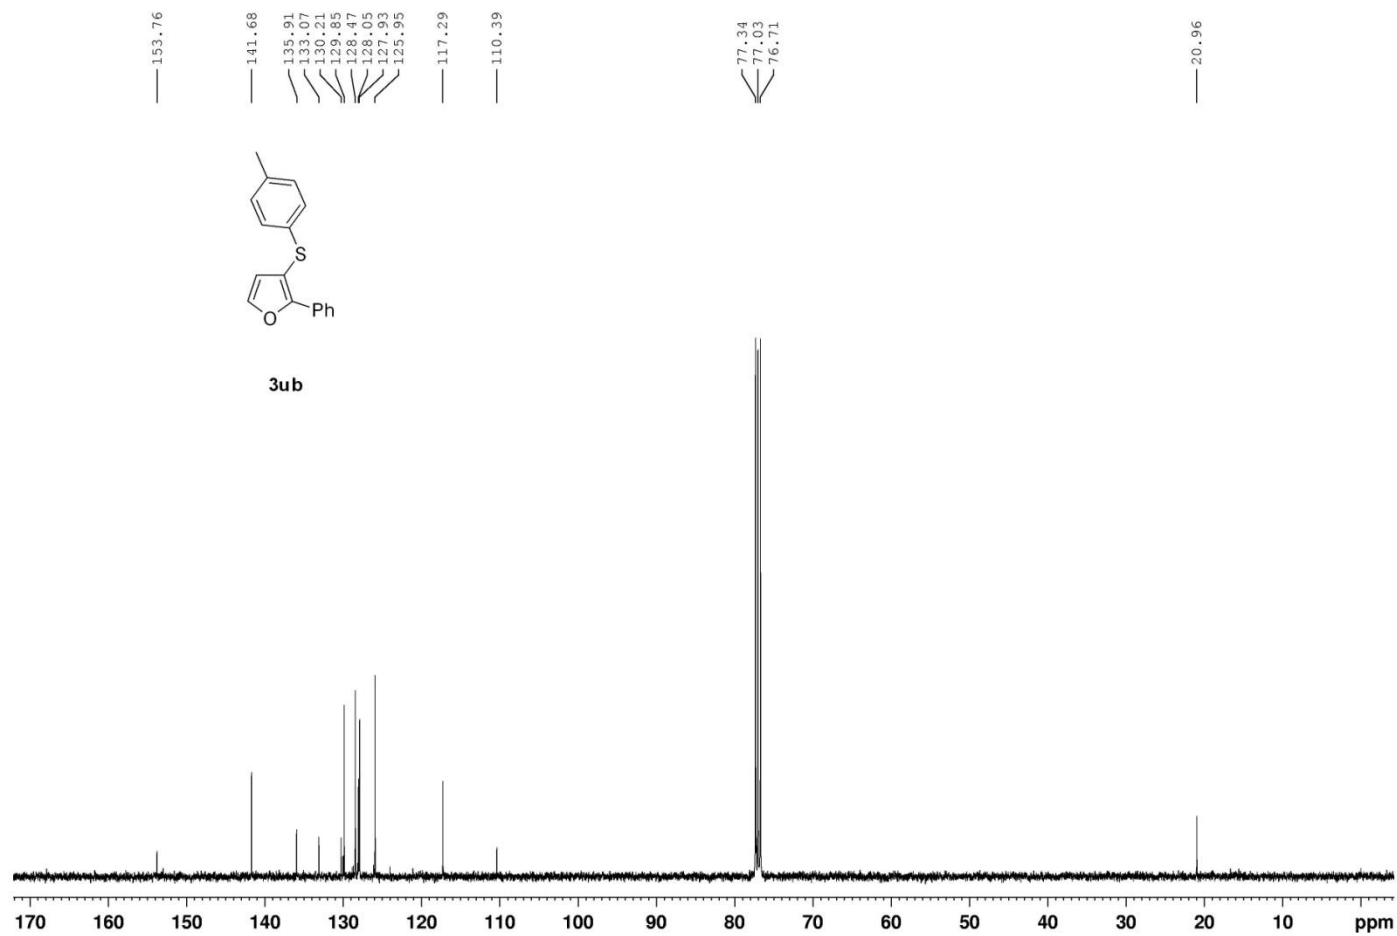

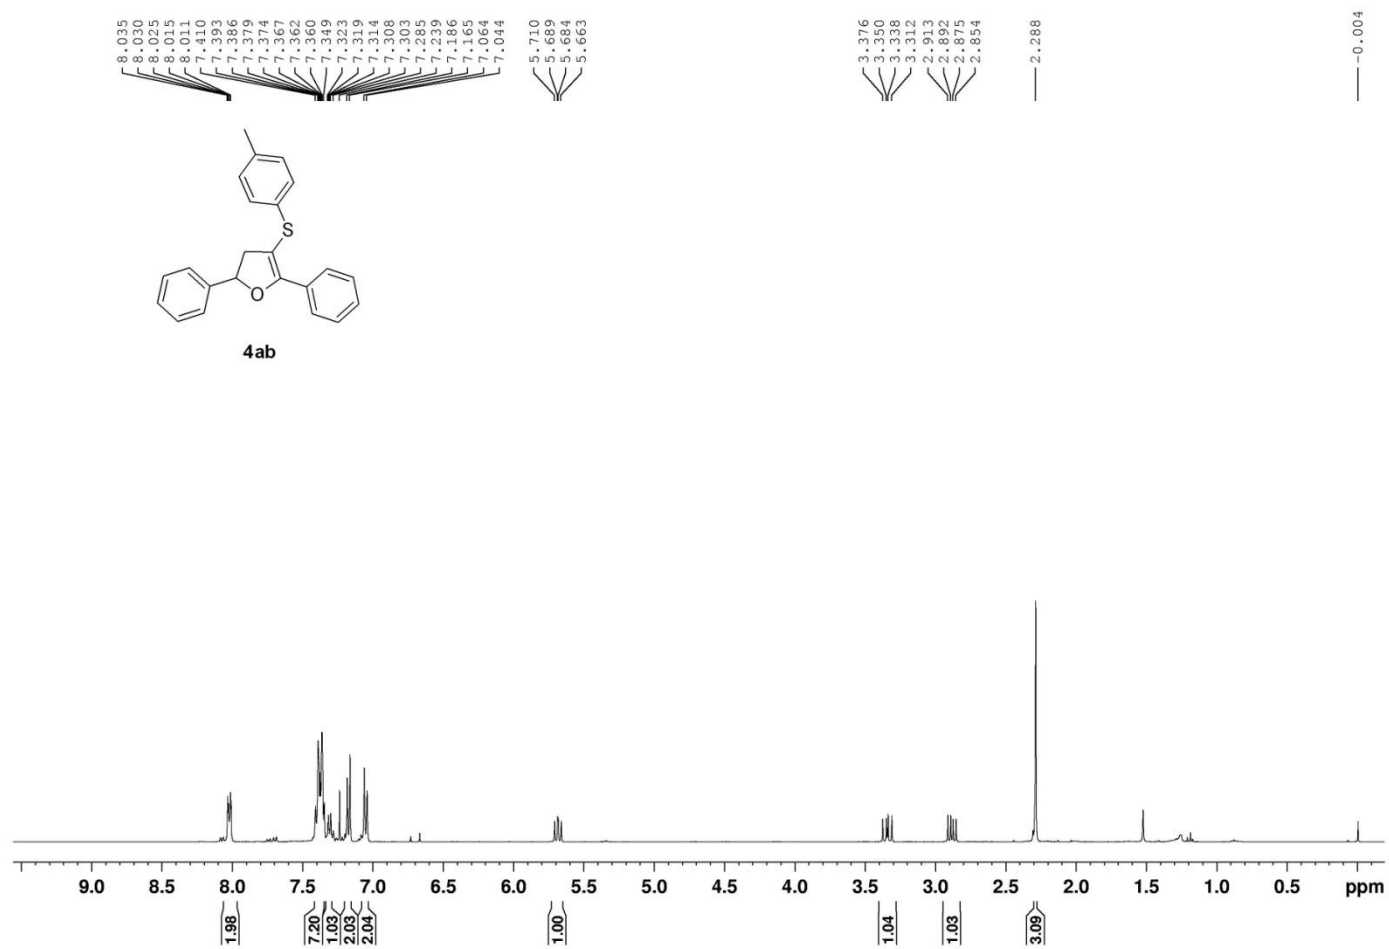

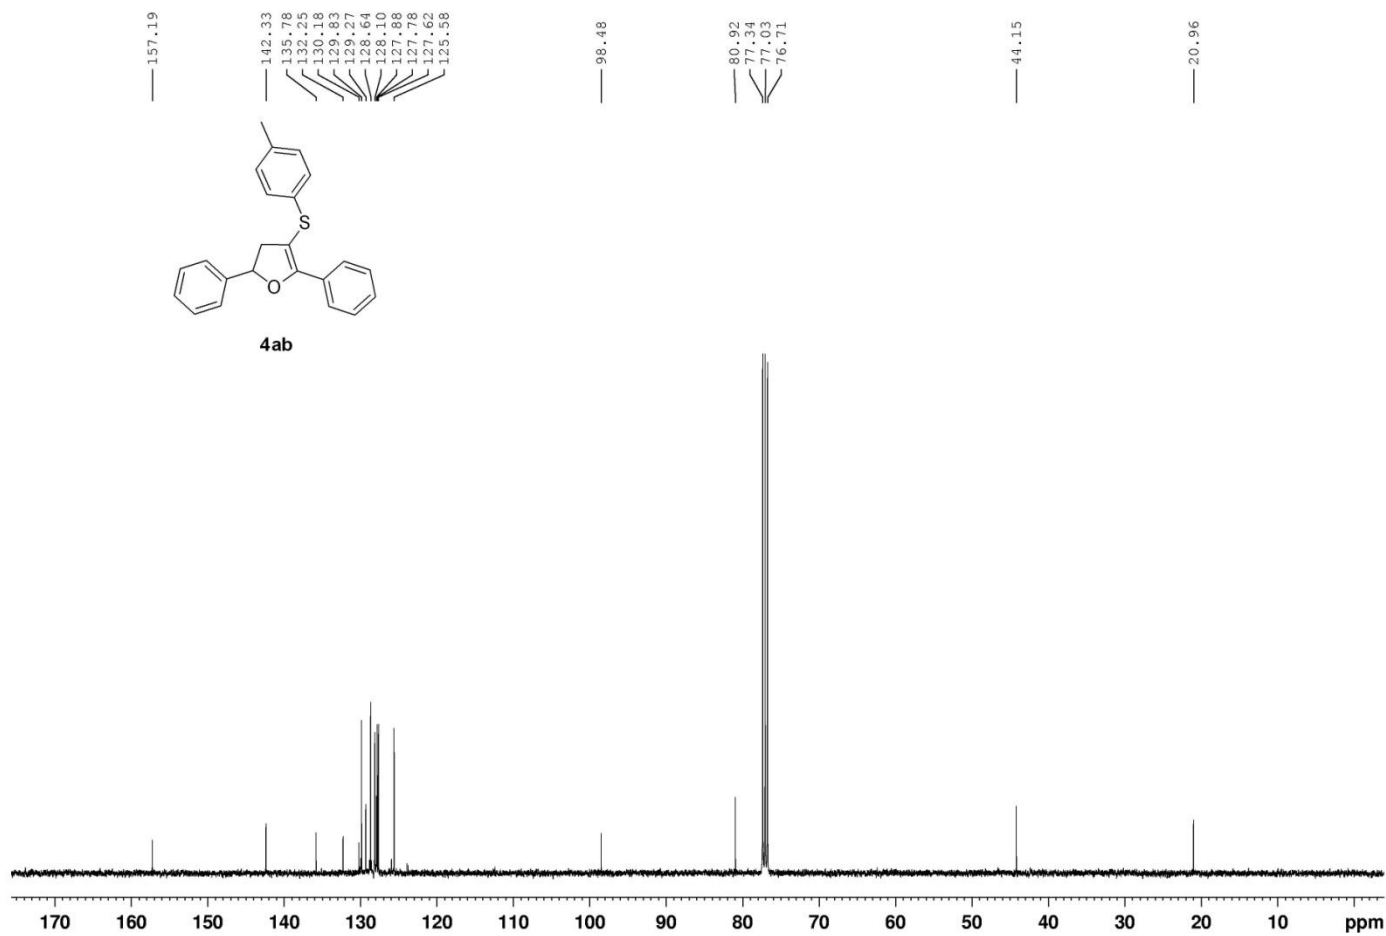

Supplement: c7ob00566k1.pdf [file c7ob00566k1.pdf]
